# Supplementary material for: Metal-free tandem reactions of 2-iodoaryl ynones with sodium azide for the synthesis of benzoisoxazole containing 1,2,3-triazoles
Source: Royal Society of Chemistry journal article supplement (doi:10.1039/d0ob02608e), 2021-01-01

## Supporting Information

### **Metal free tandem reactions of 2-iodoaryl ynones with sodium azide for the synthesis of benzoisoxazole containing 1,2,3-triazoles**

**Kashif Majeed<sup>a</sup>, Fengtao Zhou<sup>b\*</sup>, Qiuyu Zhang<sup>a\*</sup>**

<sup>a</sup>Xi'an Key Laboratory of Functional Organic Porous Materials, Department of Applied Chemistry, School of Chemistry and Chemical Engineering, Northwestern Polytechnical University, Xi'an, Shaanxi, 710072, PR China

<sup>b</sup>School of Pharmacy, Jinan University, Guangzhou, Guangdong, 510632, P.R. China

Email address: qy Zhang@nwpu.edu.cn (Q. Zhang);

fengtaozhou@163.com (F. Zhou)

## **Table of Contents**

**1. Copies NMR spectra**

**S1**

# 1. Copies of NMR Spectra for Compounds

20191207-Phe-K-H-2.3.fid

8.145  
8.140  
8.125  
8.121  
8.096  
8.096  
8.032  
8.029  
7.653  
7.649  
7.645  
7.637  
7.635  
7.628  
7.518  
7.515  
7.499  
7.496  
7.480  
7.476  
7.475  
7.461  
7.457  
7.453  
7.426  
7.423  
7.421  
7.417  
7.415  
7.402  
7.397  
7.388  
7.384  
7.381  
7.221  
7.217  
7.207  
7.197  
7.183  
7.178

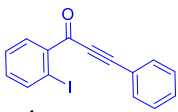

**1a**

<sup>1</sup>H NMR (400 MHz, CDCl<sub>3</sub>)

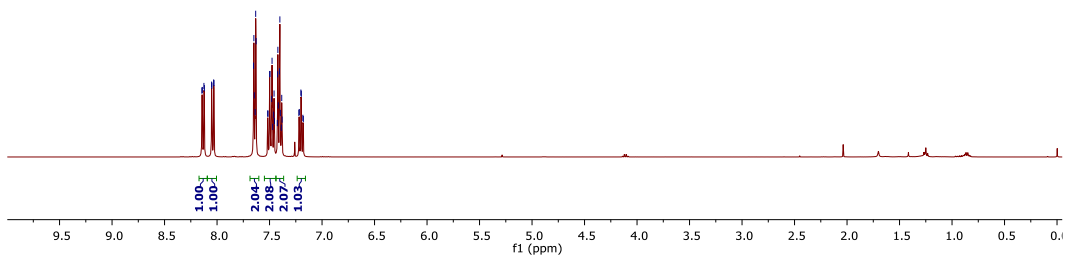

20191207-Phe-K-C-2.15.fid

177.802  
141.917  
139.058  
133.273  
132.876  
130.799  
128.493  
127.896  
119.653  
94.147  
92.636  
86.953  
77.201  
76.882  
76.565

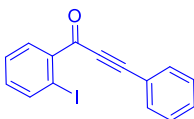

**1a**

<sup>13</sup>C NMR (400 MHz, CDCl<sub>3</sub>)

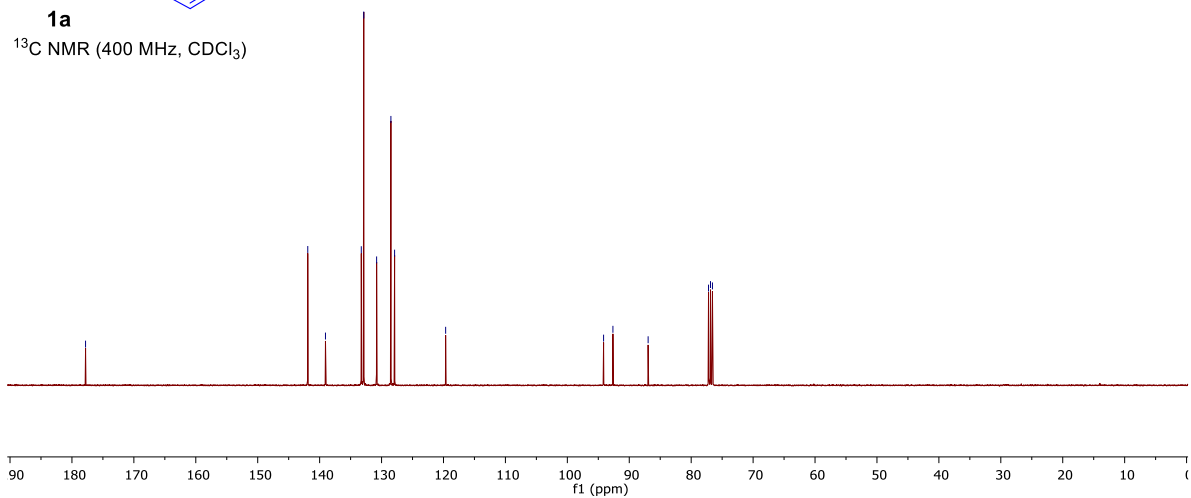

20191207-4-Me-K-H-3.4.fid

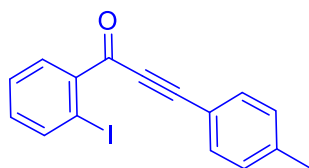

**1b**

$^1\text{H}$  NMR (400 MHz,  $\text{CDCl}_3$ )

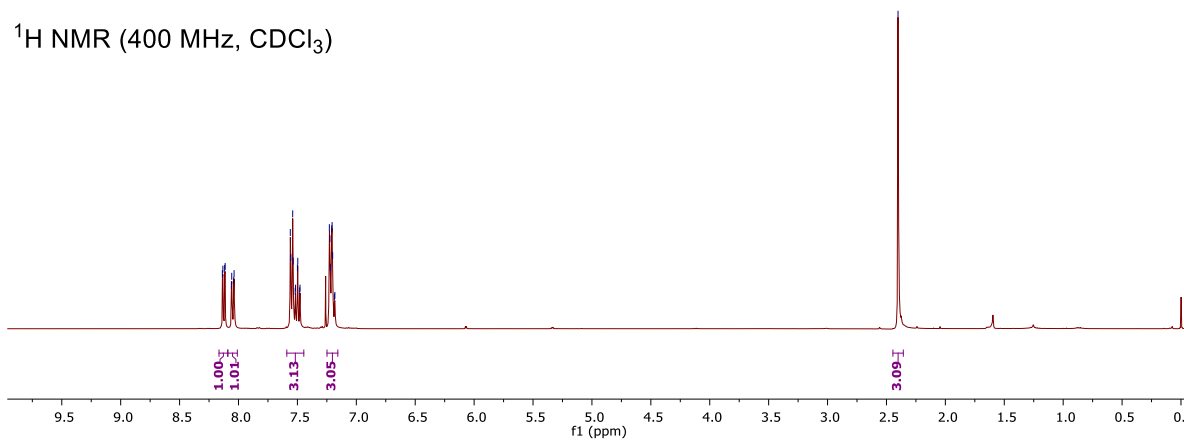

20191207-4-Me-K-C-3.16.fid

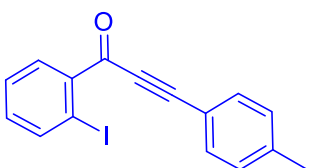

**1b**

$^{13}\text{C}$  NMR (400 MHz,  $\text{CDCl}_3$ )

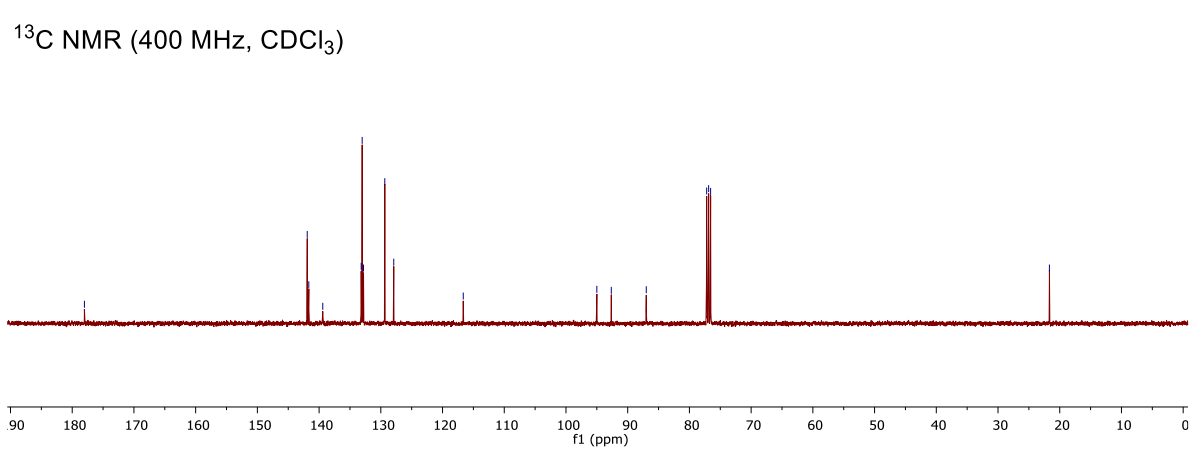

20191207-4-Et-K-H-4.5.fid

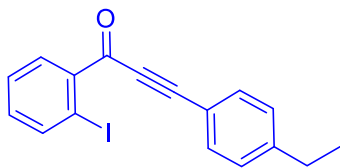

**1c**

$^1\text{H}$  NMR (400 MHz,  $\text{CDCl}_3$ )

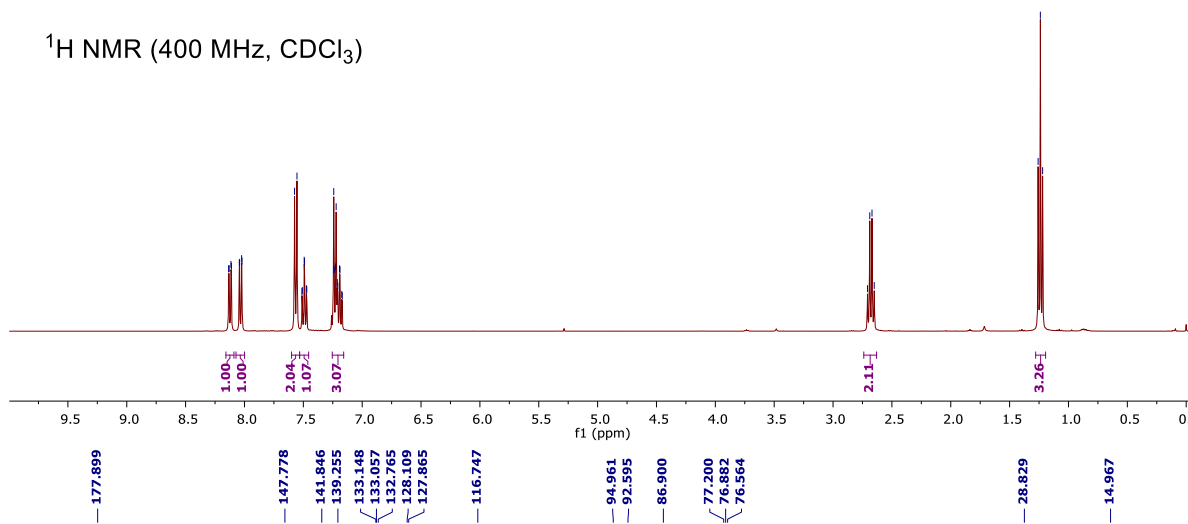

20191207-4-Et-K-C-4.17.fid

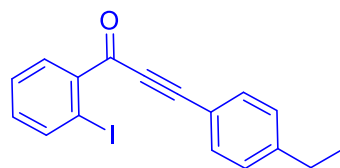

**1c**

$^{13}\text{C}$  NMR (400 MHz,  $\text{CDCl}_3$ )

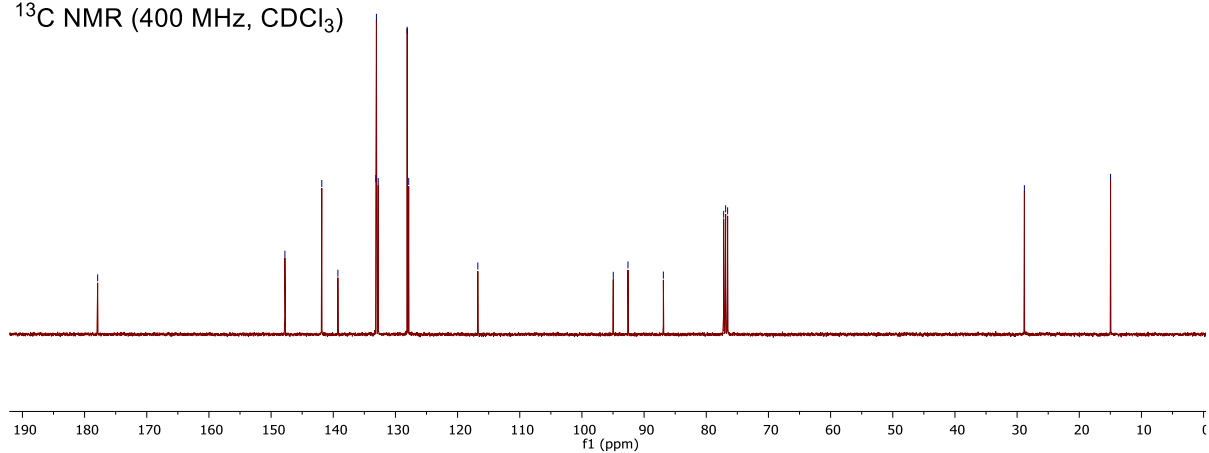

8.136  
8.131  
8.116  
8.112  
8.046  
8.027  
7.571  
7.551  
7.509  
7.490  
7.472  
7.223  
7.203  
7.194  
7.191  
7.172

2.634  
2.615  
2.596  
1.690  
1.681  
1.671  
1.653  
1.634  
1.615  
1.597  
0.954  
0.936  
0.917

20200124-3-H.28.fid

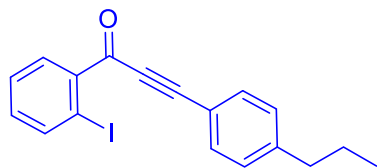

**1d**

$^1\text{H}$  NMR (400 MHz,  $\text{CDCl}_3$ )

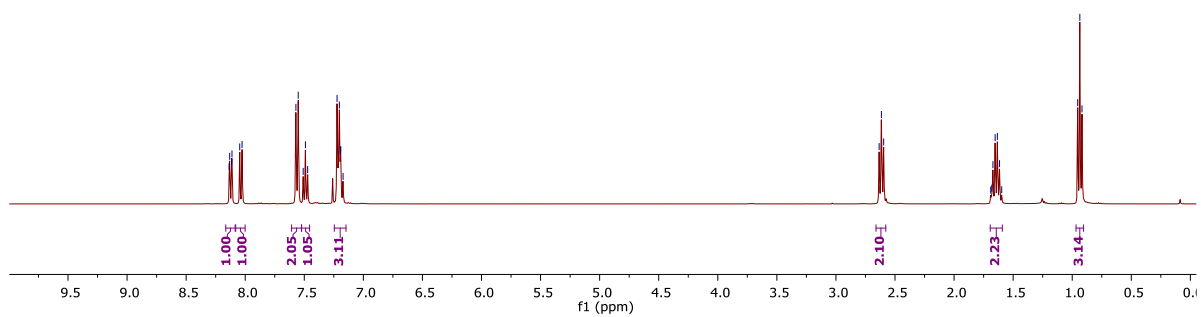

177.933  
146.310  
141.868  
139.309  
133.151  
132.986  
132.775  
128.713  
127.874  
116.799  
95.002  
92.613  
86.942  
77.200  
76.883  
76.564  
37.922  
24.004  
13.563

20200124-3-C.29.fid

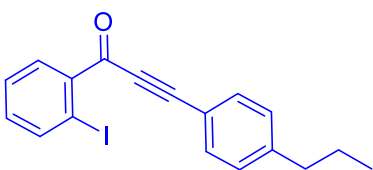

**1d**

$^{13}\text{C}$  NMR (400 MHz,  $\text{CDCl}_3$ )

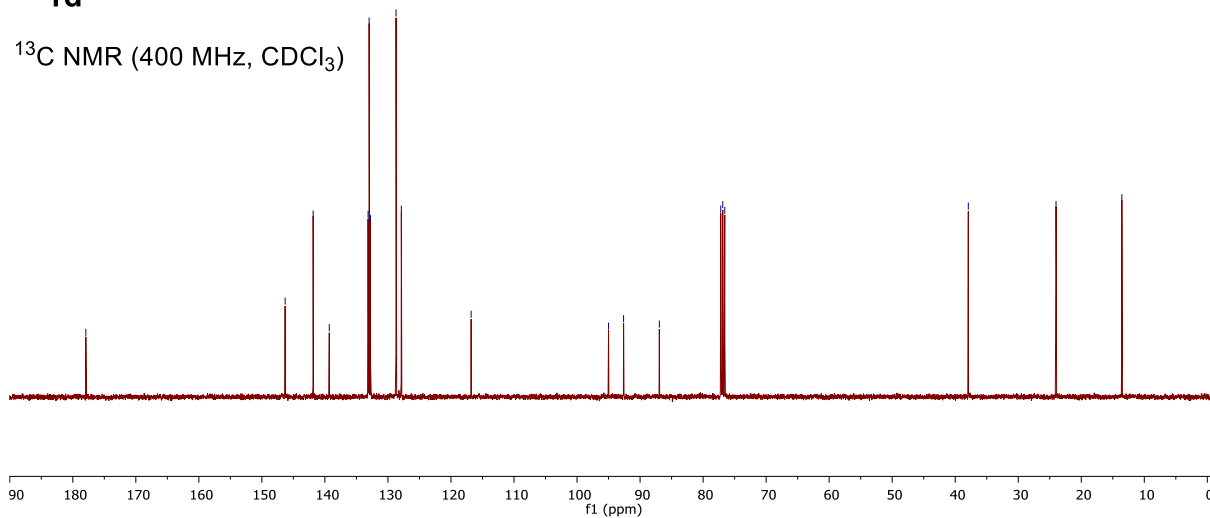

20191207-4-OMe-K-H-5.6.fid

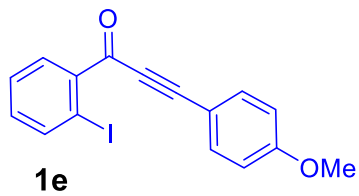

<sup>1</sup>H NMR (400 MHz, CDCl<sub>3</sub>)

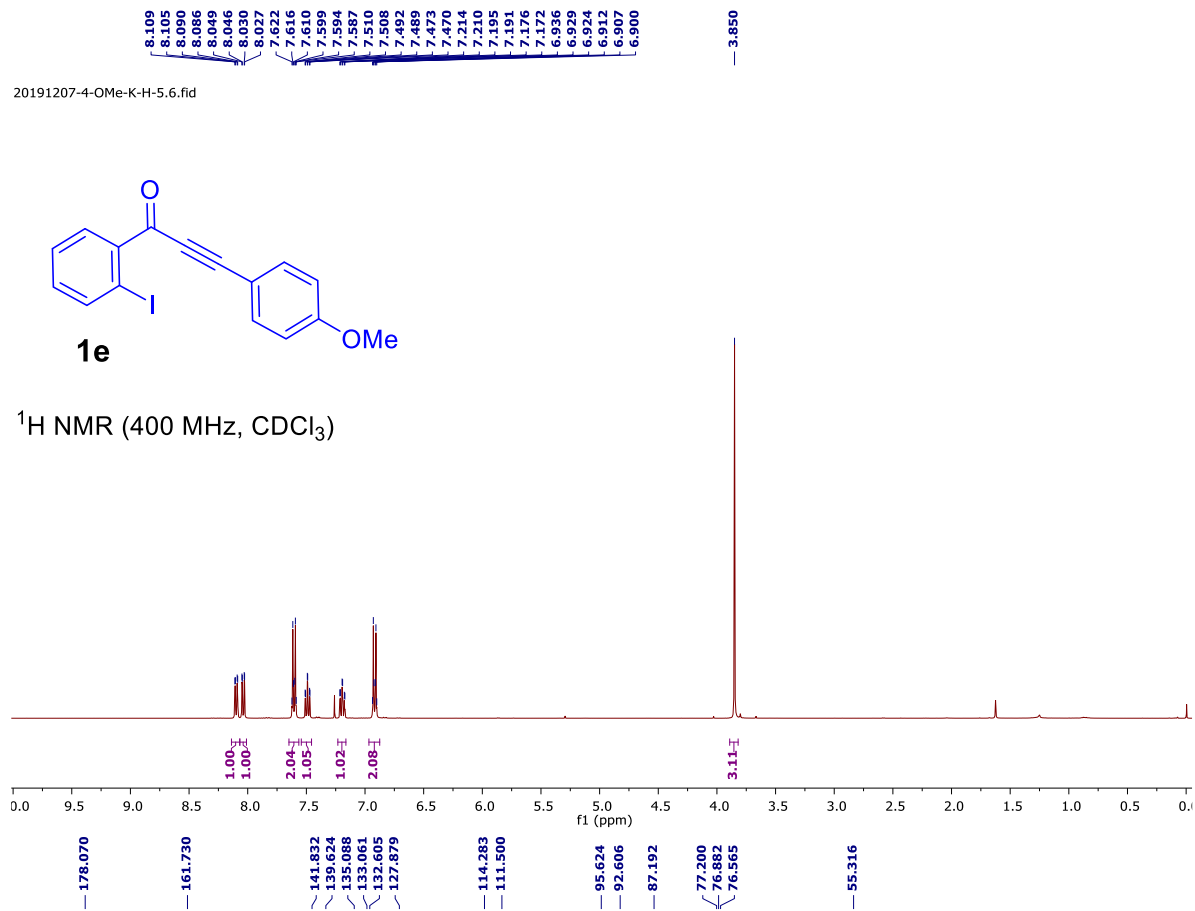

20191207-4-OMe-K-C-5.18.fid

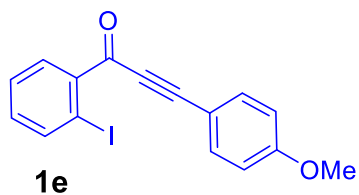

<sup>13</sup>C NMR (400 MHz, CDCl<sub>3</sub>)

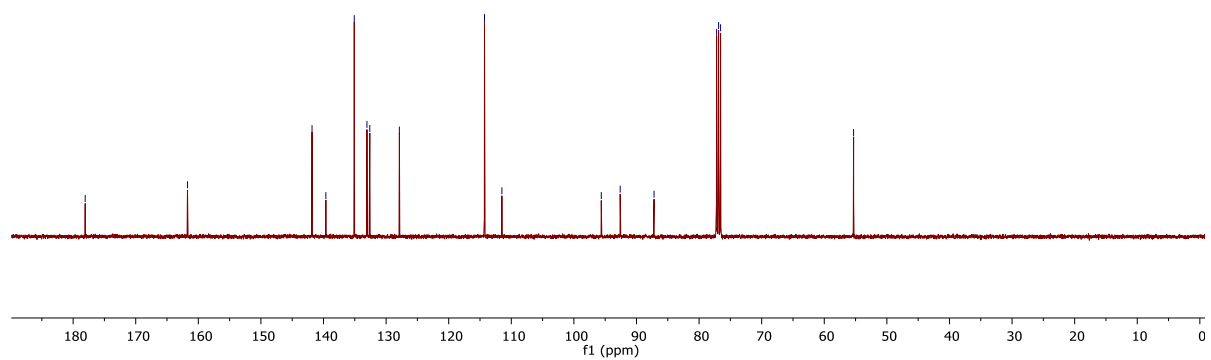

20200711-2-F-H.8.fid

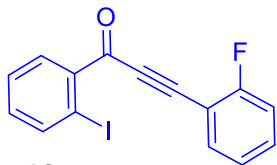

**1f**

<sup>1</sup>H NMR (400 MHz, CDCl<sub>3</sub>)

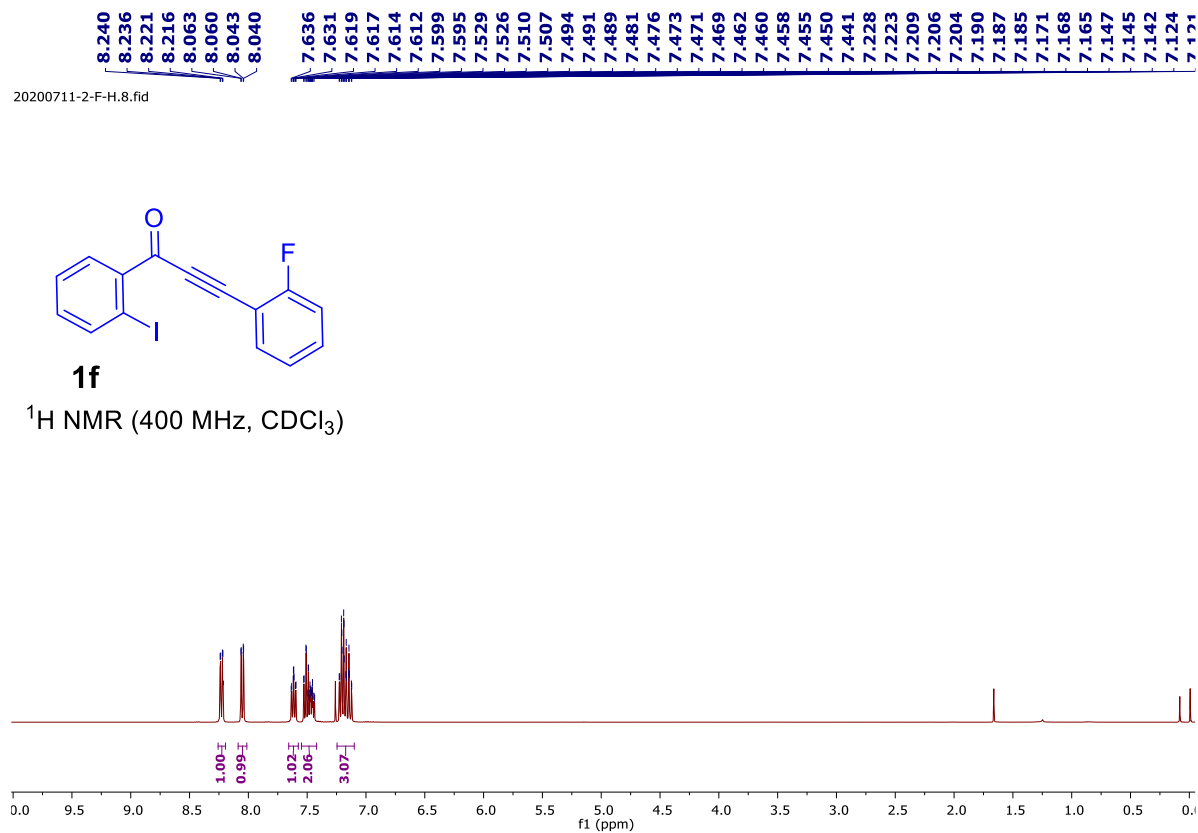

20200711-2-F-C.9.fid

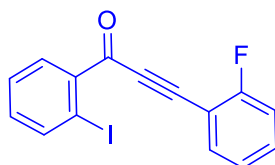

**1f**

<sup>13</sup>C NMR (400 MHz, CDCl<sub>3</sub>)

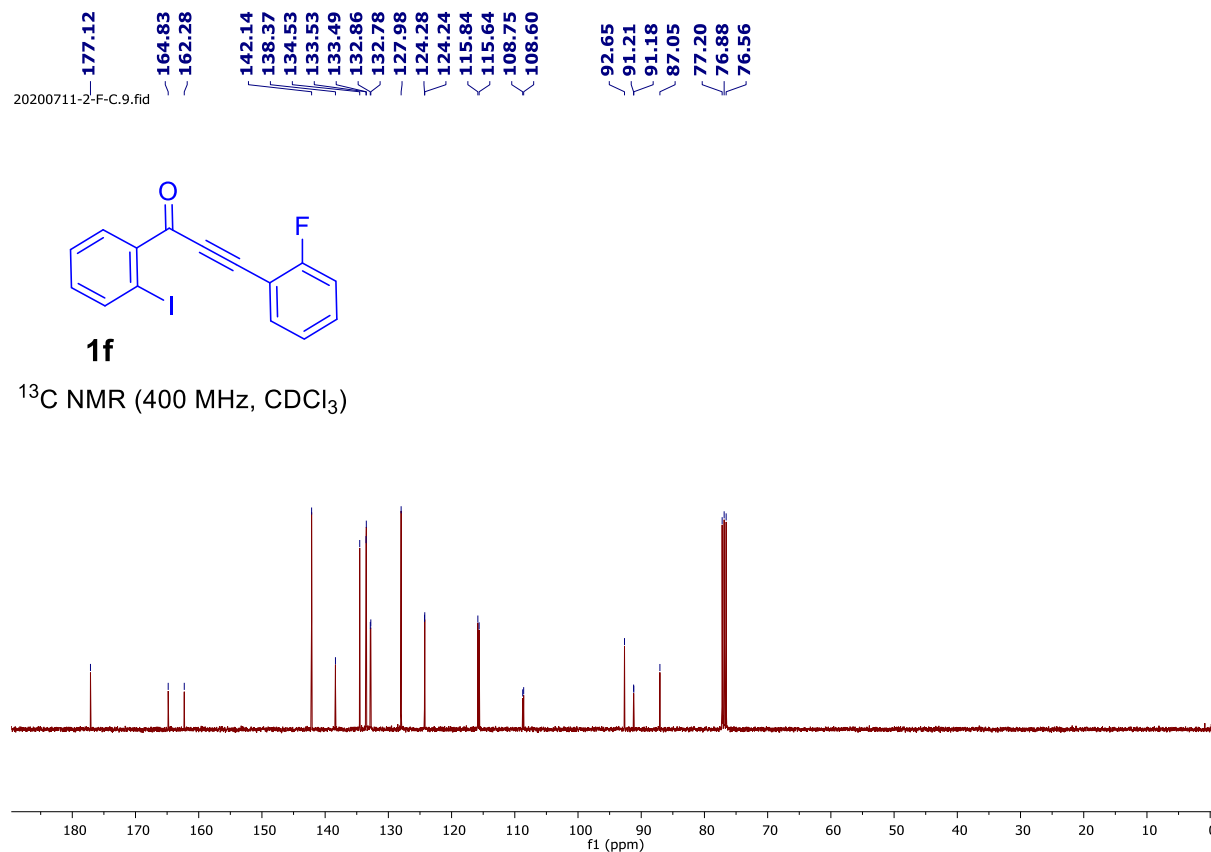



8.337  
8.333  
8.318  
8.314  
8.071  
8.069  
8.052  
8.049  
7.682  
7.677  
7.662  
7.658  
7.532  
7.529  
7.513  
7.510  
7.494  
7.491  
7.476  
7.473  
7.456  
7.453  
7.422  
7.418  
7.404  
7.399  
7.383  
7.379  
7.323  
7.320  
7.304  
7.301  
7.285  
7.282  
7.231  
7.227  
7.212  
7.208  
7.193  
7.189

20200711-2-Cl-H.4.fid

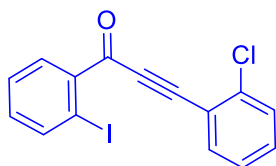

**1g**

$^1\text{H}$  NMR (400 MHz,  $\text{CDCl}_3$ )

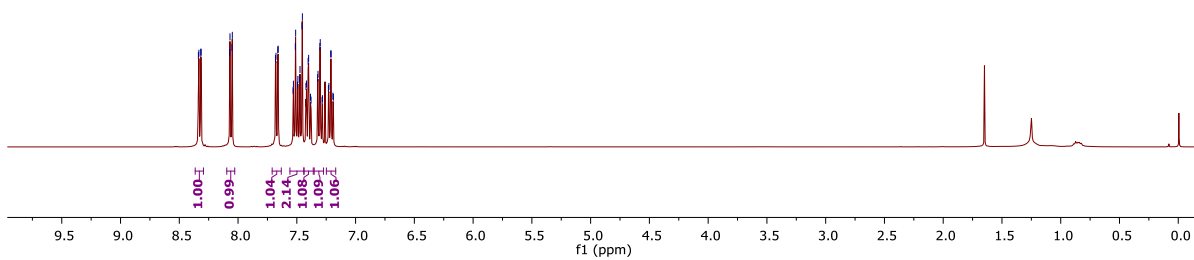

177.103  
142.193  
138.293  
137.431  
134.813  
133.832  
133.517  
131.758  
129.505  
127.944  
126.686  
120.071  
92.695  
90.814  
89.788  
77.200  
76.882  
76.564

20200711-2-Cl-C.5.fid

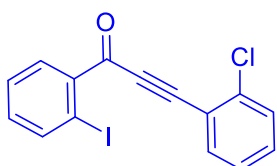

**1g**

$^{13}\text{C}$  NMR (400 MHz,  $\text{CDCl}_3$ )

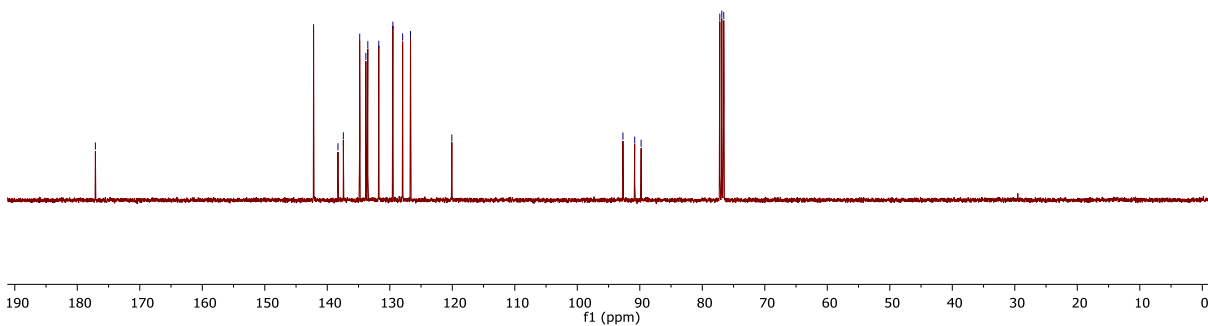

20200711-3-F-H.6.fid

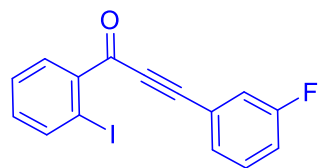

**1h**

$^1\text{H}$  NMR (400 MHz,  $\text{CDCl}_3$ )

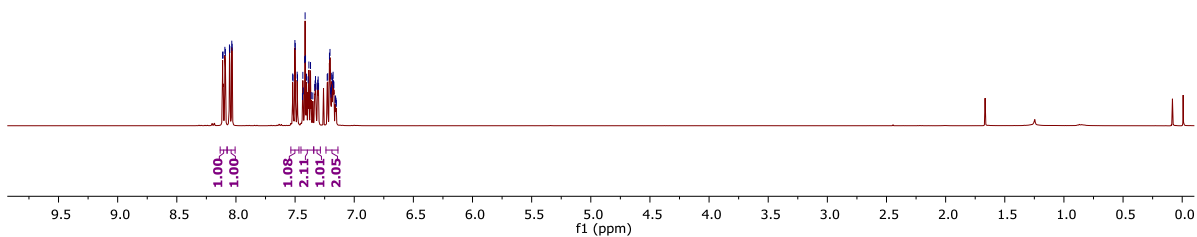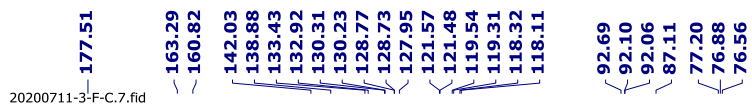

20200711-3-F-C.7.fid

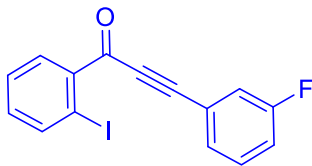

**1h**

$^{13}\text{C}$  NMR (400 MHz,  $\text{CDCl}_3$ )

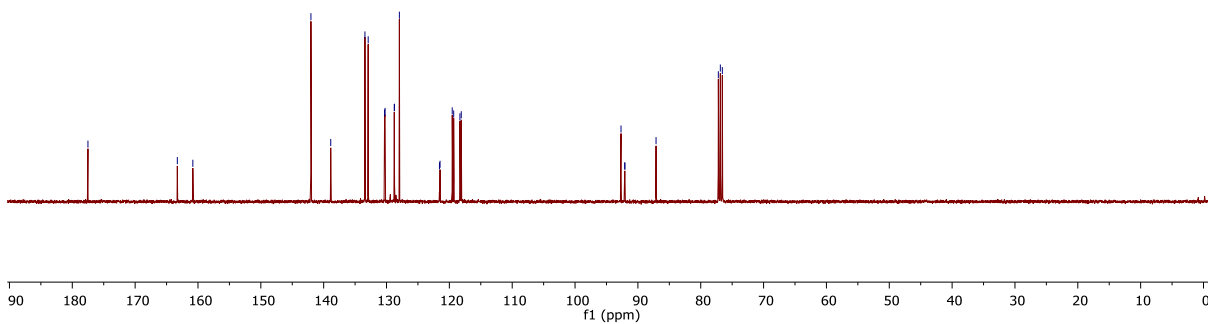

20200711-3Cl-H.6.fid

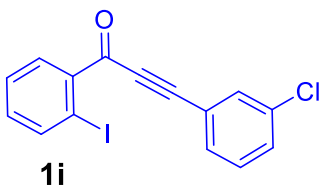

<sup>1</sup>H NMR (400 MHz, CDCl<sub>3</sub>)

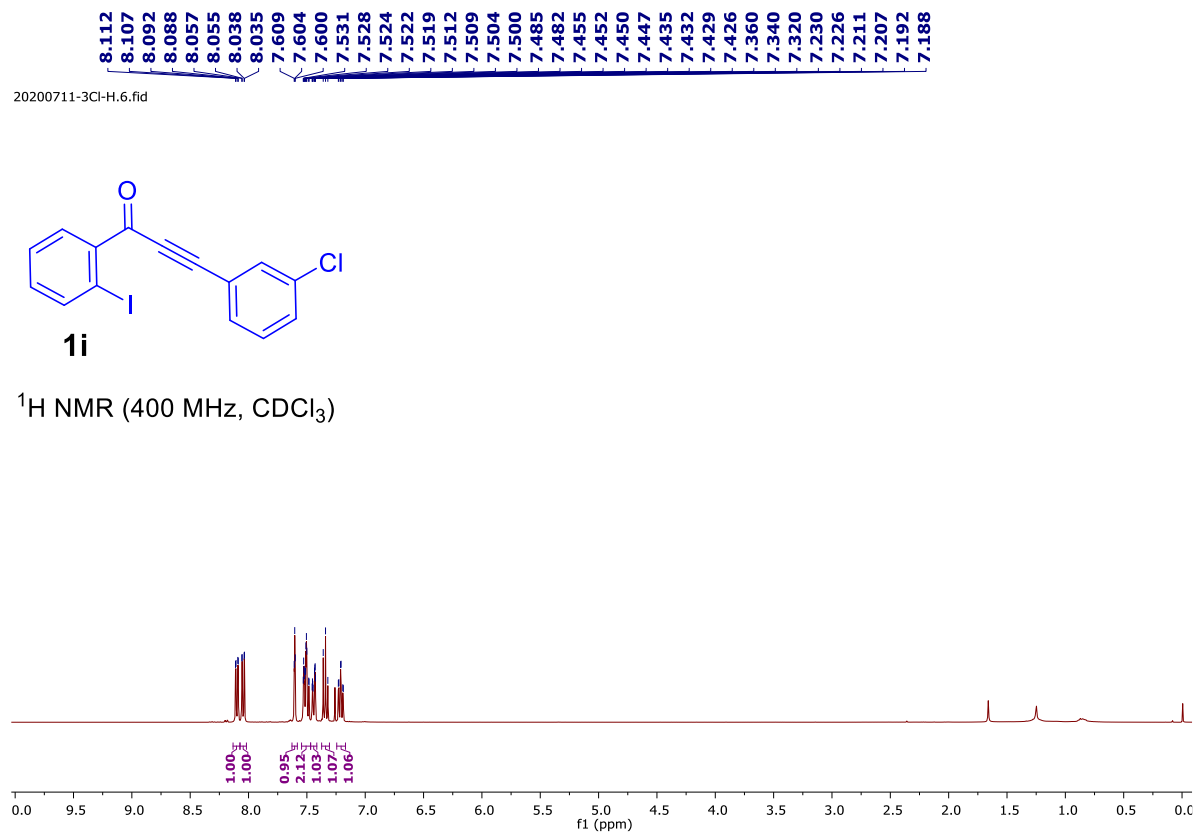

20200711-3Cl-C.7.fid

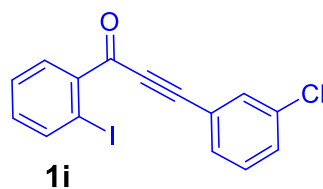

<sup>13</sup>C NMR (400 MHz, CDCl<sub>3</sub>)

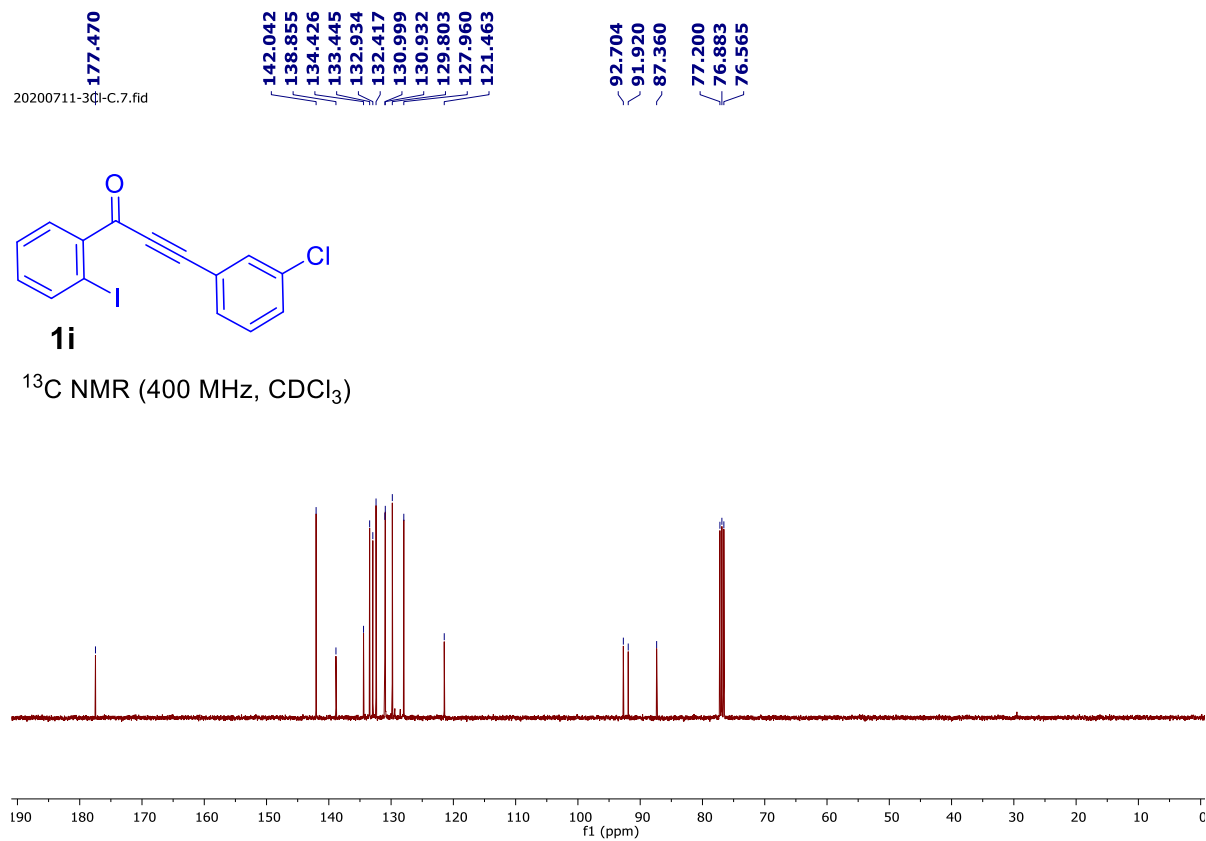

8.112  
8.107  
8.102  
8.096  
8.097  
8.054  
8.037  
8.034  
7.674  
7.667  
7.661  
7.654  
7.649  
7.645  
7.637  
7.632  
7.624  
7.518  
7.515  
7.500  
7.497  
7.481  
7.478  
7.228  
7.224  
7.209  
7.205  
7.190  
7.186  
7.135  
7.128  
7.123  
7.114  
7.111  
7.101  
7.096  
7.090  
7.085  
7.077

20191207-4-F-K-H-7.8.fid

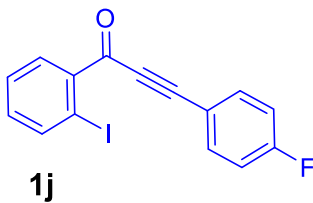

<sup>1</sup>H NMR (400 MHz, CDCl<sub>3</sub>)

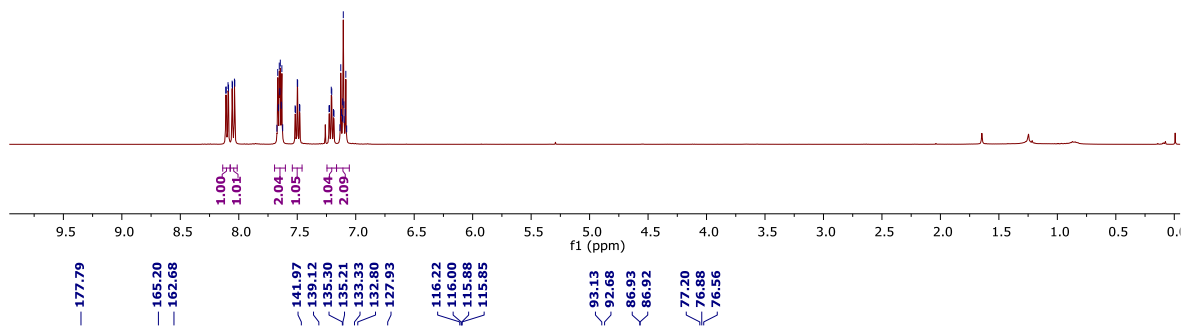

20191207-4-F-K-C-7.22.fid

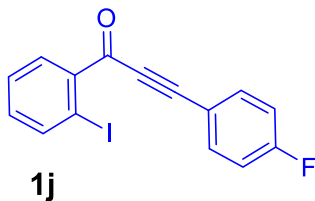

<sup>13</sup>C NMR (400 MHz, CDCl<sub>3</sub>)

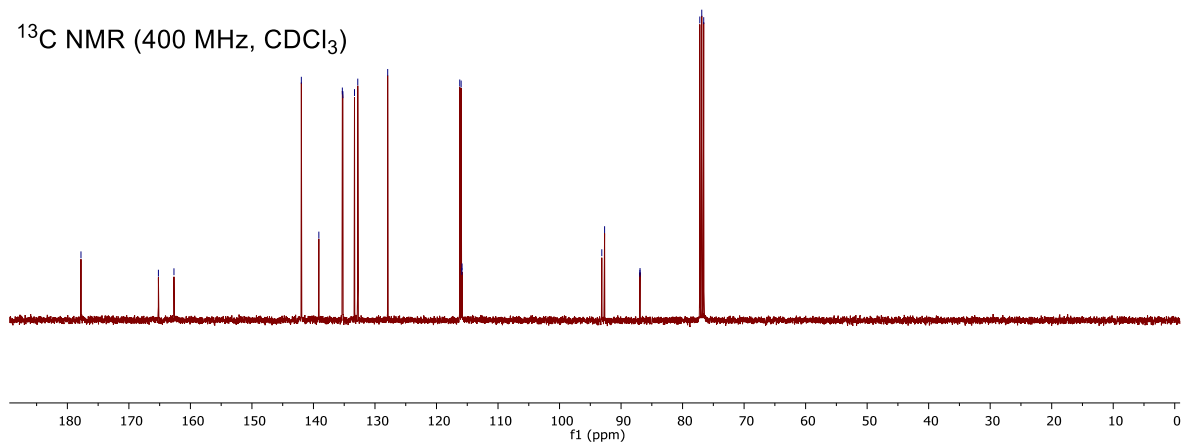

20191207-4-Cl-K-H-8.9.fid

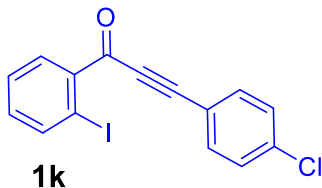

<sup>1</sup>H NMR (400 MHz, CDCl<sub>3</sub>)

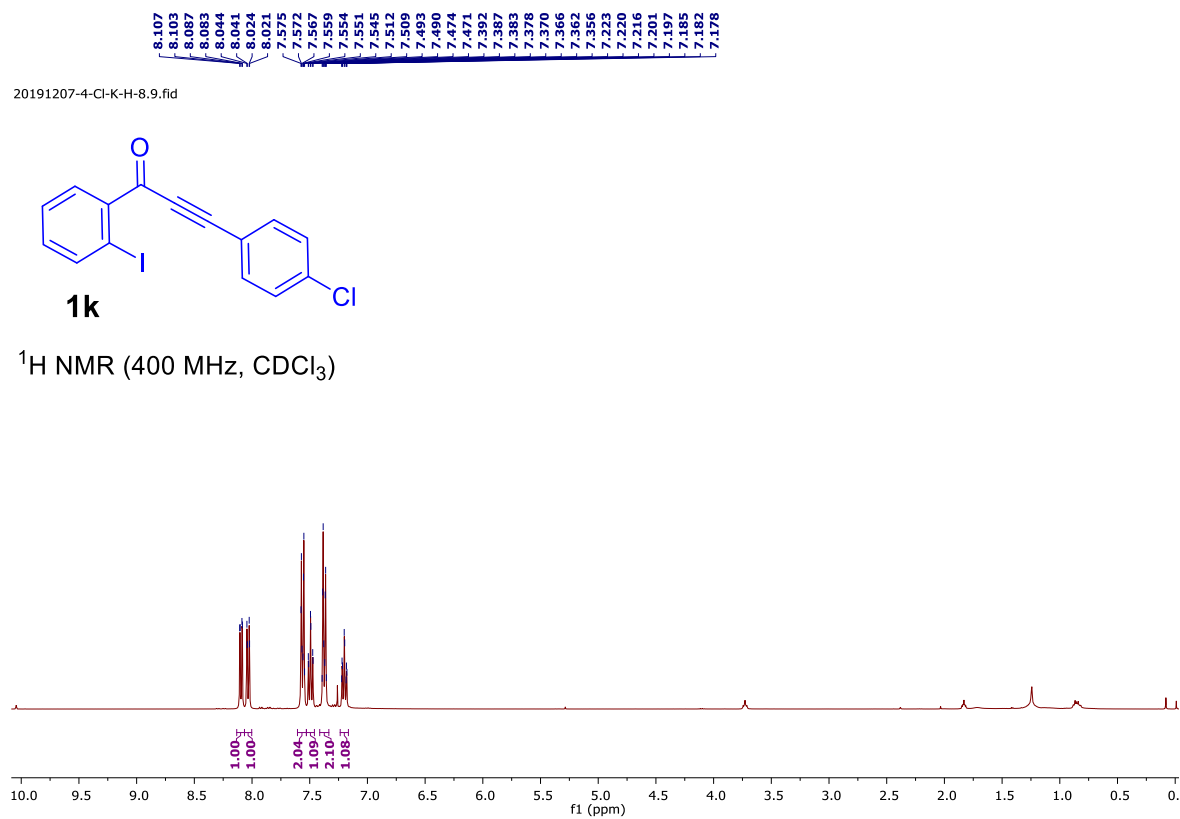

20191207-4-Cl-K-C-8.23.fid

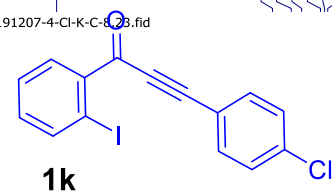

<sup>13</sup>C NMR (400 MHz, CDCl<sub>3</sub>)

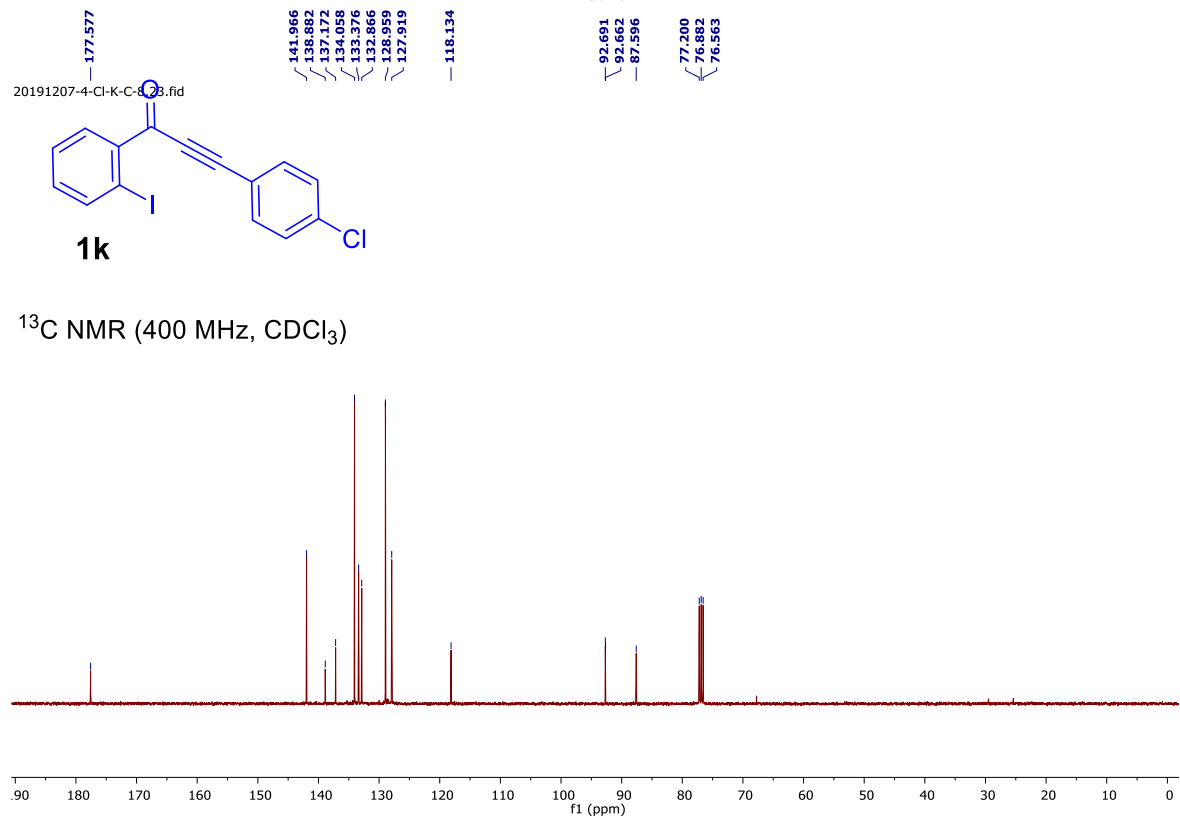

20200713-4-Br-H.5.fid

8.111  
8.107  
8.092  
8.087  
8.072  
8.069  
8.052  
8.049  
7.579  
7.574  
7.569  
7.558  
7.553  
7.548  
7.525  
7.523  
7.518  
7.513  
7.506  
7.503  
7.497  
7.492  
7.487  
7.484  
7.240  
7.235  
7.220  
7.216  
7.202  
7.197

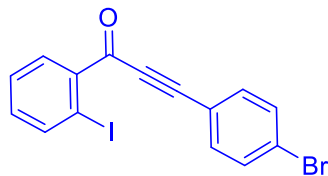

**11**

$^1\text{H}$  NMR (400 MHz,  $\text{CDCl}_3$ )

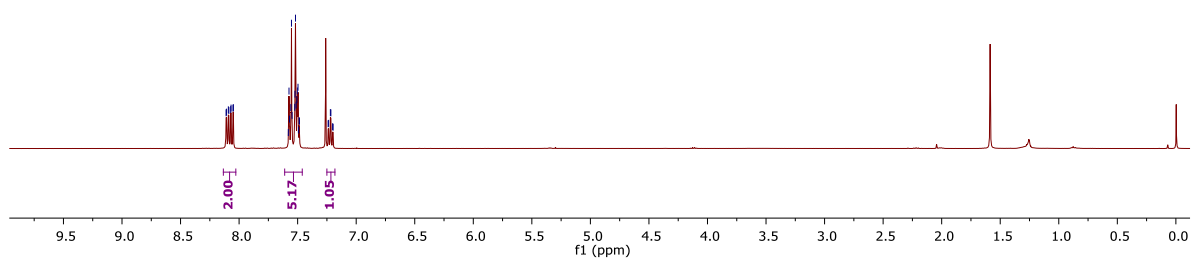

20200713-4-Br-C.6.fid

177.759  
142.058  
139.117  
134.216  
133.416  
132.870  
131.985  
127.970  
125.707  
118.726  
92.803  
92.743  
87.770  
77.200  
76.882  
76.565

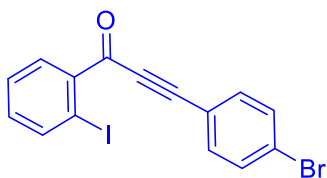

**11**

$^{13}\text{C}$  NMR (400 MHz,  $\text{CDCl}_3$ )

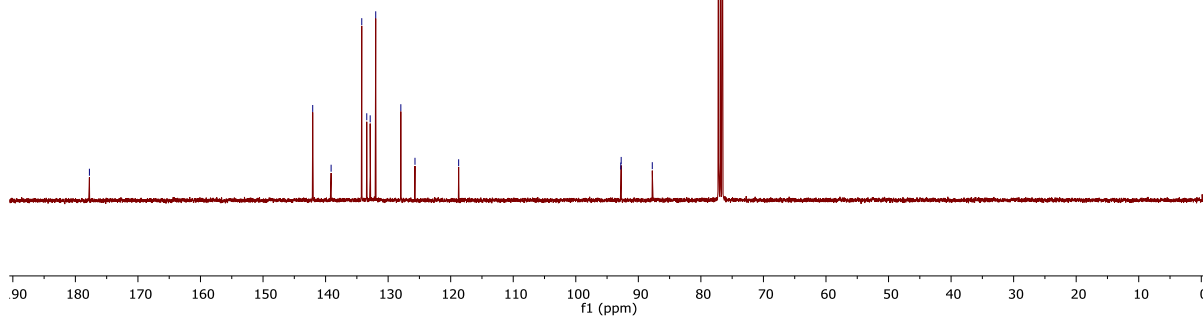

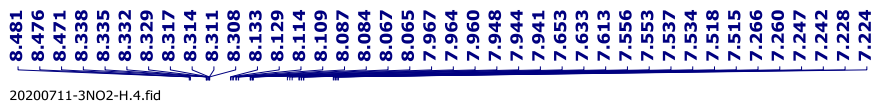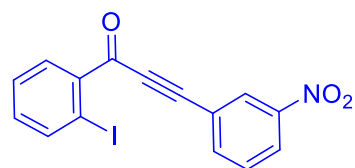

**1m**

$^1\text{H}$  NMR (400 MHz,  $\text{CDCl}_3$ )

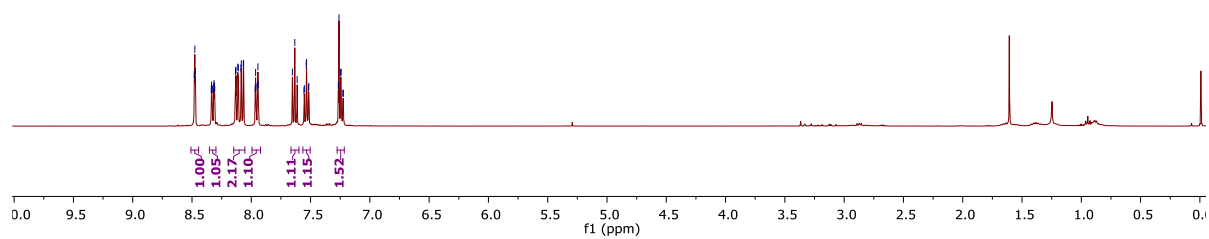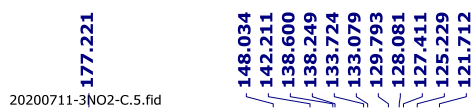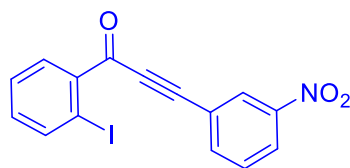

**1m**

$^{13}\text{C}$  NMR (400 MHz,  $\text{CDCl}_3$ )

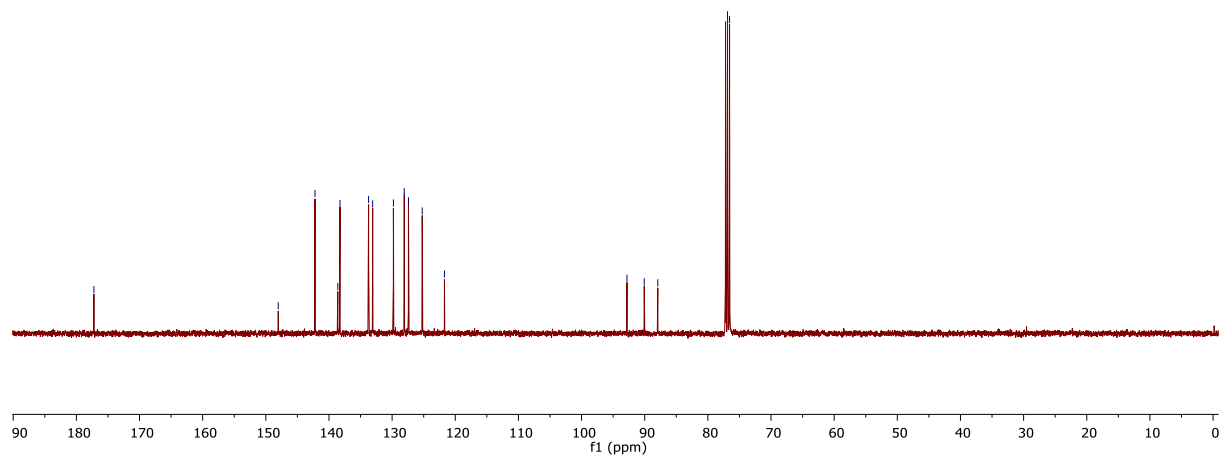

8.296  
8.290  
8.285  
8.273  
8.268  
8.262  
8.120  
8.116  
8.101  
8.097  
8.093  
8.090  
8.073  
8.070  
7.826  
7.820  
7.815  
7.803  
7.798  
7.792  
7.547  
7.544  
7.528  
7.525  
7.509  
7.506  
7.268  
7.264  
7.260  
7.249  
7.245  
7.230  
7.226

20200711-4NO2-H.2.fid

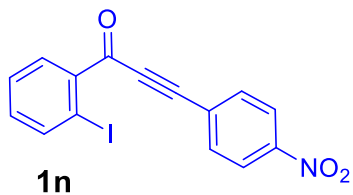

$^1\text{H NMR}$  (400 MHz,  $\text{CDCl}_3$ )

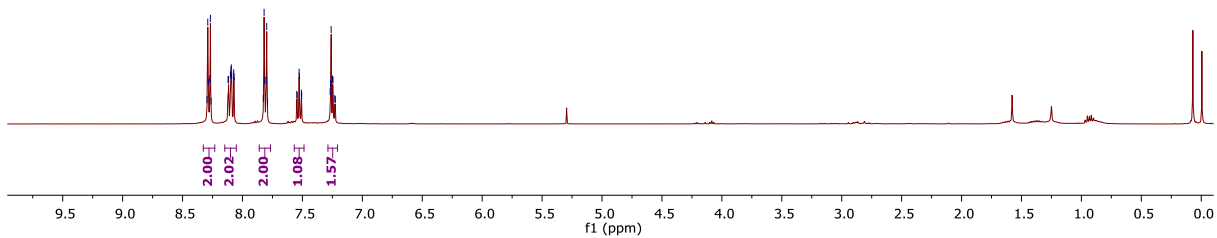

177.230  
148.465  
142.247  
138.610  
133.769  
133.520  
133.070  
128.067  
126.462  
123.694  
92.870  
90.243  
89.724  
77.200  
76.882  
76.564

20200711-4NO2-C.3.fid

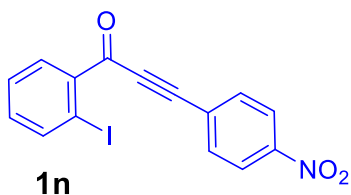

$^{13}\text{C NMR}$  (400 MHz,  $\text{CDCl}_3$ )

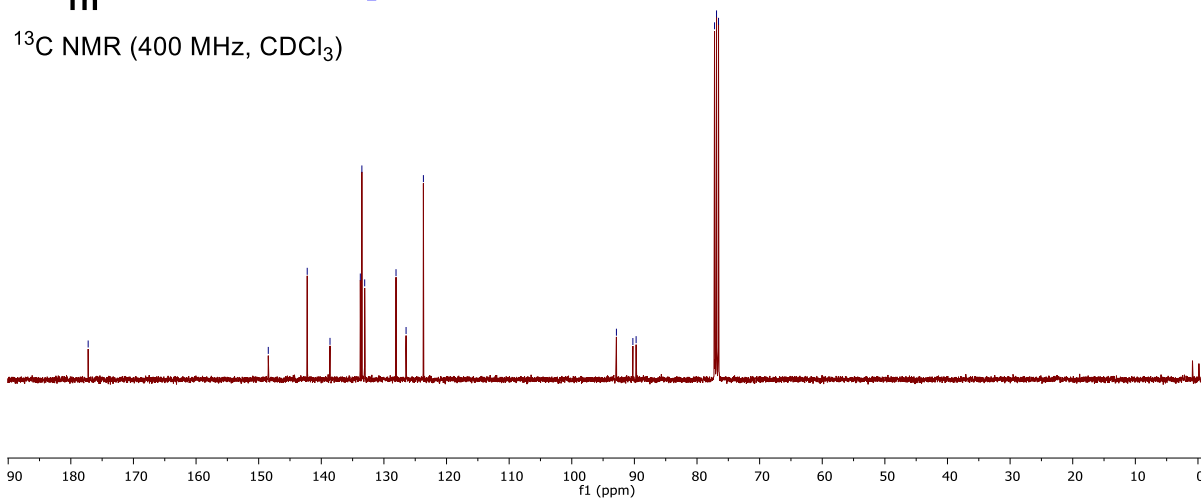



20191209-5-Cyclopropyl-K-H-15.38.fid

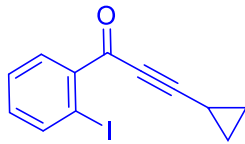

**1o**

$^1\text{H}$  NMR (400 MHz,  $\text{CDCl}_3$ )

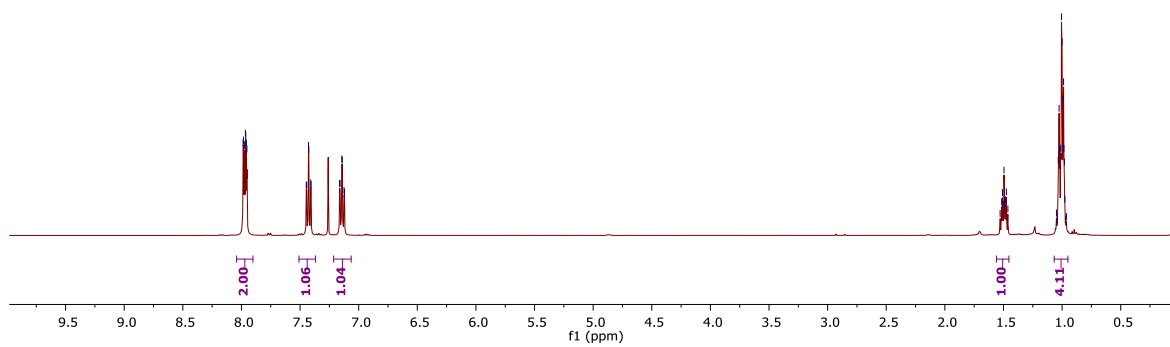

20191209-5-Cyclopropyl-K-C-15.39.fid

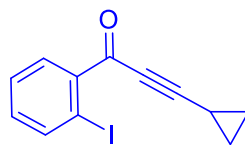

**1o**

$^{13}\text{C}$  NMR (400 MHz,  $\text{CDCl}_3$ )

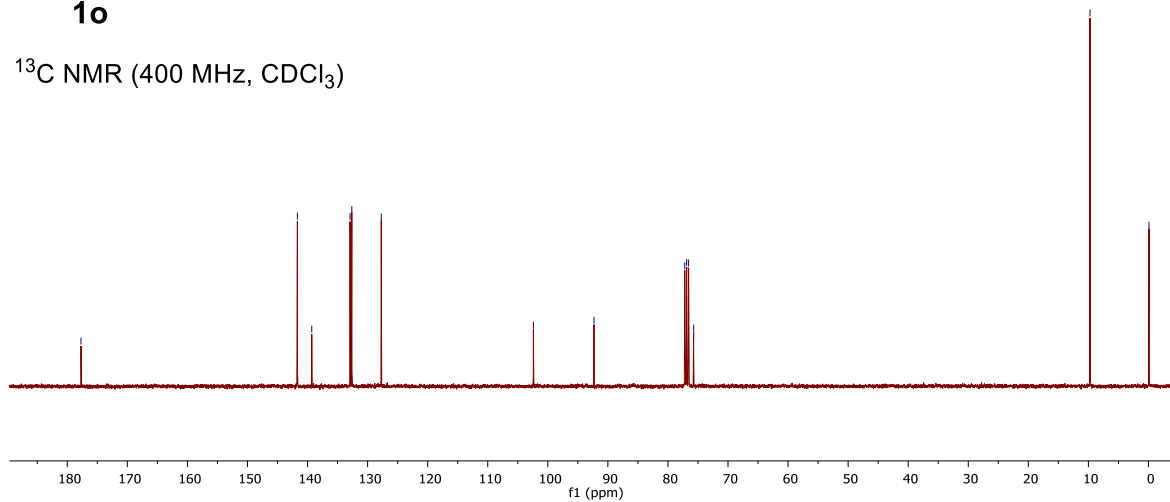

20191207-n-Bu-K-H-6.7.fid

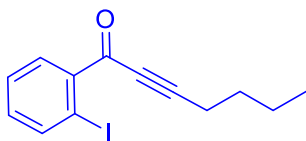

**1p**

<sup>1</sup>H NMR (400 MHz, CDCl<sub>3</sub>)

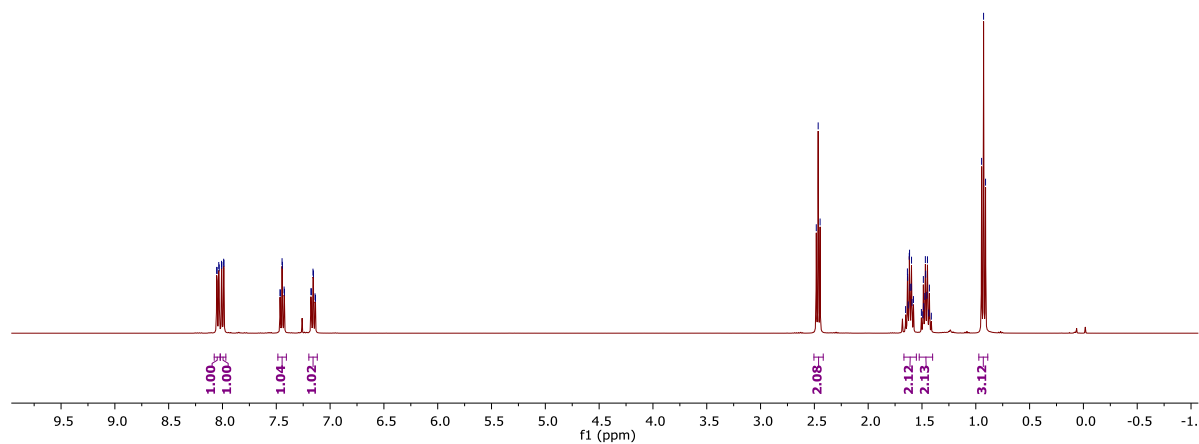

20191207-n-Bu-K-C-6.21.fid

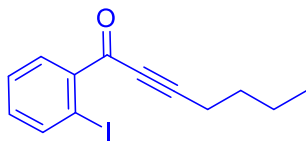

**1p**

<sup>13</sup>C NMR (400 MHz, CDCl<sub>3</sub>)

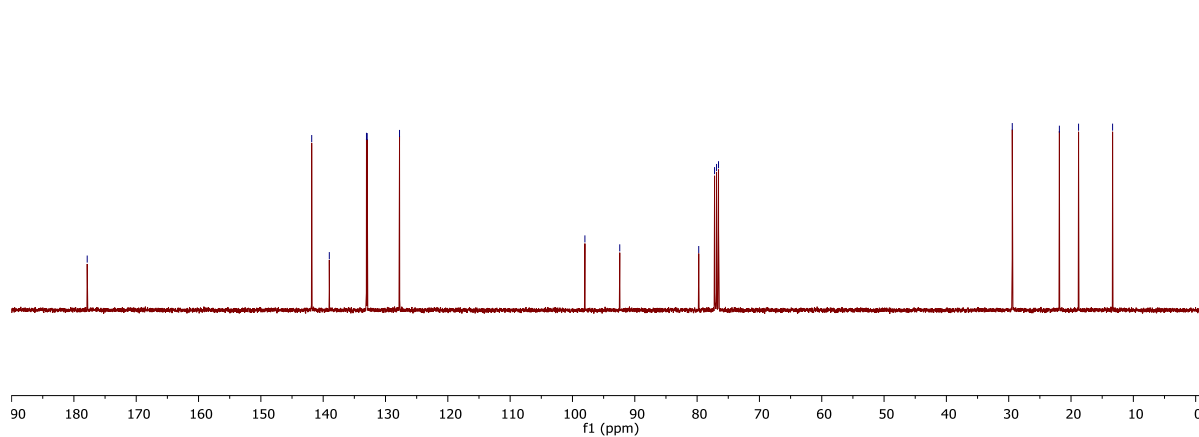

8.057  
8.033  
8.034  
8.004  
7.984  
7.459  
7.440  
7.422  
7.175  
7.172  
7.168  
7.156  
7.152  
7.137  
7.133

2.470  
2.452  
2.434  
1.666  
1.648  
1.630  
1.612  
1.593  
1.496  
1.430  
1.423  
1.413  
1.408  
1.399  
1.389  
1.372  
1.354  
1.336  
1.318  
1.299  
1.282  
0.912  
0.894  
0.876

20200124-4-H.30.fid

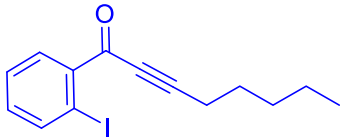

**1q**

<sup>1</sup>H NMR (400 MHz, CDCl<sub>3</sub>)

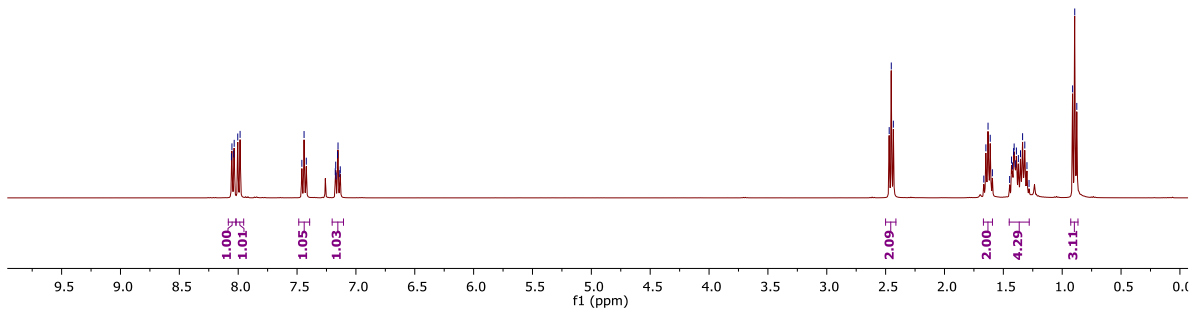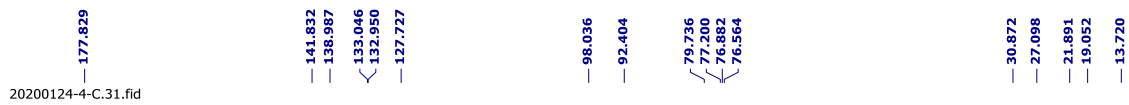

20200124-4-C.31.fid

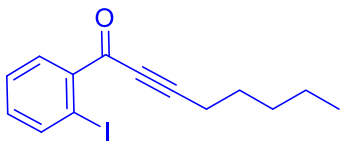

**1q**

<sup>13</sup>C NMR (400 MHz, CDCl<sub>3</sub>)

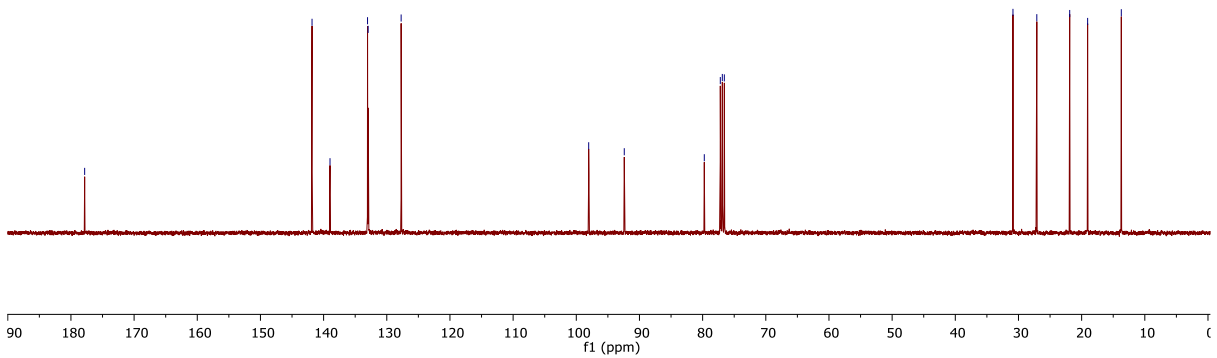

20200124-6-H.34.fid

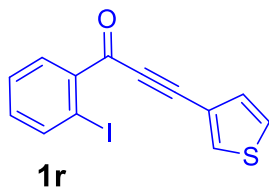

<sup>1</sup>H NMR (400 MHz, CDCl<sub>3</sub>)

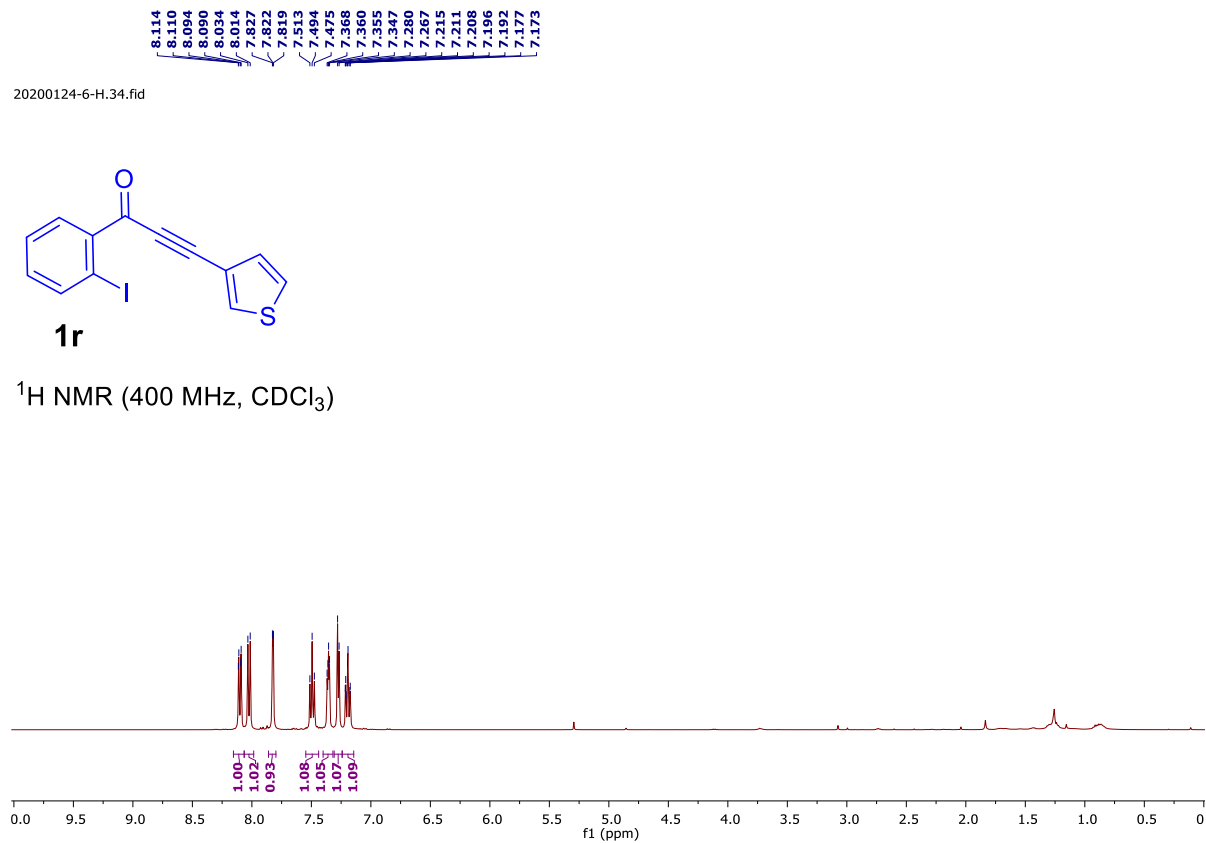

20200124-6-C.35.fid

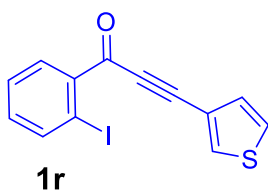

<sup>13</sup>C NMR (400 MHz, CDCl<sub>3</sub>)

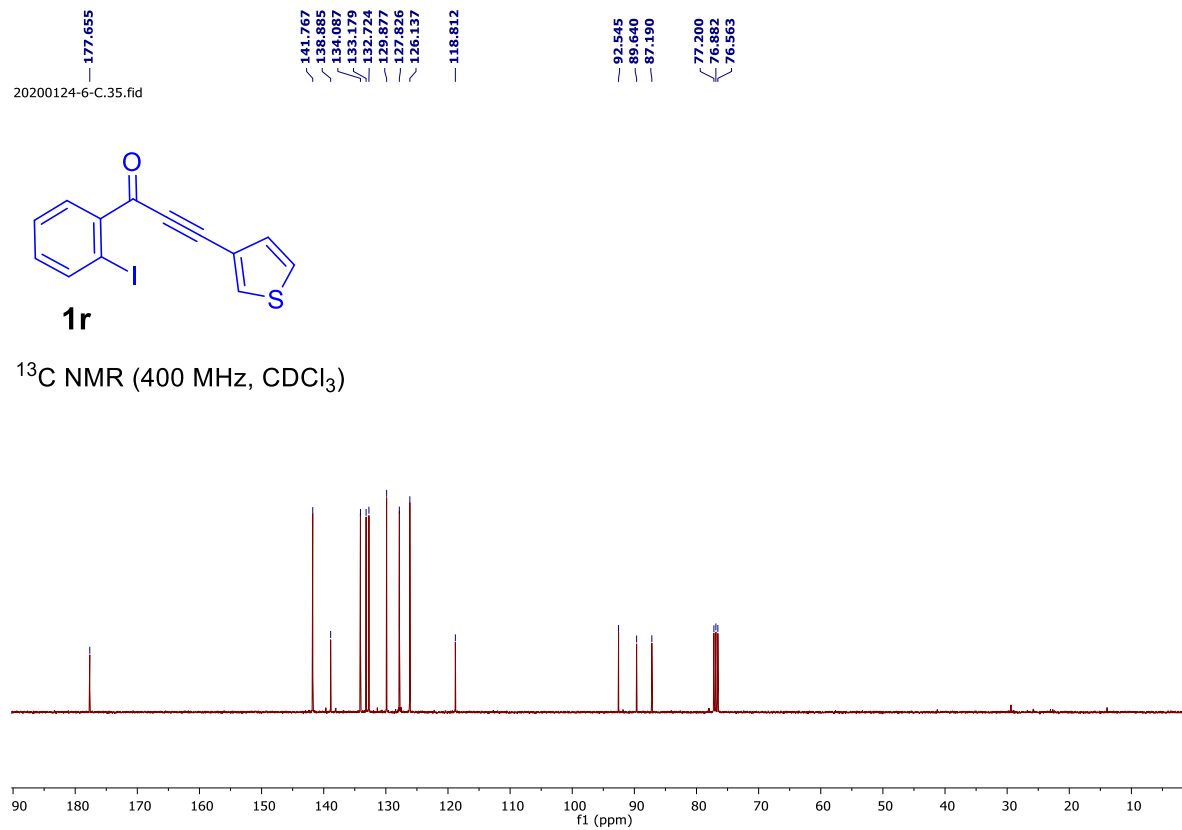

8.864  
8.862  
8.859  
8.857  
8.886  
8.851  
8.669  
8.138  
8.123  
8.108  
8.104  
8.070  
8.067  
8.050  
8.047  
7.946  
7.941  
7.936  
7.926  
7.921  
7.917  
7.532  
7.529  
7.514  
7.511  
7.495  
7.492  
7.380  
7.378  
7.368  
7.365  
7.360  
7.358  
7.348  
7.346  
7.245  
7.241  
7.226  
7.222  
7.207  
7.203

20191207-Pyri-K-H-9.10.fid

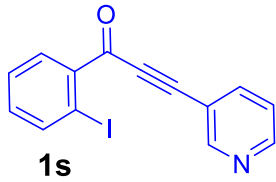

<sup>1</sup>H NMR (400 MHz, CDCl<sub>3</sub>)

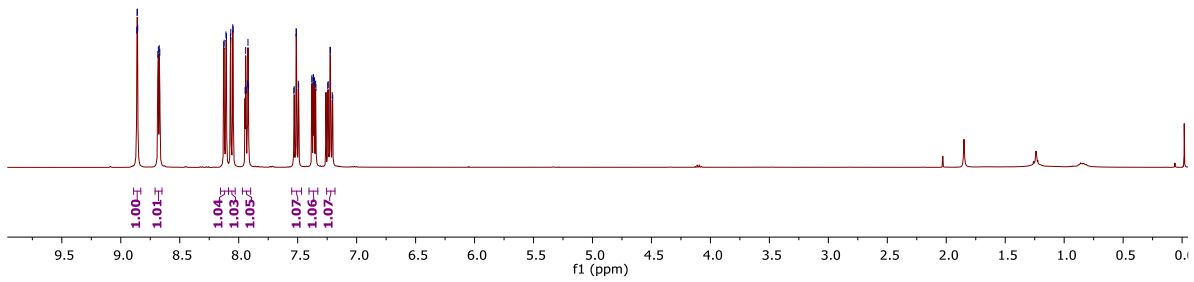

177.383  
153.097  
150.760  
142.116  
136.726  
136.676  
133.593  
133.012  
128.007  
123.152  
117.154  
82.783  
80.051  
89.327  
77.200  
76.882  
76.564

20191207-Pyri-K-C-9.24.fid

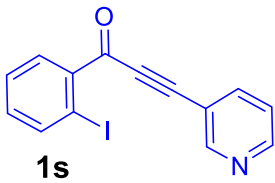

<sup>13</sup>C NMR (400 MHz, CDCl<sub>3</sub>)

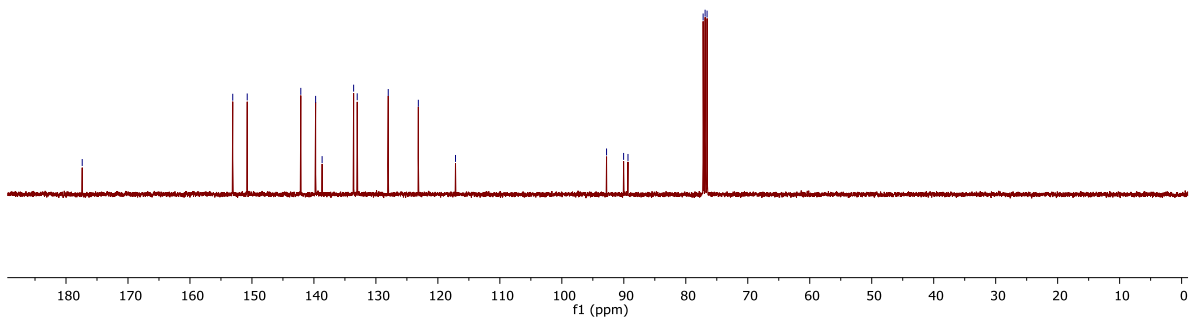

8.226  
8.200  
8.181  
8.087  
8.067  
7.875  
7.855  
7.655  
7.634  
7.602  
7.585  
7.582  
7.574  
7.568  
7.552  
7.534  
7.515  
7.252  
7.248  
7.244  
7.229  
7.225  
7.213  
7.209  
7.206

20200718-S22S15-H.20.fid

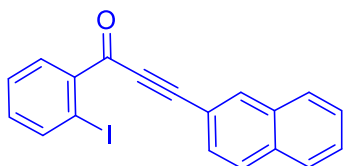

**1t**

<sup>1</sup>H NMR (400 MHz, CDCl<sub>3</sub>)

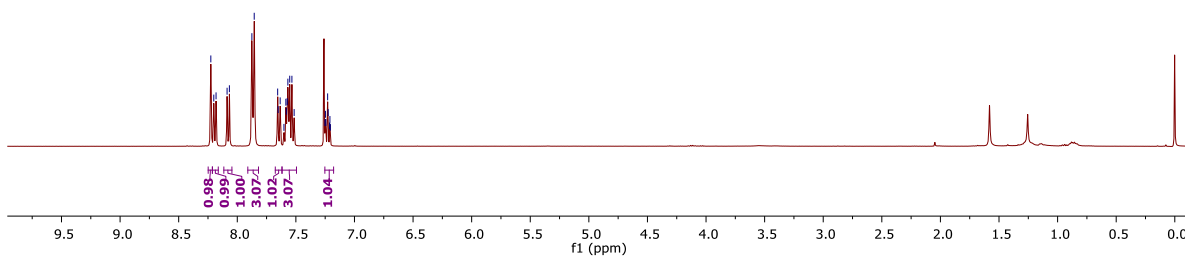

177.956  
142.010  
139.388  
134.372  
133.881  
133.289  
132.900  
132.520  
128.398  
128.191  
128.130  
128.011  
127.970  
127.796  
126.957  
116.979  
94.806  
92.736  
87.336  
77.201  
76.884  
76.566

20200718-S22S15-Q1.41.fid

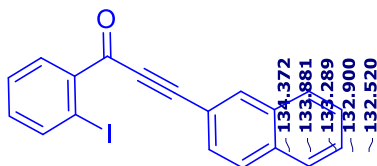

**1t**

<sup>13</sup>C NMR (400 MHz, CDCl<sub>3</sub>)

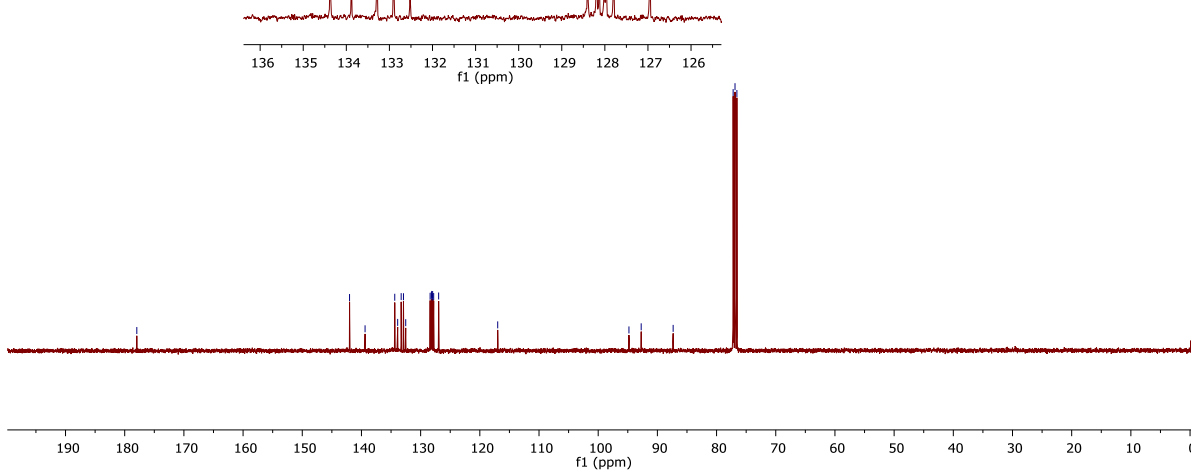

8.620  
8.609  
8.600  
8.596  
8.589  
8.568  
8.391  
8.387  
8.379  
8.375  
8.367  
8.261  
8.256  
8.254  
8.237  
8.149  
8.091  
8.071  
8.071  
7.839  
7.819  
7.708  
7.704  
7.700  
7.688  
7.684  
7.674  
7.666  
7.666  
7.661  
7.648  
7.610  
7.592  
7.573  
7.563  
7.544  
7.525  
7.284  
7.240  
7.225  
7.221  
7.206  
7.202

20200129-5-H.56.fid

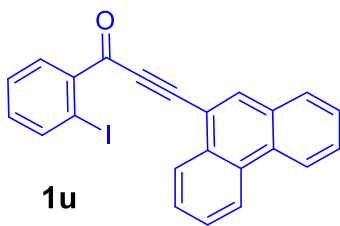

<sup>1</sup>H NMR (400 MHz, CDCl<sub>3</sub>)

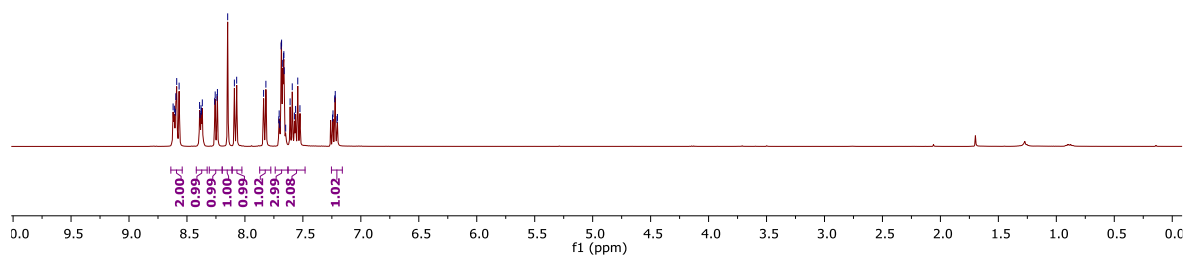

177.678  
141.974  
138.132  
133.290  
132.897  
131.056  
130.363  
130.243  
129.707  
128.944  
128.722  
127.954  
127.355  
127.340  
127.027  
126.284  
122.694  
122.489  
116.066  
92.805  
92.721  
91.187  
77.200  
76.882  
76.564

20200129-5-C.57.fid

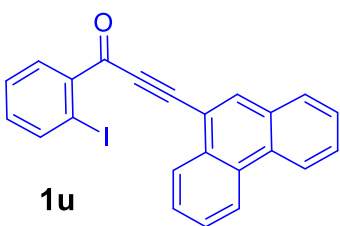

<sup>13</sup>C NMR (400 MHz, CDCl<sub>3</sub>)

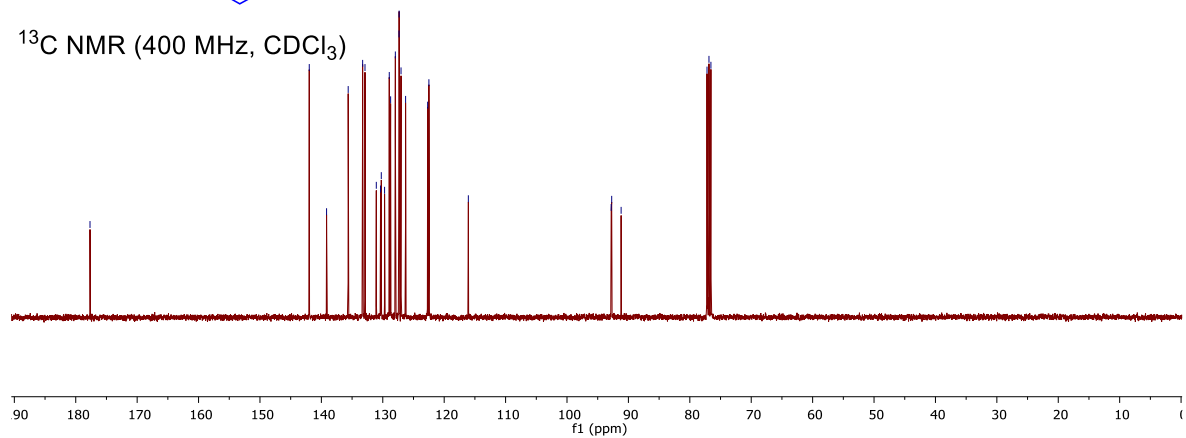

20200124-7-H.36.fid

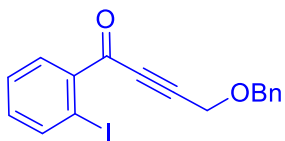

**1v**

$^1\text{H}$  NMR (400 MHz,  $\text{CDCl}_3$ )

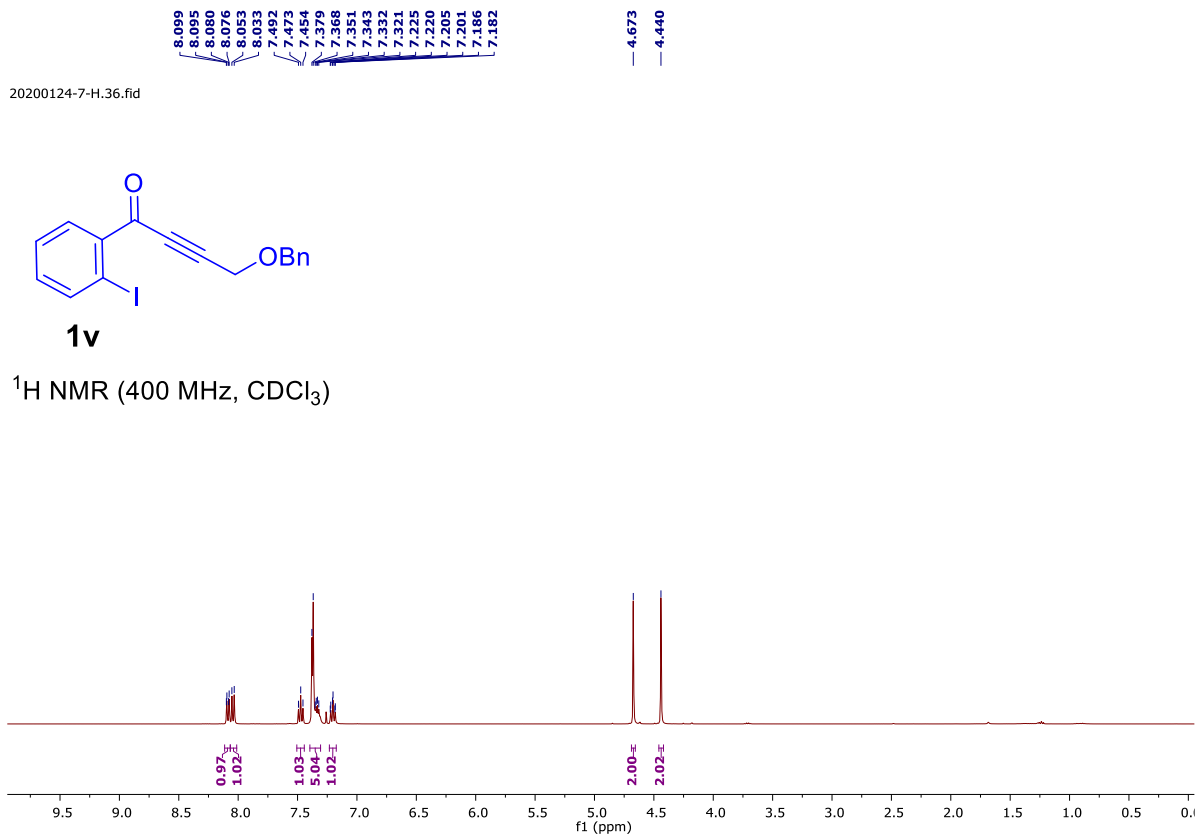

20200124-7-C.37.fid

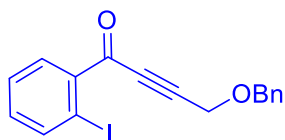

**1v**

$^{13}\text{C}$  NMR (400 MHz,  $\text{CDCl}_3$ )

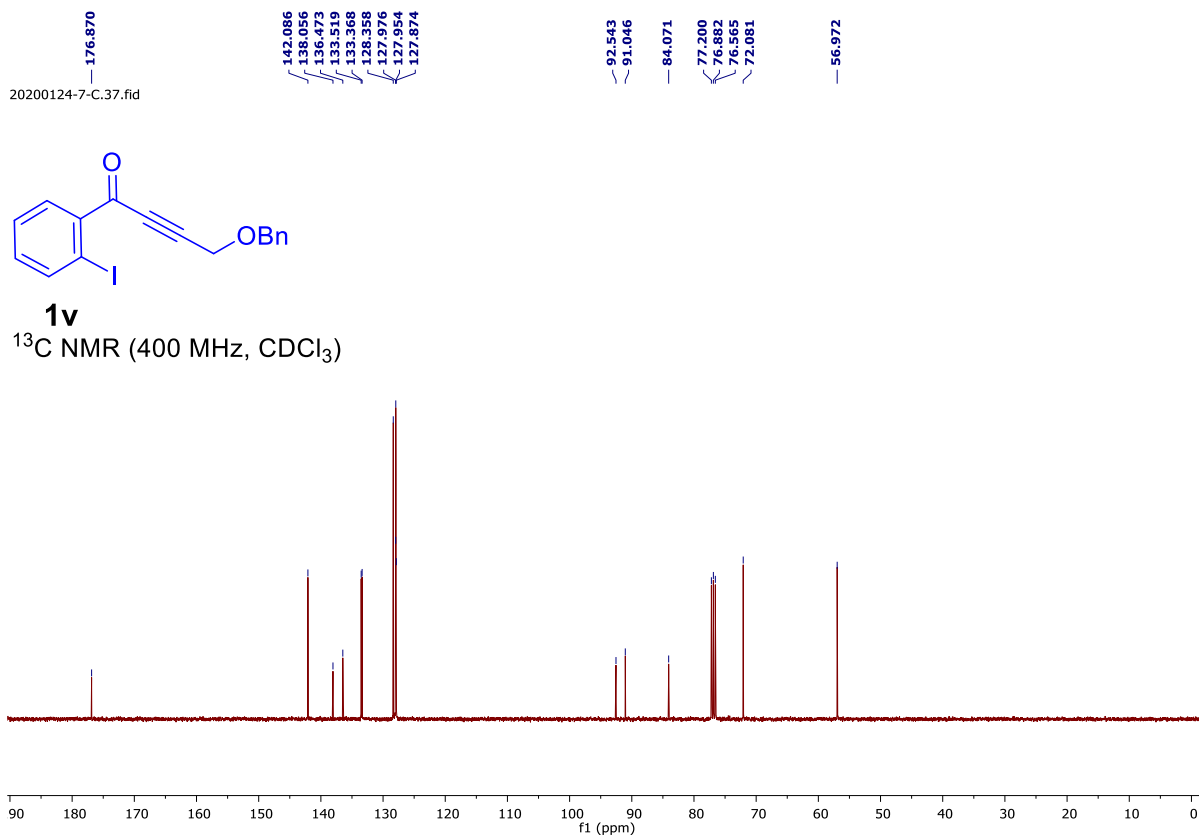



20191209-5-Br-Phe-K-H-13.36.fid

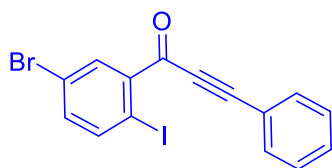

**1ab**

$^1\text{H}$  NMR (400 MHz,  $\text{CDCl}_3$ )

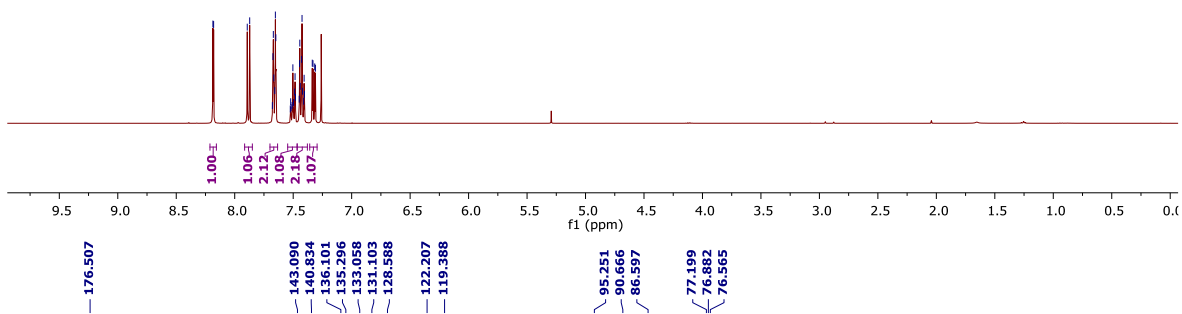

20191210-5BrPhe-K-C-13.75.fid

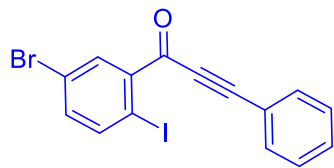

**1ab**

$^{13}\text{C}$  NMR (400 MHz,  $\text{CDCl}_3$ )

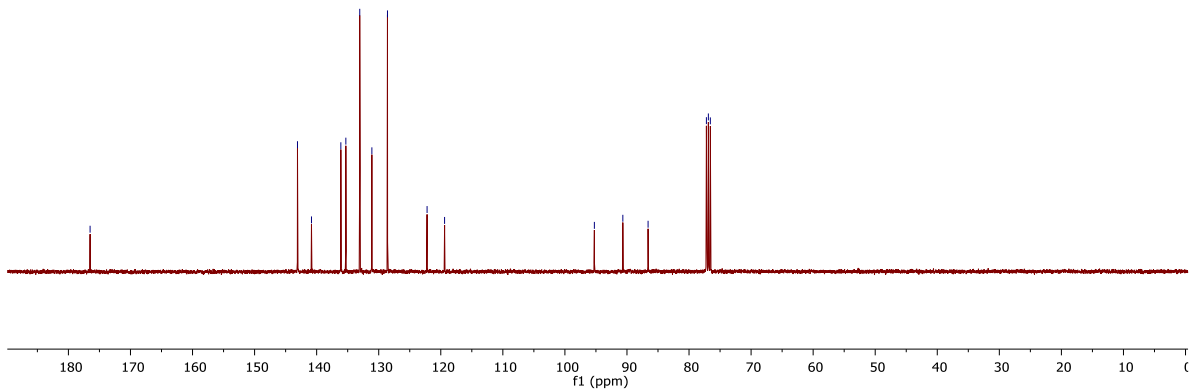

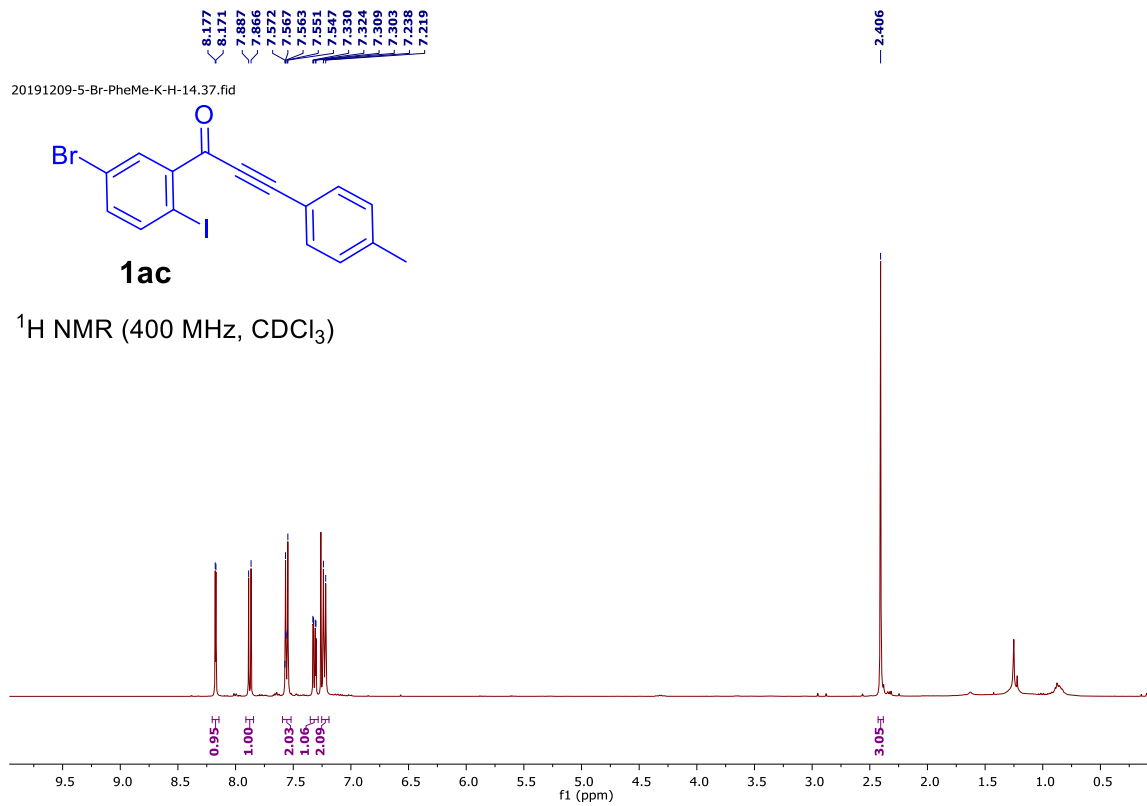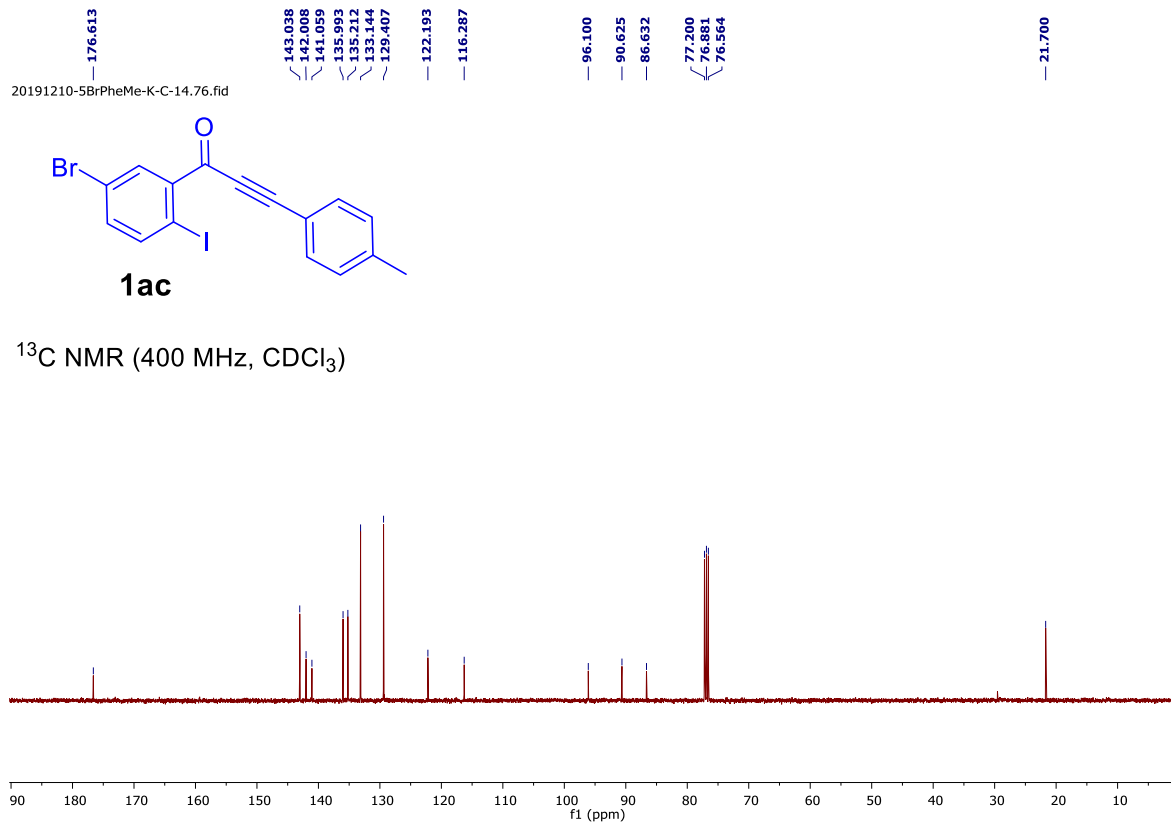

20200129-2-H.50.fid

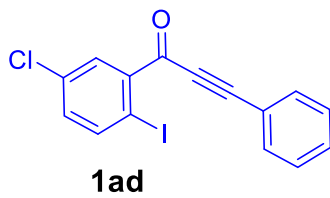

<sup>1</sup>H NMR (400 MHz, CDCl<sub>3</sub>)

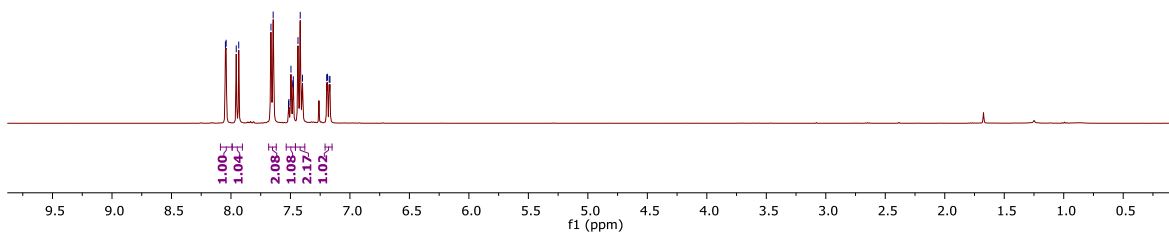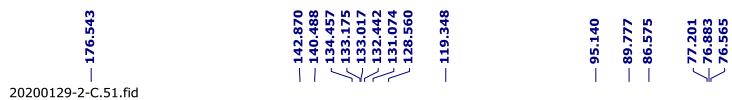

20200129-2-C.51.fid

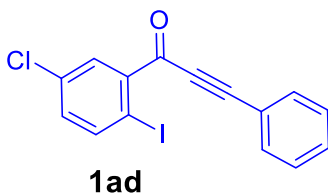

<sup>13</sup>C NMR (400 MHz, CDCl<sub>3</sub>)

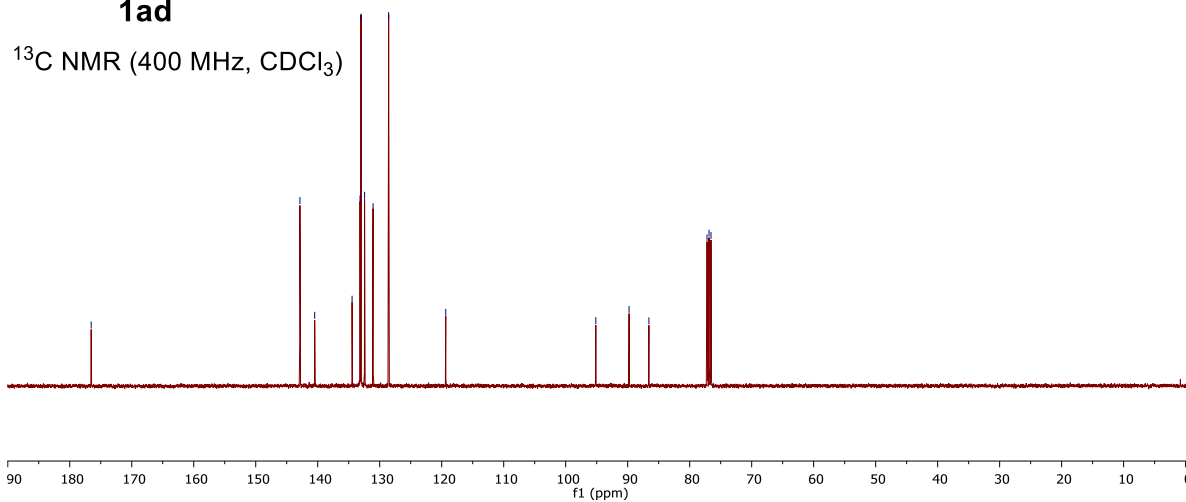

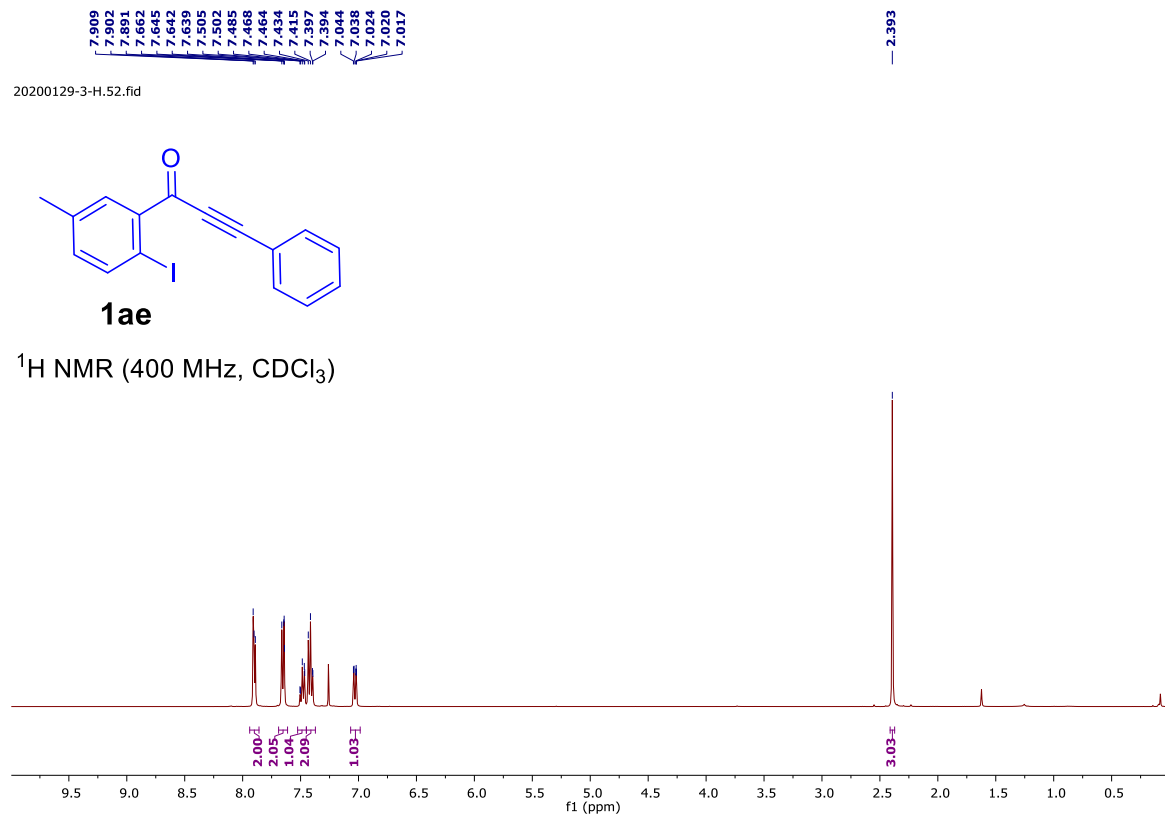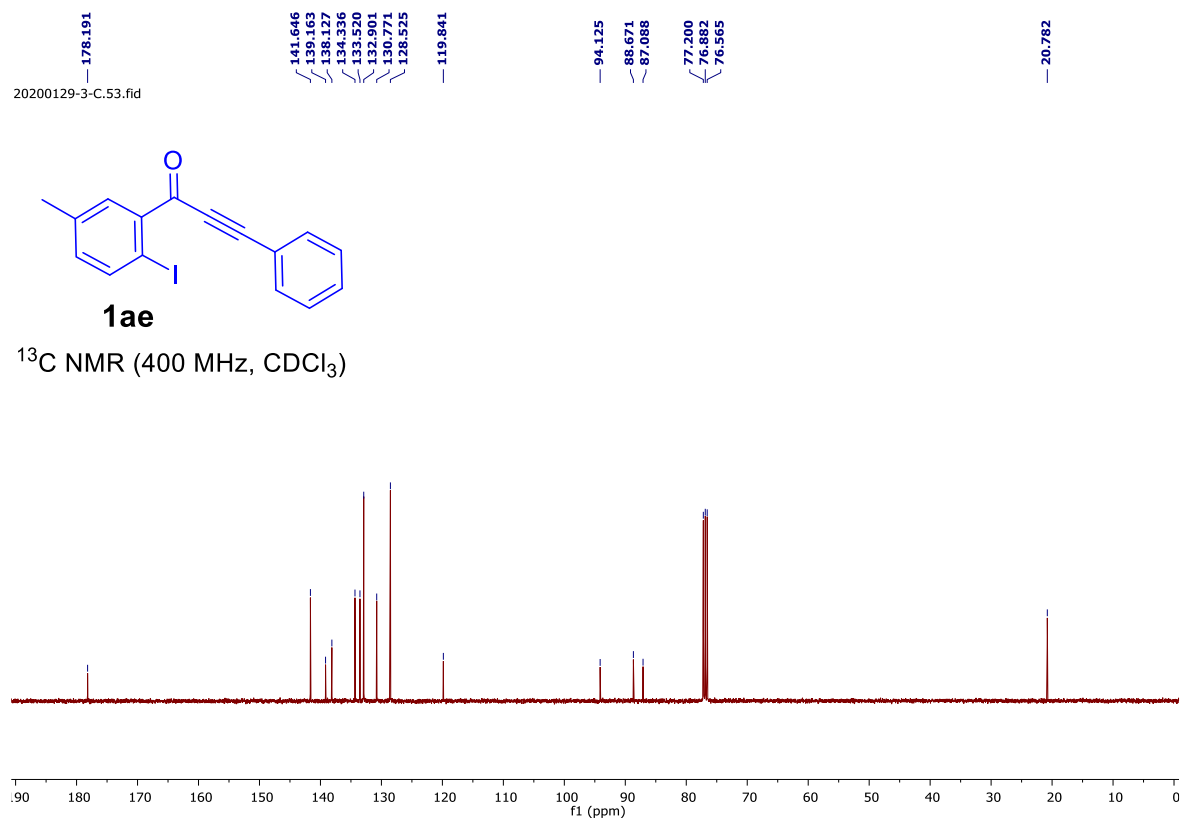

20200124-1-H.24.fid

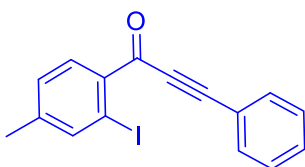

**1af**

$^1\text{H}$  NMR (400 MHz,  $\text{CDCl}_3$ )

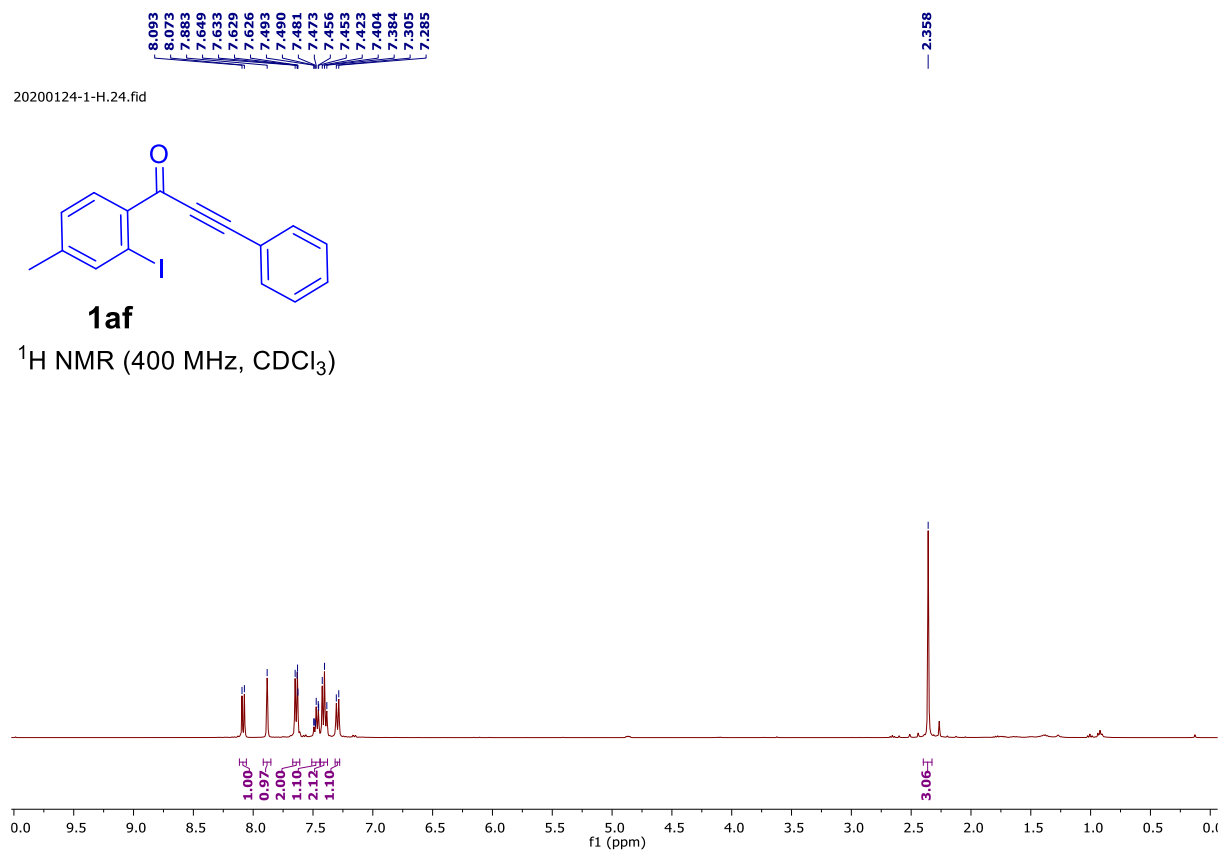

20200124-1-C.25.fid

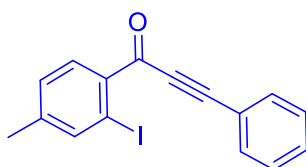

**1af**

$^{13}\text{C}$  NMR (400 MHz,  $\text{CDCl}_3$ )

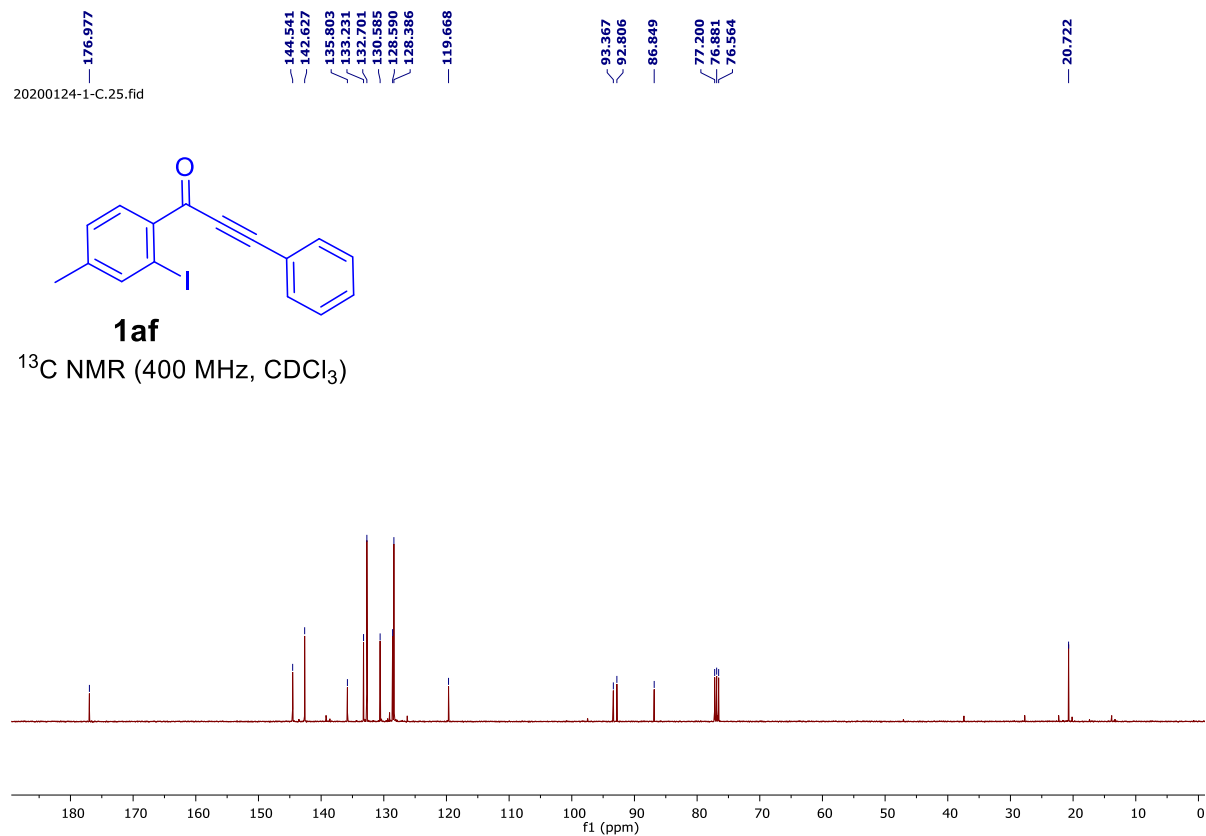

7.916  
7.893  
7.738  
7.721  
7.664  
7.642  
7.550  
7.466  
7.448  
7.427  
7.156  
7.137  
7.118

20191212-P22P1-H1.2.fid

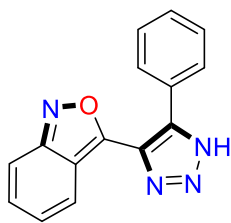

**2a**

$^1\text{H}$  NMR (400 MHz,  $\text{DMSO}-d_6$ )

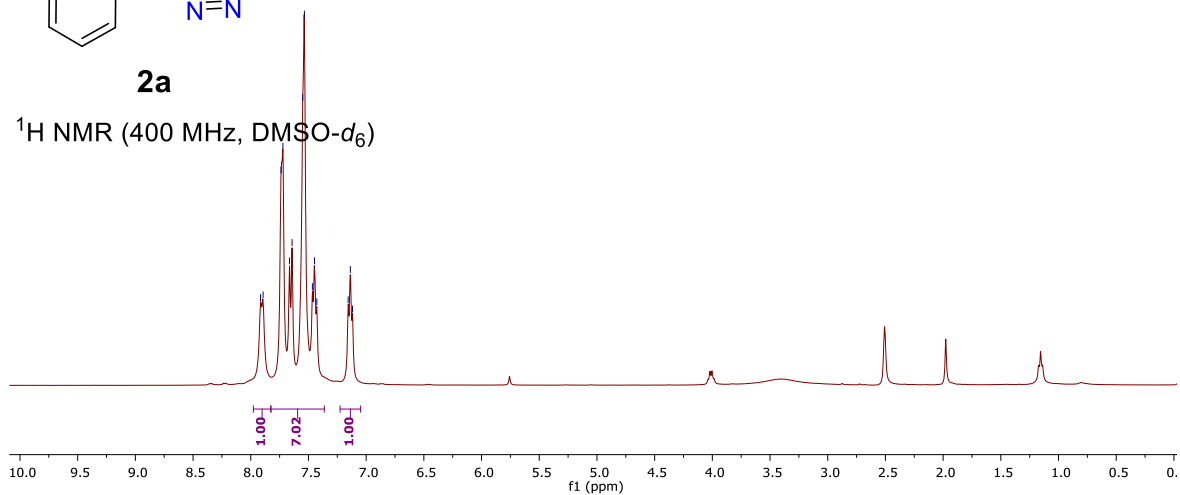

157.135  
155.993  
131.233  
128.945  
128.142  
128.031  
124.371  
120.770  
114.721  
113.833

20191212-P22P1-C1.3.fid

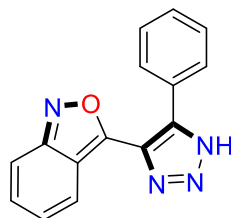

**2a**

$^{13}\text{C}\{^1\text{H}\}$  NMR (100 MHz,  $\text{DMSO}-d_6$ )

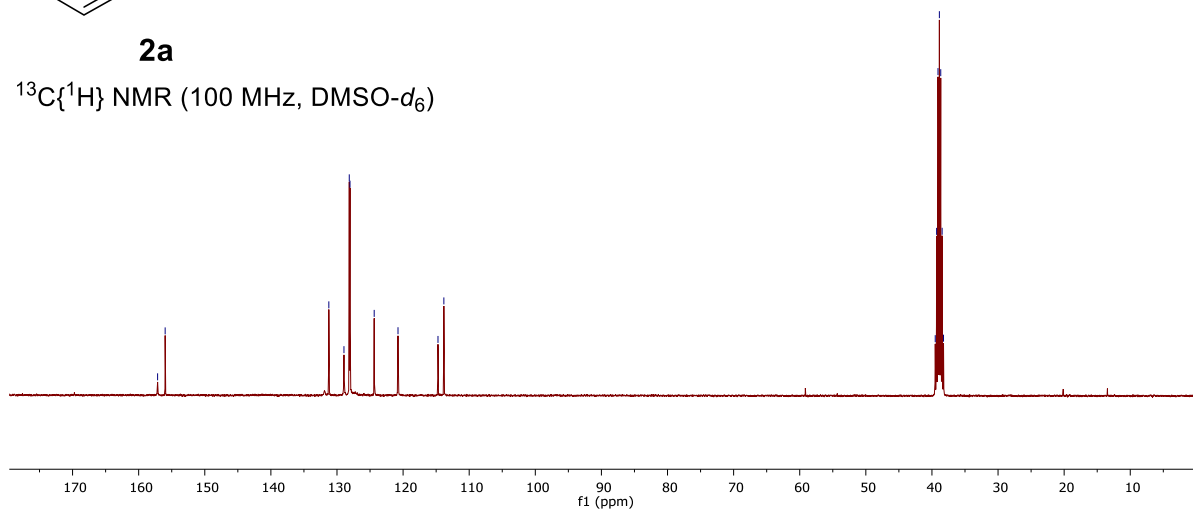

20200125-P22P2-H.41.fid

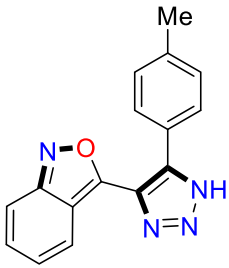

**2b**

$^1\text{H}$  NMR (400 MHz, DMSO- $d_6$ )

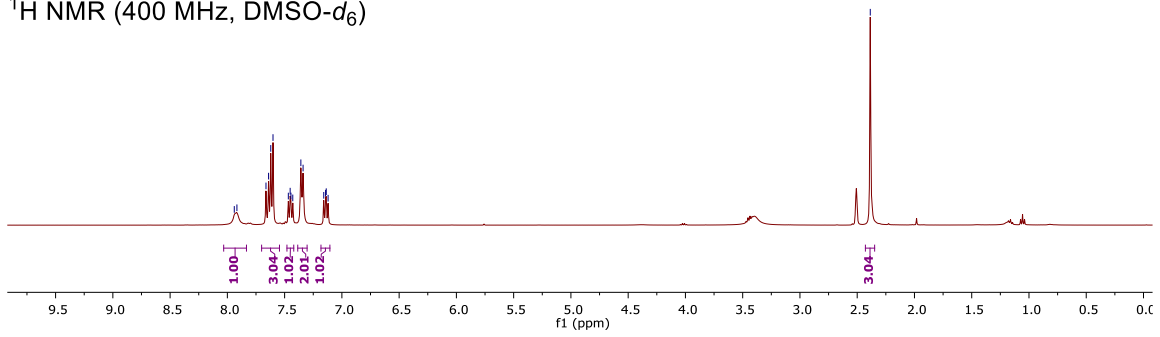

20200125-P22P2-C.42.fid

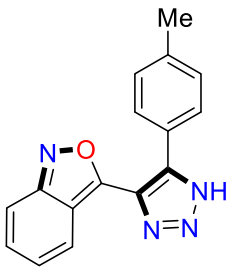

**2b**

$^{13}\text{C}\{^1\text{H}\}$  NMR (100 MHz, DMSO- $d_6$ )

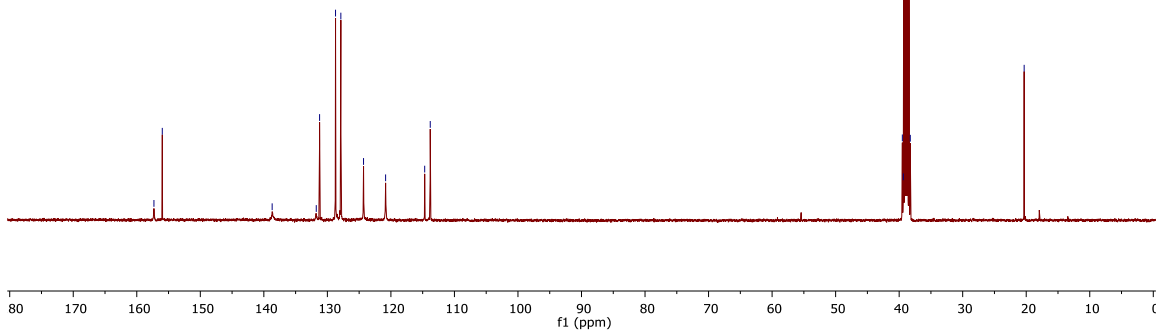

20191214-P22P3-H.3.fid  
1

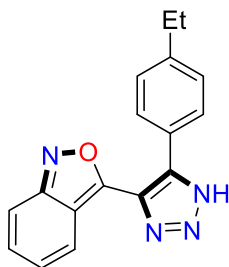

**2c**

$^1\text{H}$  NMR (400 MHz,  $\text{CD}_2\text{Cl}_2$ )

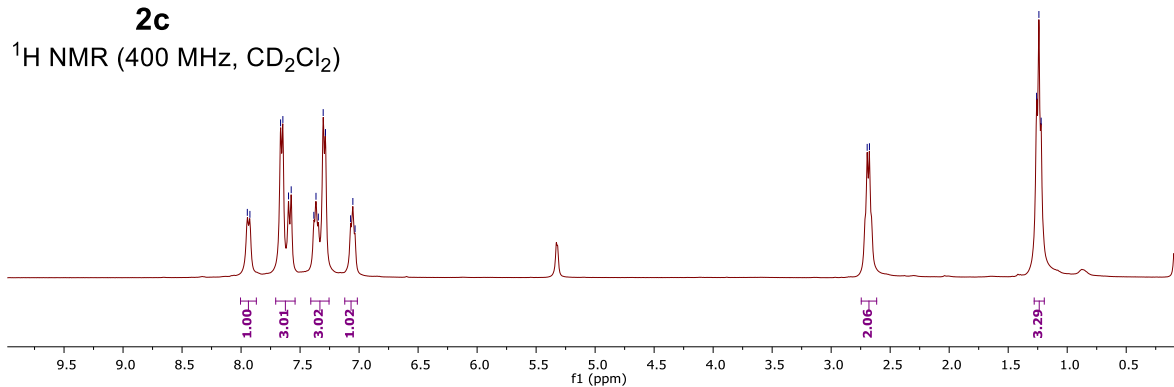

20200125-P22P3-C.40.fid

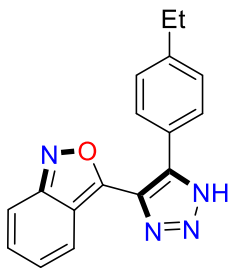

**2c**

$^{13}\text{C}\{^1\text{H}\}$  NMR (100 MHz,  $\text{CD}_2\text{Cl}_2$ )

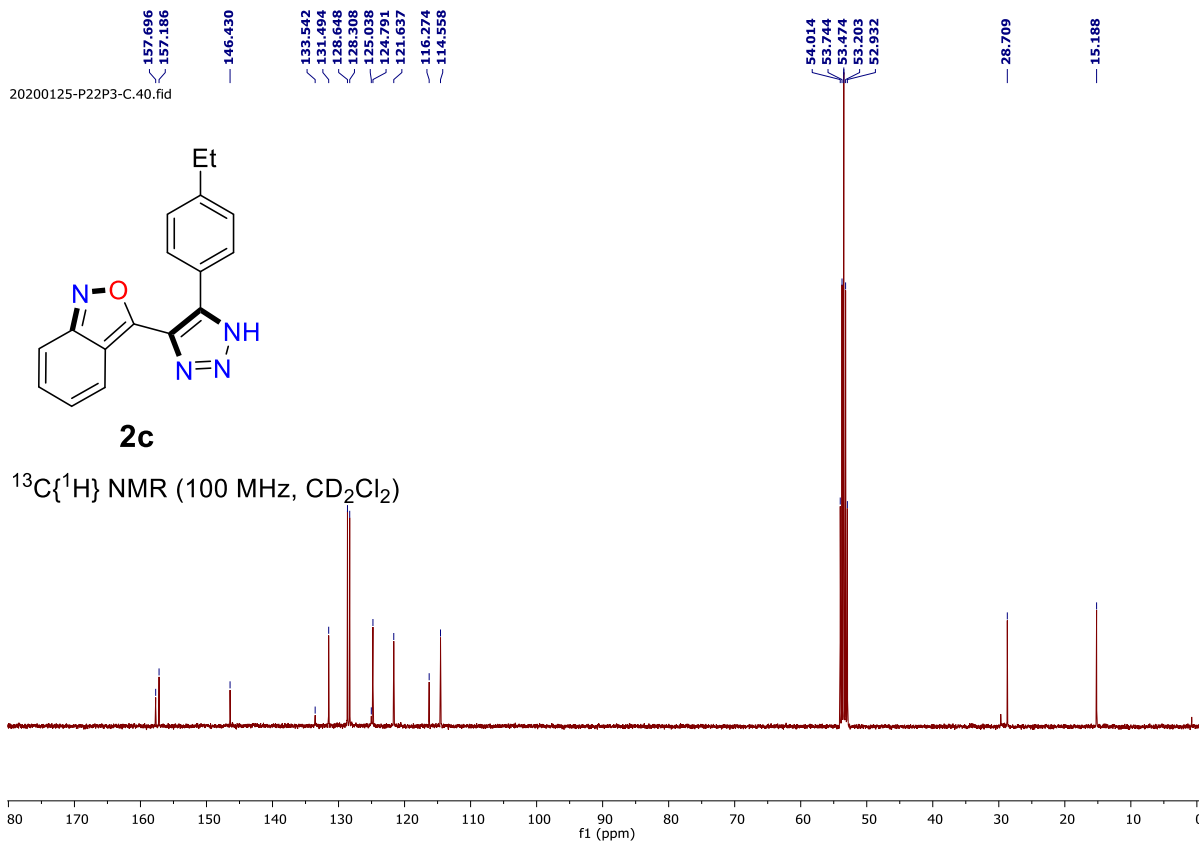



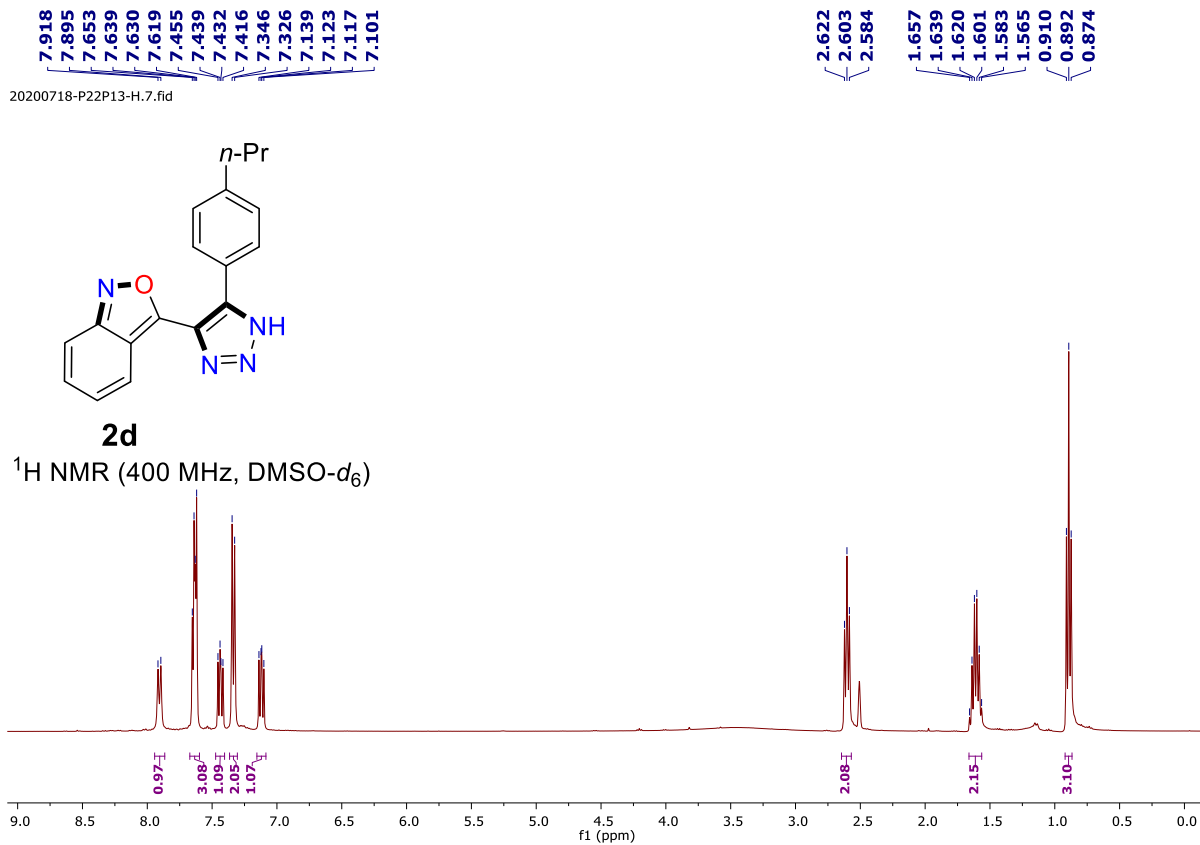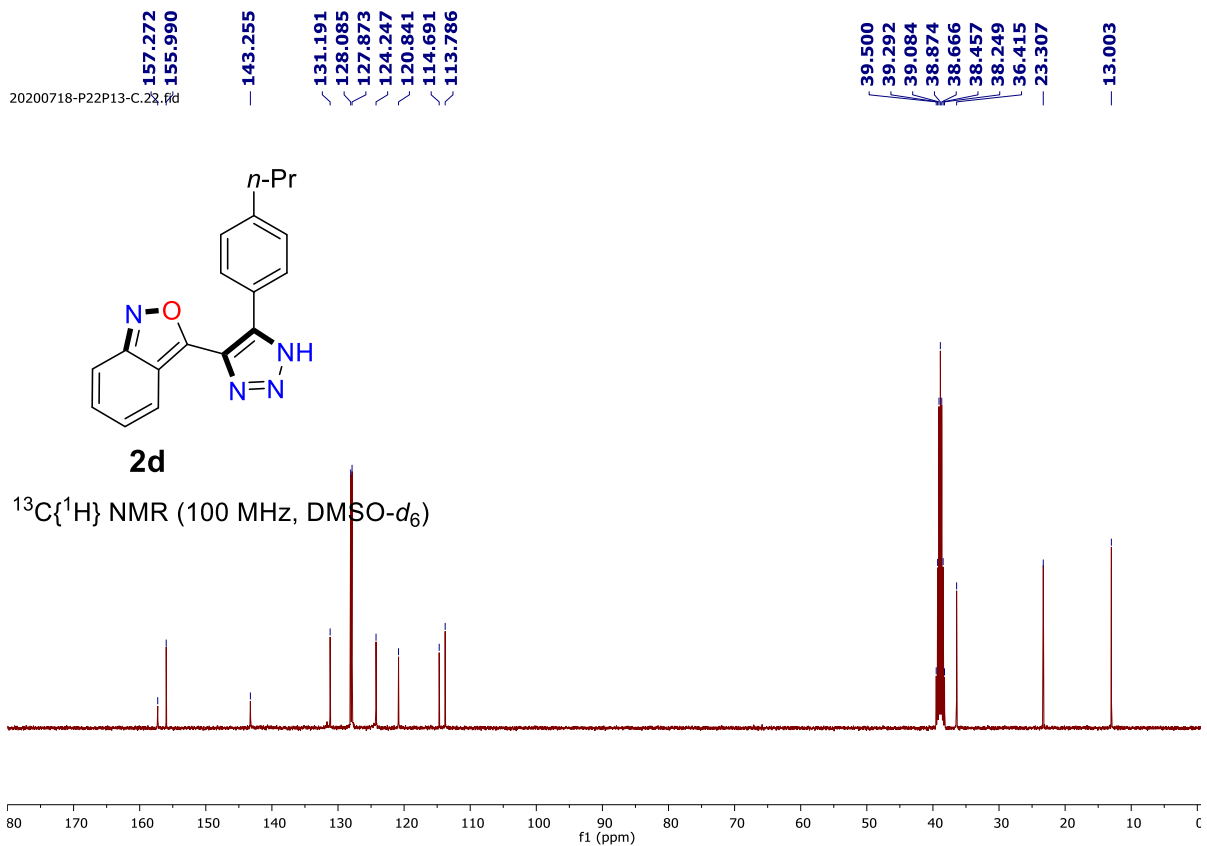

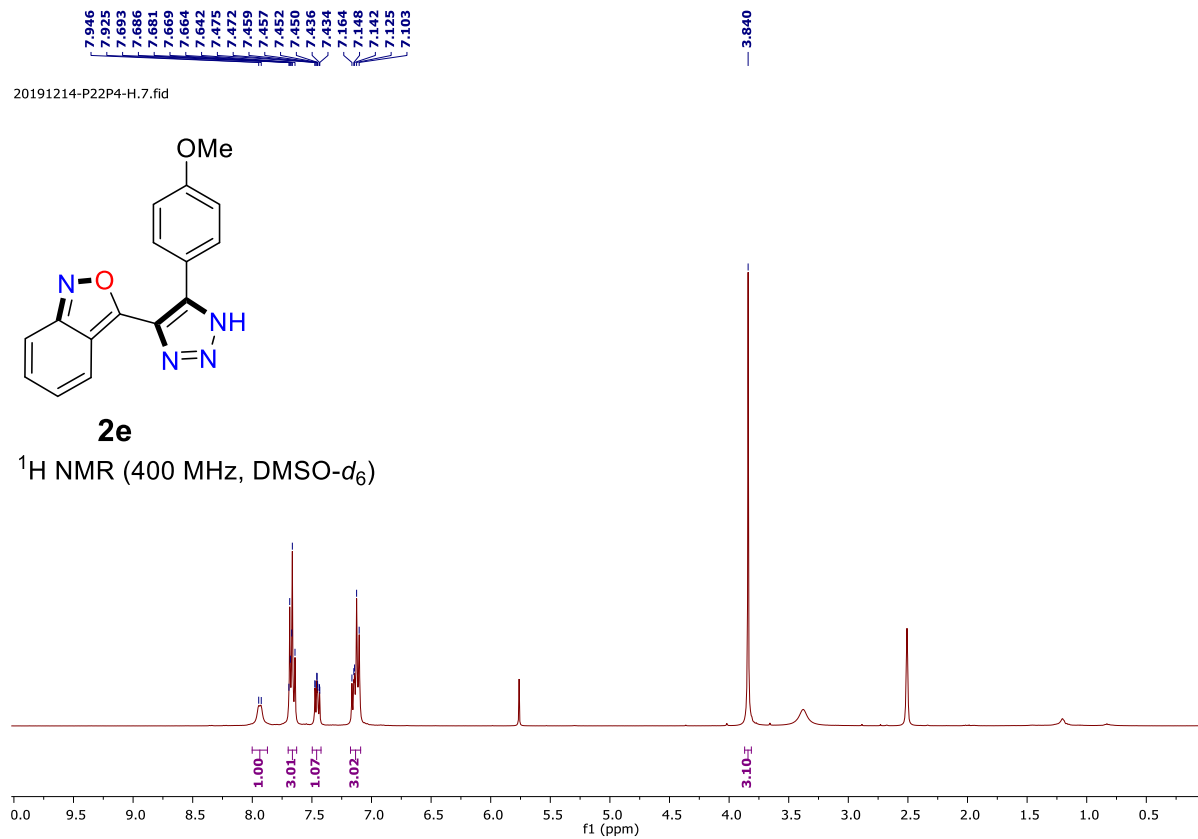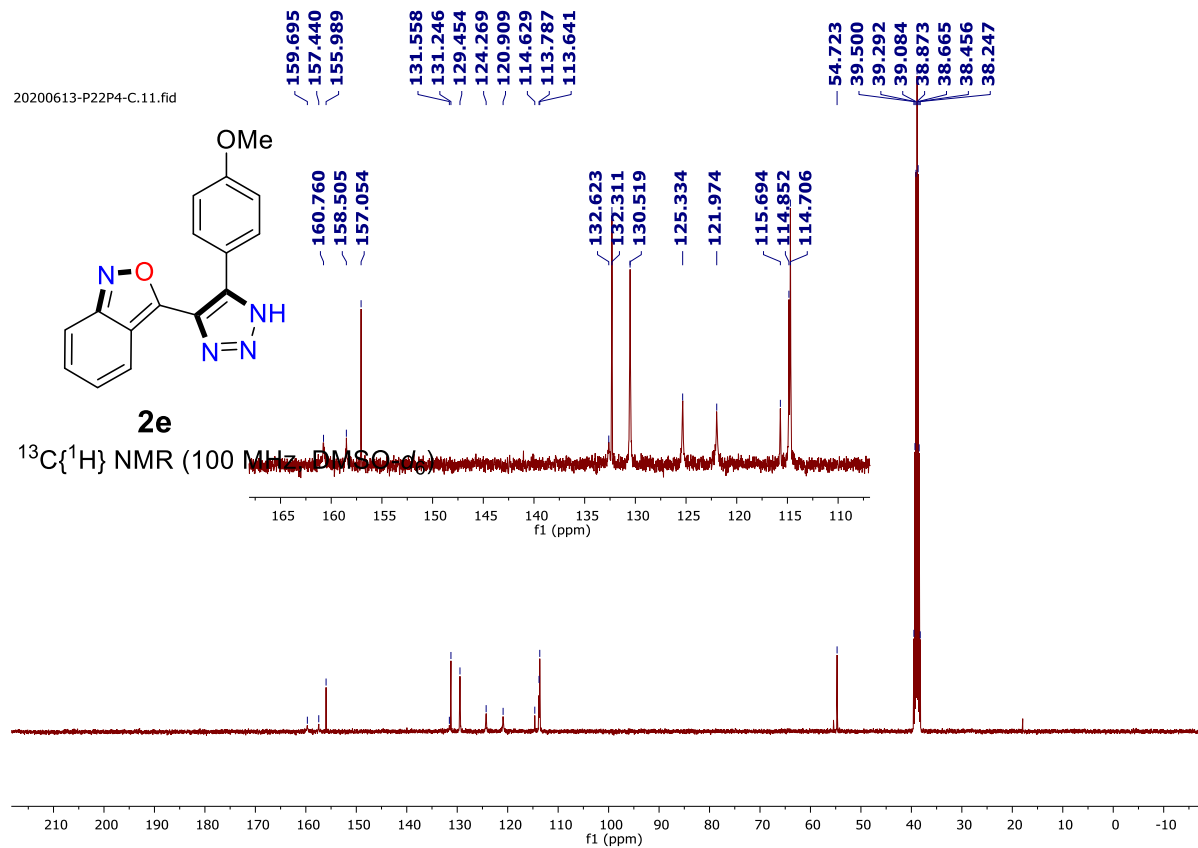

7.932  
7.911  
7.742  
7.723  
7.704  
7.662  
7.639  
7.623  
7.606  
7.480  
7.464  
7.457  
7.440  
7.418  
7.397  
7.187  
7.171  
7.165  
7.149

20200718-P22P24-H.18.fid

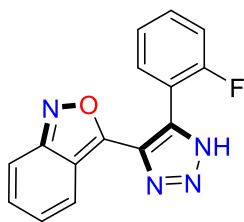

**2f**

$^1\text{H}$  NMR (400 MHz,  $\text{DMSO-}d_6$ )

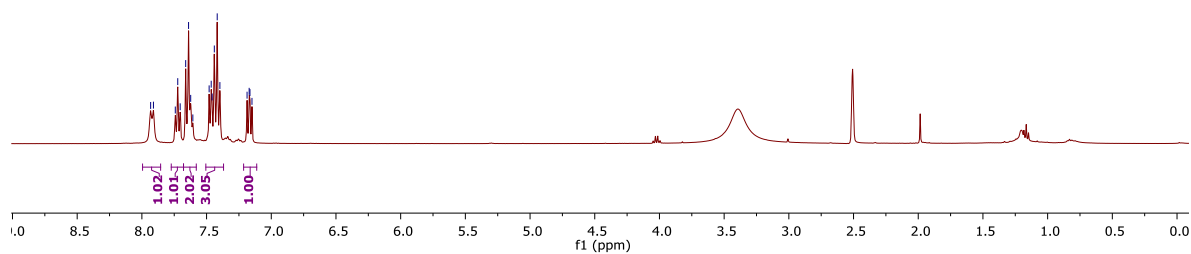

160.156  
157.690  
156.795  
155.891

20200718-P22P24-C.35.fid

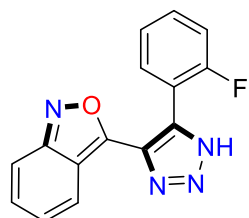

**2f**

$^{13}\text{C}\{^1\text{H}\}$  NMR (100 MHz,  $\text{DMSO-}d_6$ )

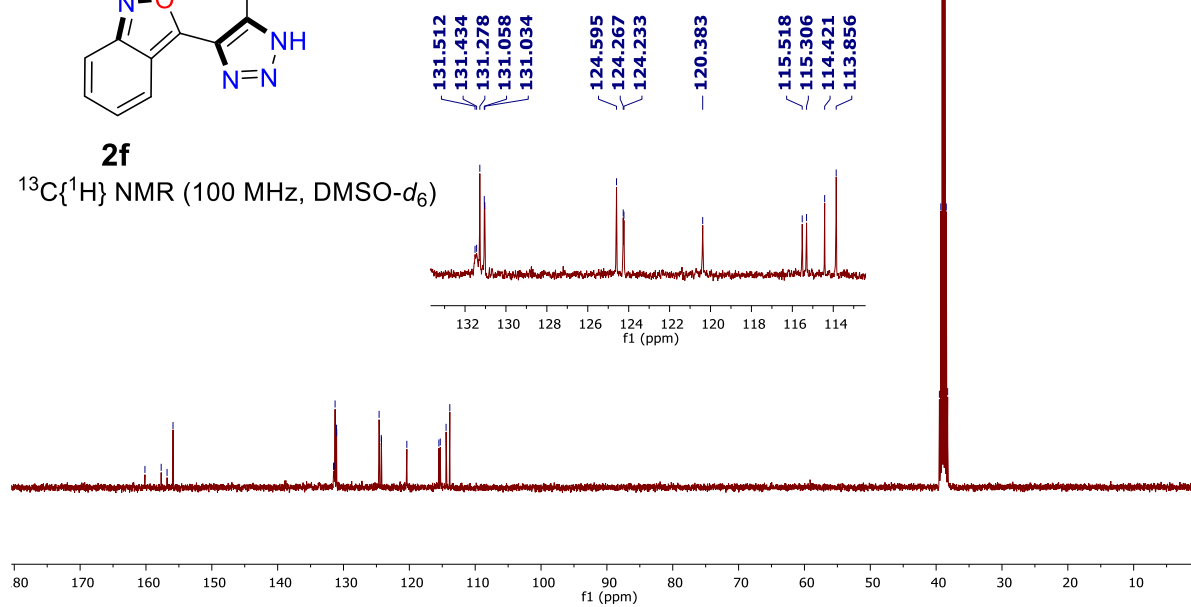

7.905  
7.883  
7.692  
7.672  
7.644  
7.634  
7.620  
7.613  
7.596  
7.568  
7.550  
7.531  
7.472  
7.455  
7.449  
7.433  
7.177  
7.161  
7.155  
7.139

20200718-P22P22-H.16.fid

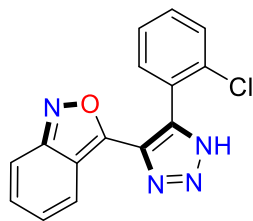

**2g**

$^1\text{H}$  NMR (400 MHz, DMSO- $d_6$ )

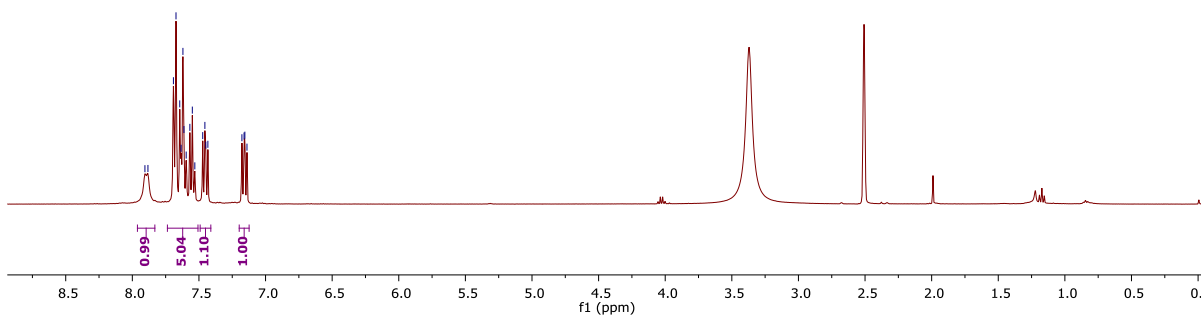

155.863  
132.442  
131.692  
131.266  
130.930  
129.131  
126.884  
124.584  
120.319  
114.240  
113.833

20200718-P22P22-C.33.fid

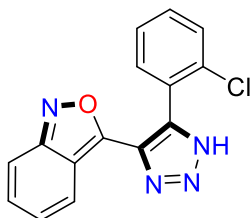

**2g**

$^{13}\text{C}\{^1\text{H}\}$  NMR (100 MHz, DMSO- $d_6$ )

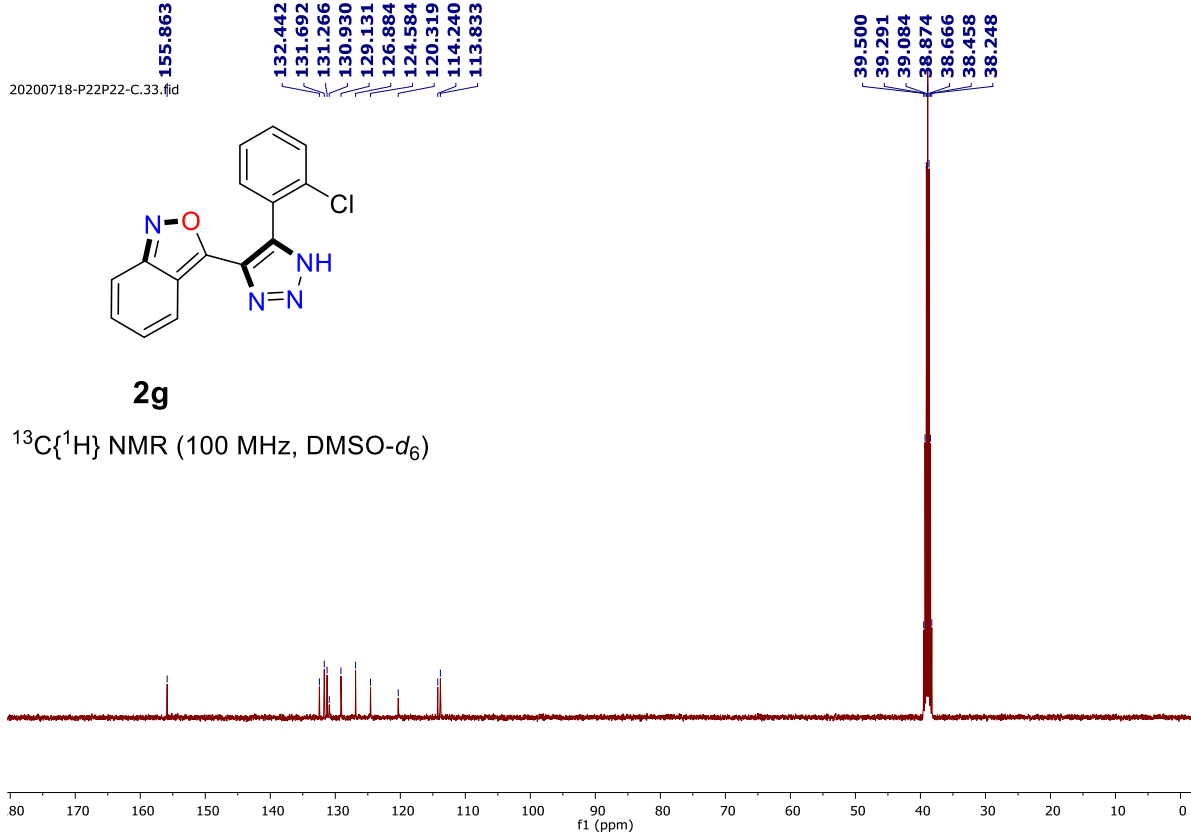

7.921  
7.898  
7.678  
7.656  
7.612  
7.605  
7.585  
7.576  
7.565  
7.481  
7.465  
7.458  
7.443  
7.405  
7.399  
7.382  
7.375  
7.369  
7.360  
7.181  
7.164  
7.158  
7.143

20200718-P22P25-H.19.fid

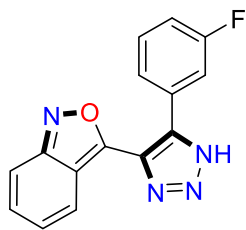

**2h**

$^1\text{H}$  NMR (400 MHz,  $\text{DMSO-}d_6$ )

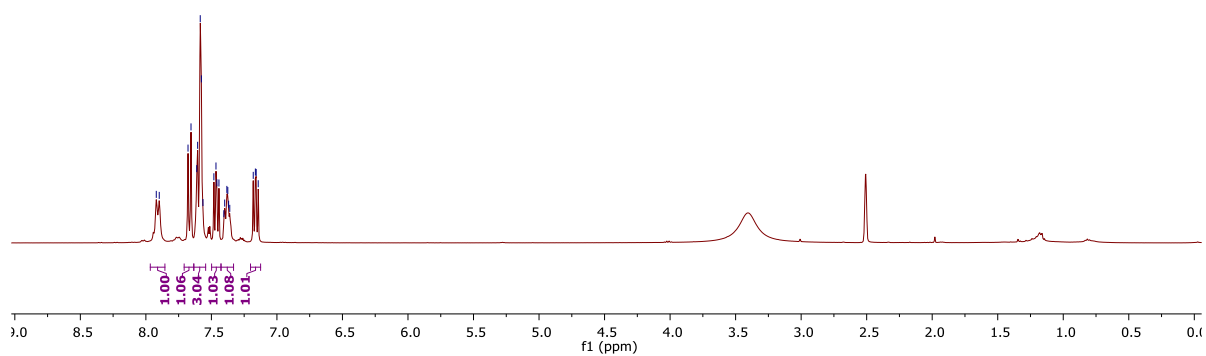

162.62  
160.20  
156.78  
156.02  
131.30  
130.28  
130.20  
124.57  
124.24  
124.22  
120.66  
115.84  
115.63  
114.98  
114.84  
114.76  
113.88  
39.50  
39.29  
39.08  
38.88  
38.67  
38.46  
38.25

20200718-P22P25-C.39.fid

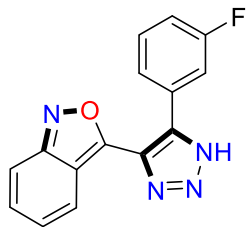

**2h**

$^{13}\text{C}\{^1\text{H}\}$  NMR (100 MHz,  $\text{DMSO-}d_6$ )

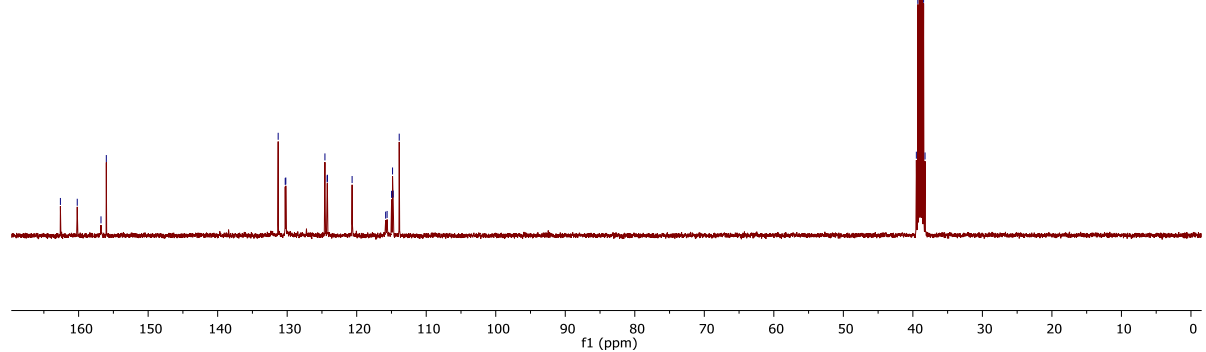

7.935  
7.912  
7.818  
7.711  
7.707  
7.694  
7.691  
7.684  
7.661  
7.616  
7.594  
7.575  
7.555  
7.490  
7.475  
7.469  
7.452  
7.192  
7.177  
7.171  
7.154

20200718-P22P23-H.17.fid

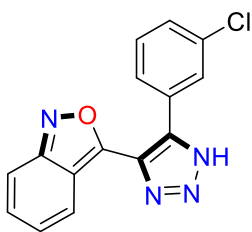

**2i**

$^1\text{H}$  NMR (400 MHz,  $\text{DMSO-}d_6$ )

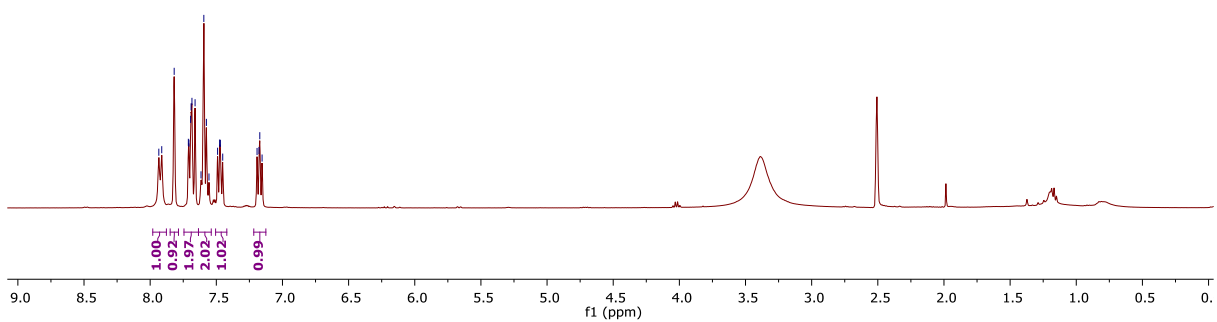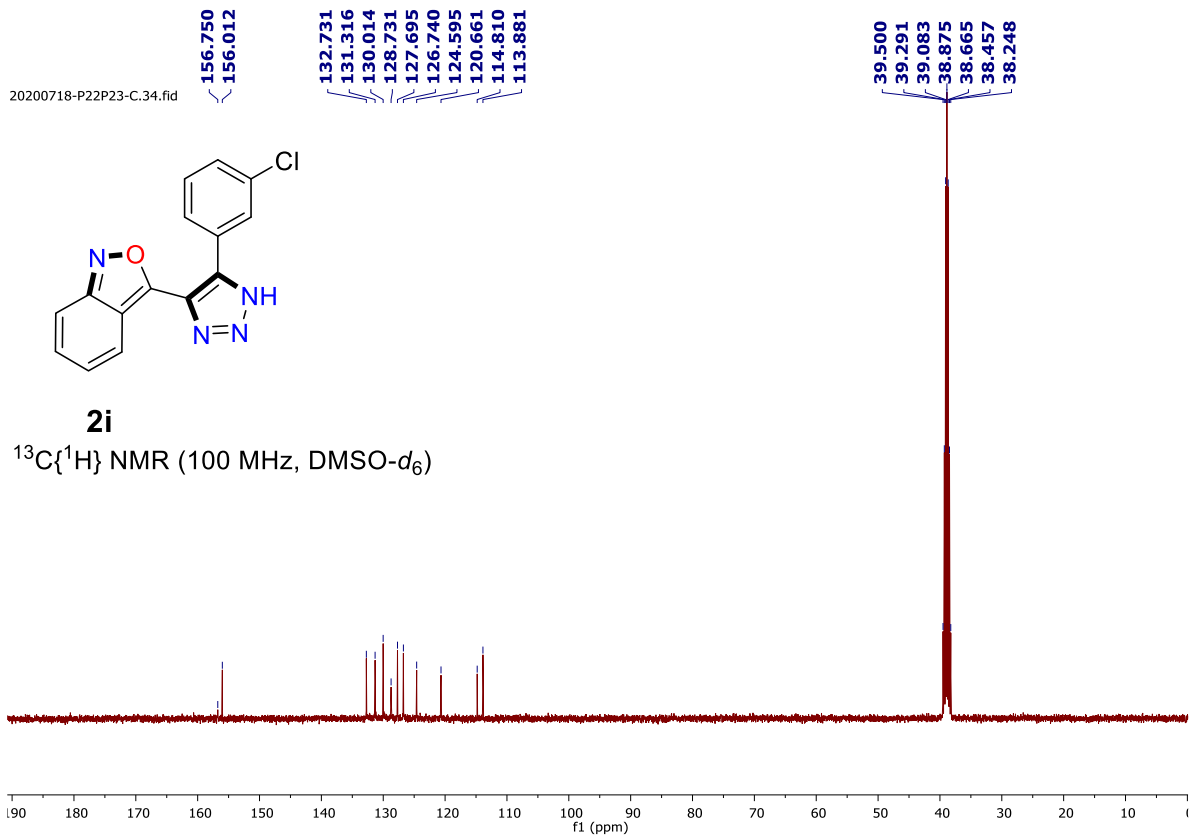

20200609-P22P6-H.10.fid

7.918  
7.897  
7.807  
7.802  
7.793  
7.785  
7.776  
7.772  
7.656  
7.633  
7.461  
7.445  
7.438  
7.422  
7.412  
7.406  
7.390  
7.367  
7.159  
7.143  
7.137  
7.121

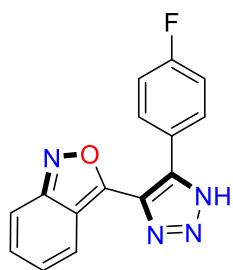

**2j**

$^1\text{H}$  NMR (400 MHz,  $\text{DMSO}-d_6$ )

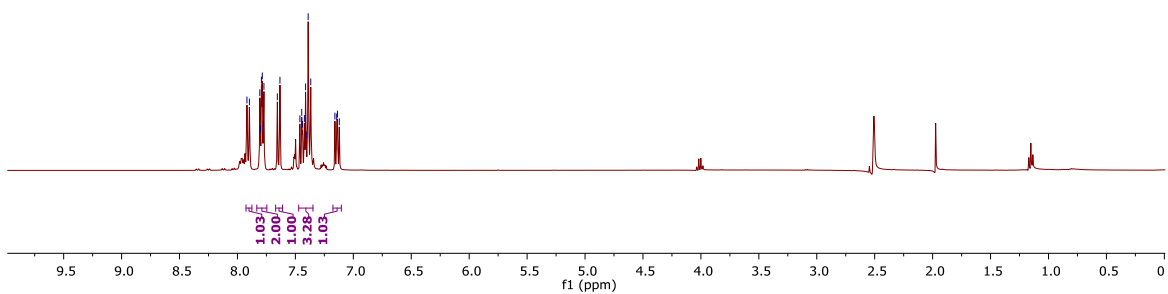

20200613-P22P6-C.13.fid

163.39  
160.93  
157.00  
155.98  
131.23  
130.41  
130.33  
124.41  
120.73  
115.27  
115.05  
114.98  
114.76  
114.71  
113.82  
39.50  
39.29  
39.08  
38.88  
38.67  
38.46  
38.25

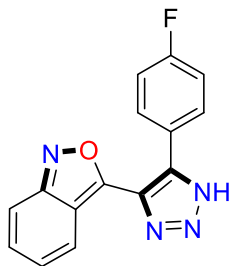

**2j**

$^{13}\text{C}\{^1\text{H}\}$  NMR (100 MHz,  $\text{DMSO}-d_6$ )

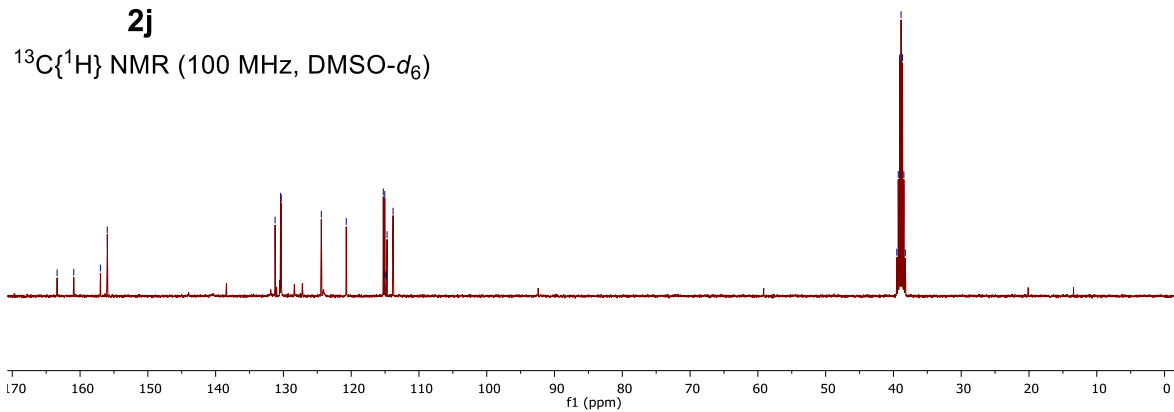

7.941  
7.923  
7.901  
7.768  
7.763  
7.752  
7.747  
7.740  
7.670  
7.648  
7.623  
7.617  
7.607  
7.602  
7.582  
7.474  
7.459  
7.451  
7.436  
7.175  
7.159  
7.153  
7.138

20200609-P22P7-H.9.fid

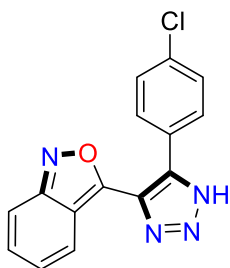

**2k**

$^1\text{H}$  NMR (400 MHz,  $\text{DMSO-}d_6$ )

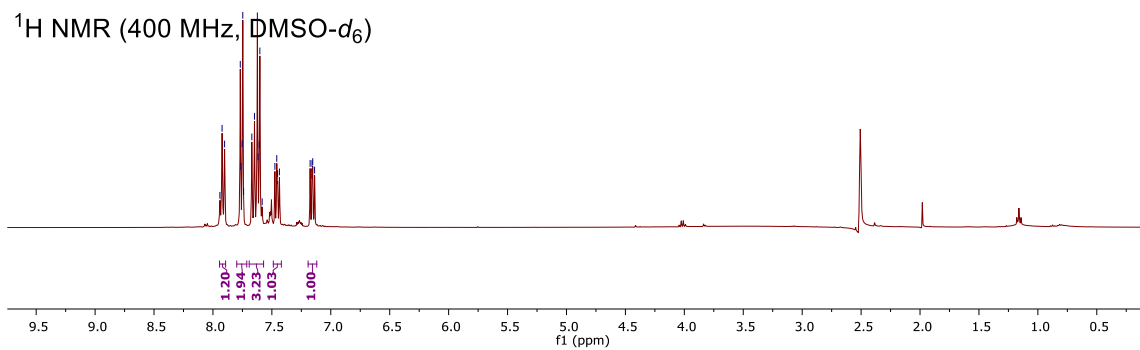

156.851  
155.993  
20200613-P22P7-C.14.fid

133.670  
131.270  
129.785  
128.190  
124.516  
120.673  
114.776  
113.852

39.500  
39.292  
39.133  
39.082  
38.873  
38.665  
38.456  
38.247

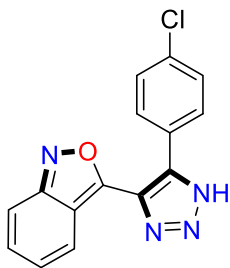

**2k**

$^{13}\text{C}\{^1\text{H}\}$  NMR (100 MHz,  $\text{DMSO-}d_6$ )

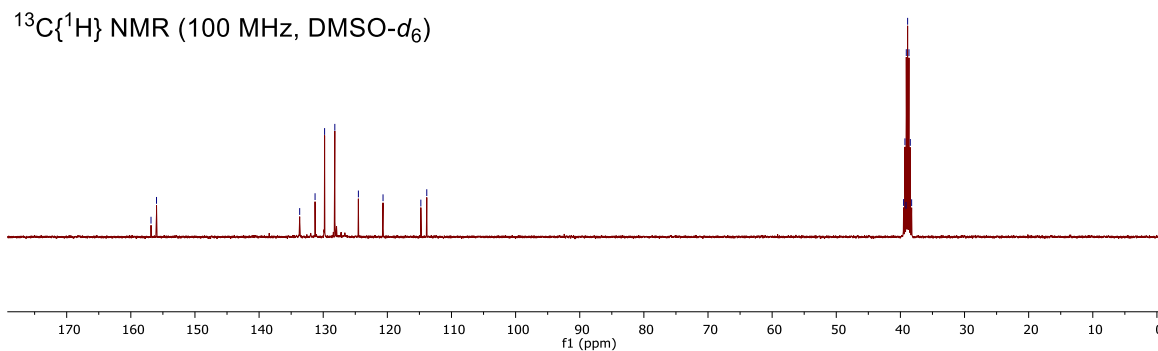



7.927  
7.906  
7.778  
7.772  
7.767  
7.756  
7.750  
7.745  
7.703  
7.697  
7.682  
7.676  
7.670  
7.660  
7.490  
7.488  
7.474  
7.472  
7.467  
7.465  
7.451  
7.449  
7.191  
7.175  
7.169  
7.153

2020-0724-P22P28-H.188.fid

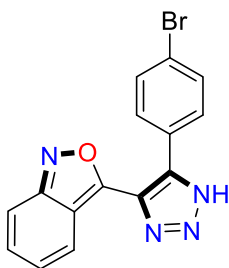

**21**

$^1\text{H}$  NMR (400 MHz,  $\text{DMSO-}d_6$ )

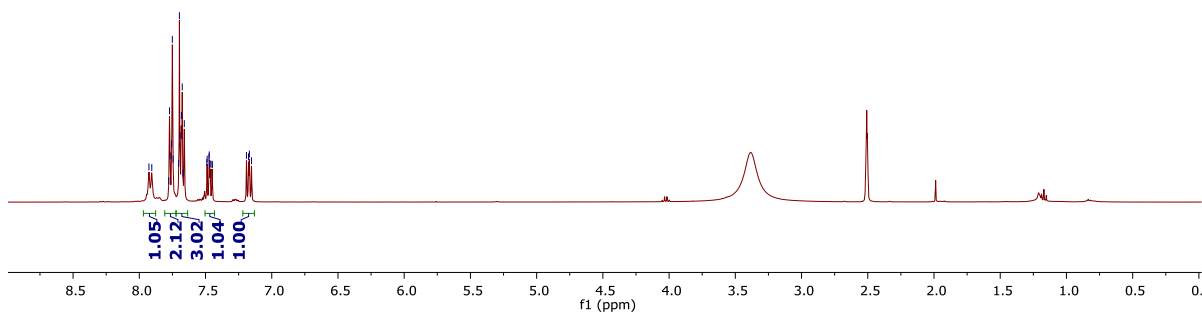

156.840  
156.003  
131.314  
131.133  
130.869  
130.029  
127.221  
124.572  
122.375  
120.653  
114.784  
113.872  
39.500  
39.292  
39.084  
38.874  
38.665  
38.457  
38.249

2020-0724-P22P28-C.196.fid

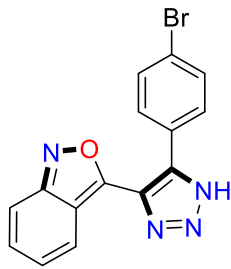

**21**

$^{13}\text{C}\{^1\text{H}\}$  NMR (100 MHz,  $\text{DMSO-}d_6$ )

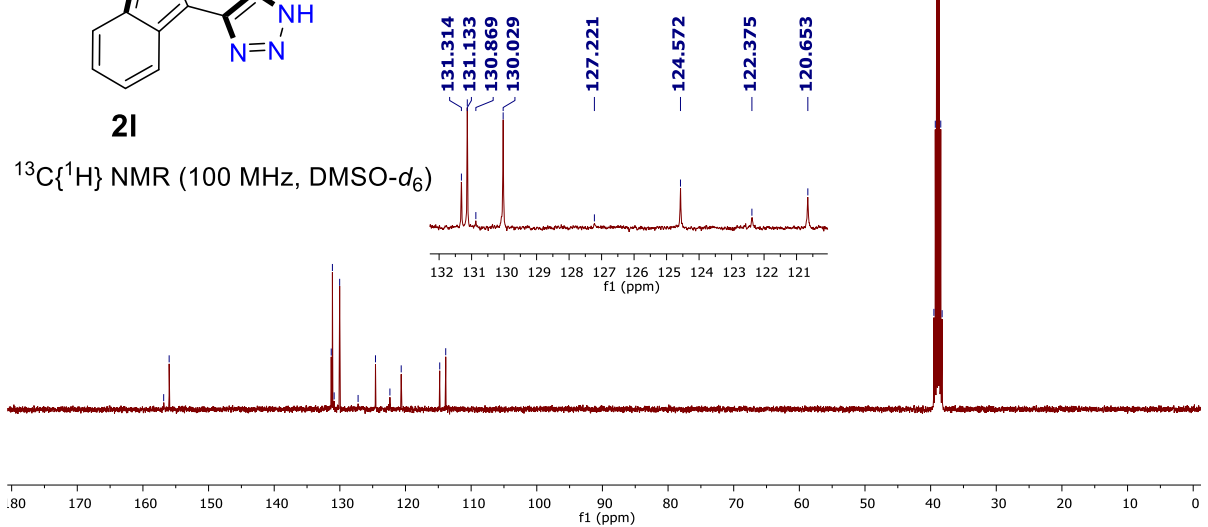

8.619  
8.390  
8.368  
8.342  
8.227  
8.207  
7.965  
7.943  
7.925  
7.875  
7.855  
7.834  
7.701  
7.679  
7.543  
7.522  
7.508  
7.490  
7.470  
7.217  
7.198  
7.179

2020-0724-P22P26-H.186.fid

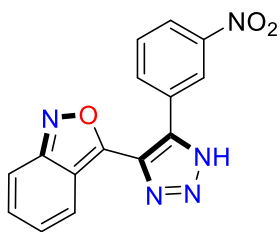

**2m**

$^1\text{H}$  NMR (400 MHz, DMSO- $d_6$ )

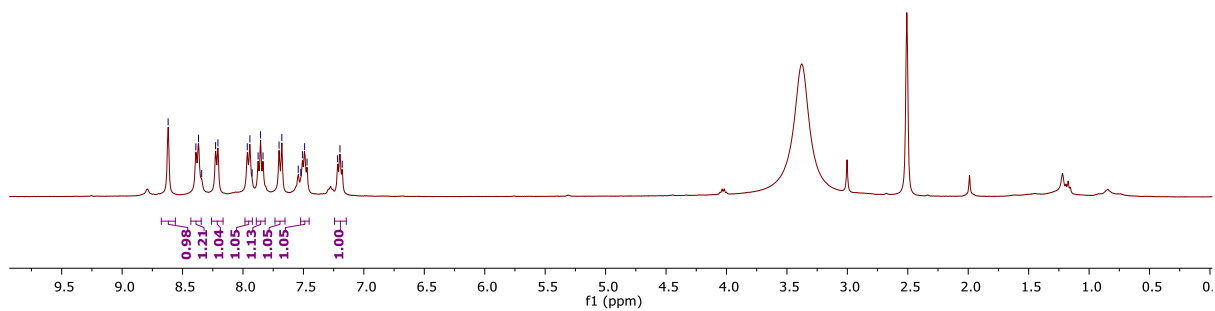

156.049  
147.294  
134.416  
131.402  
129.801  
124.794  
123.461  
122.526  
120.605  
114.895  
113.930

2020-0724-P22P26-C.194.fid

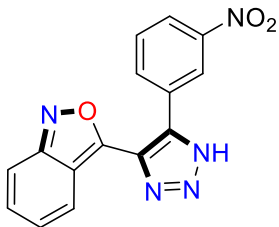

**2m**

$^{13}\text{C}\{^1\text{H}\}$  NMR (100 MHz, DMSO- $d_6$ )

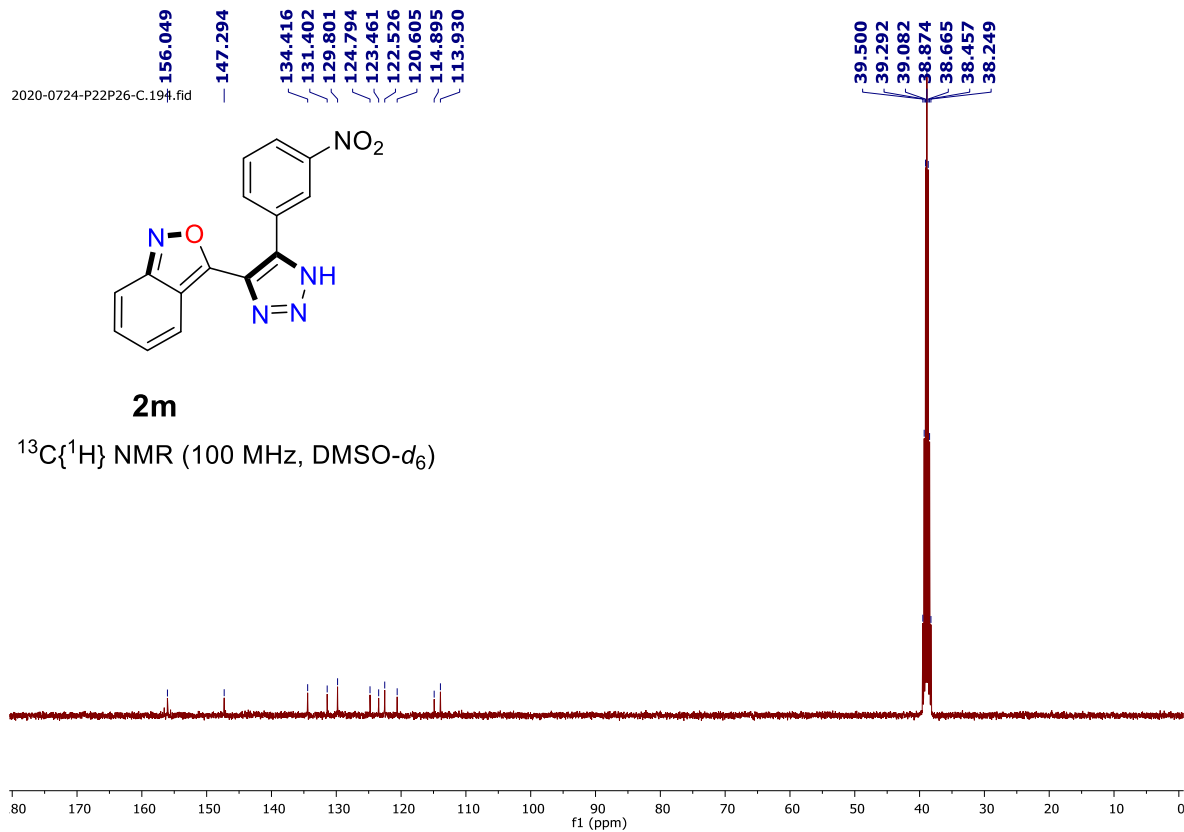

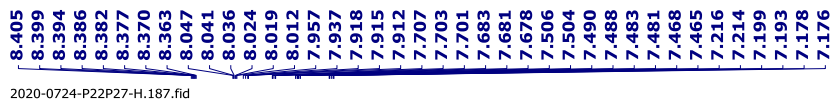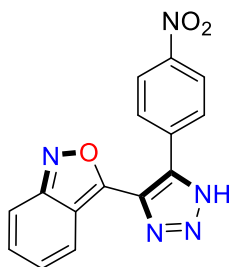

**2n**

$^1\text{H}$  NMR (400 MHz,  $\text{DMSO}-d_6$ )

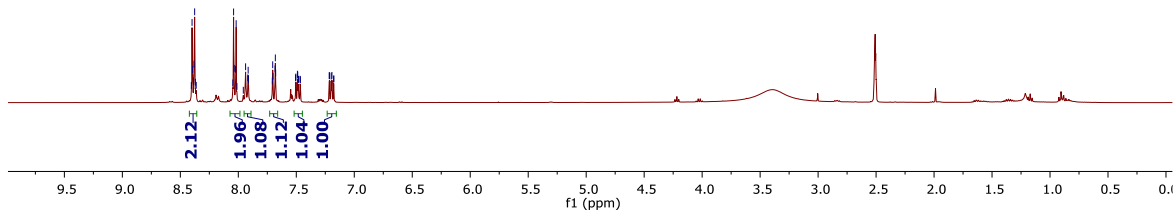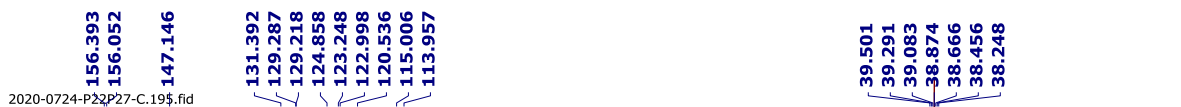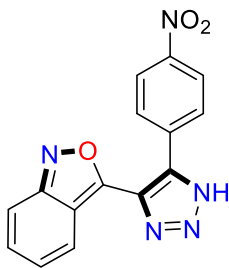

**2n**

$^{13}\text{C}\{^1\text{H}\}$  NMR (100 MHz,  $\text{DMSO}-d_6$ )

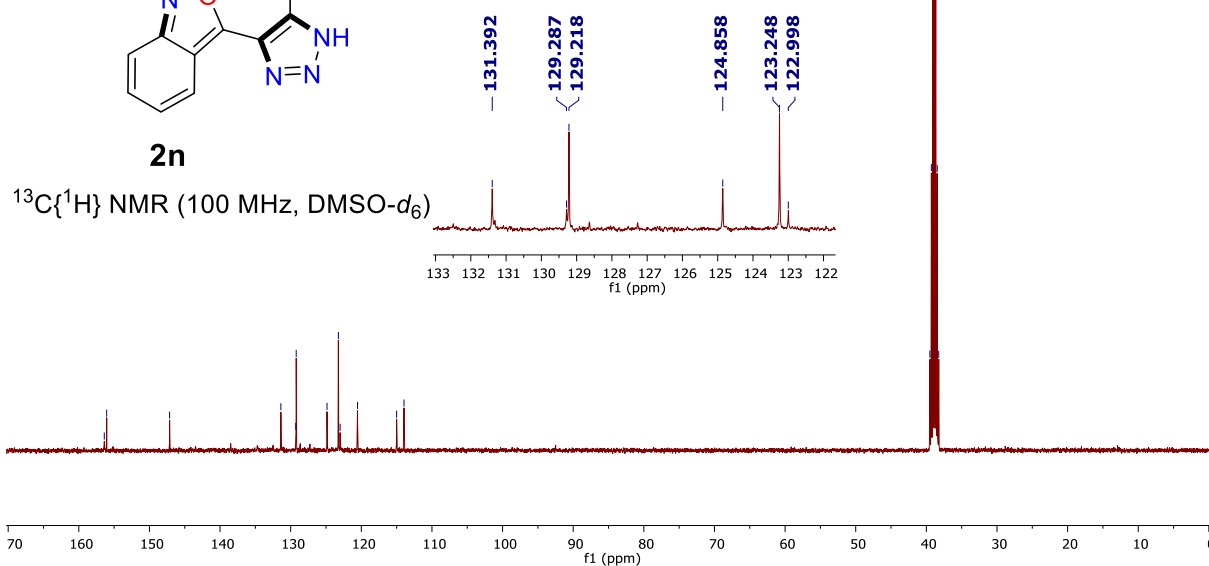

20200613-P22P12-H.21.fid

8.091  
8.069  
7.677  
7.654  
7.492  
7.490  
7.477  
7.474  
7.470  
7.467  
7.461  
7.454  
7.451  
7.186  
7.170  
7.164  
7.148

2.566  
2.554  
2.547  
2.541  
2.533  
2.522

1.191  
1.184  
1.174  
1.170  
1.164  
1.155  
1.007  
0.997  
0.992  
0.985  
0.979  
0.968

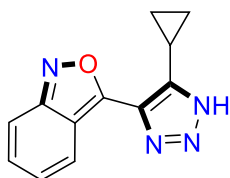

2o

$^1\text{H}$  NMR (400 MHz, DMSO- $d_6$ )

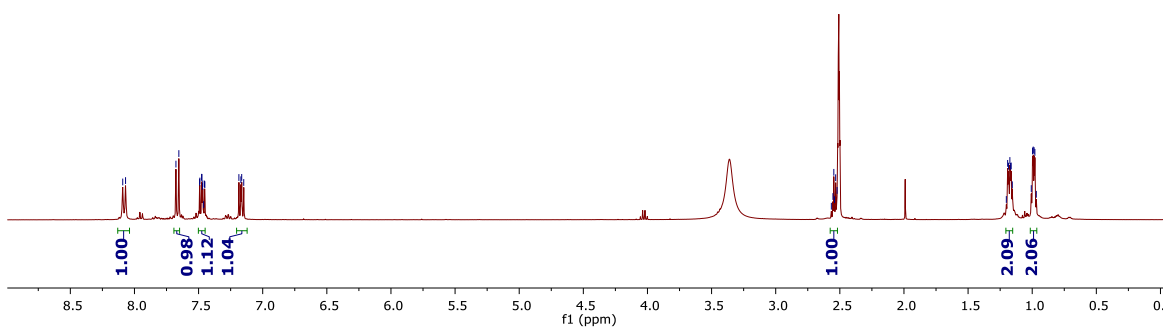

20200613-P22P12-C.22.fid

158.620  
156.546

134.080  
131.923

124.656  
121.531

114.443  
114.233

40.128  
39.918  
39.710  
39.502  
39.293  
39.083  
38.874

8.834  
5.720

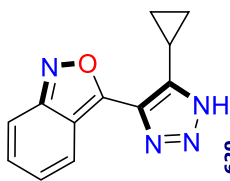

2o

$^{13}\text{C}\{^1\text{H}\}$  NMR (100 MHz, DMSO- $d_6$ )

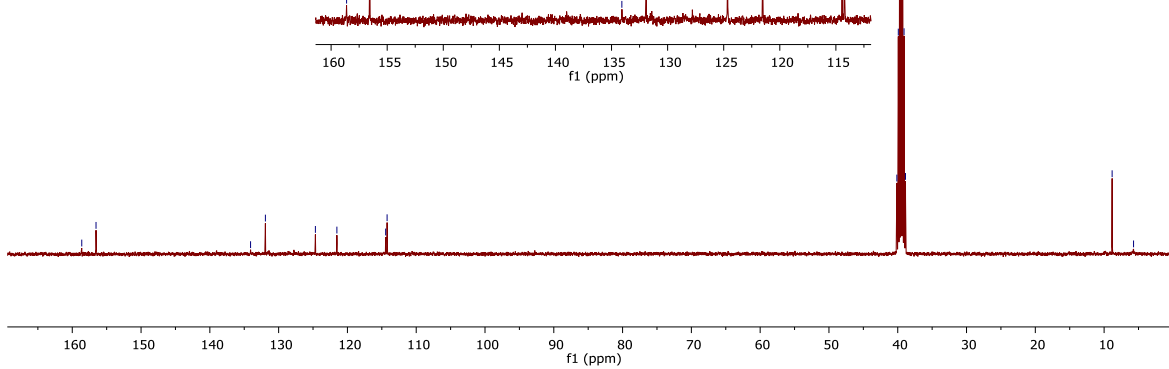

20200609-P22P5-H.11.fid

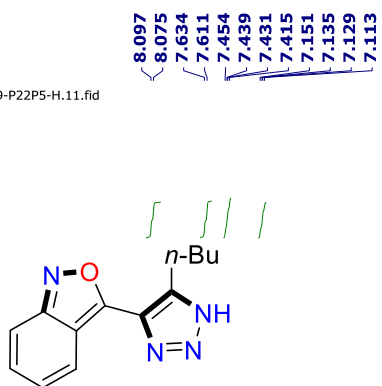

2p

$^1\text{H}$  NMR (400 MHz, DMSO- $d_6$ )

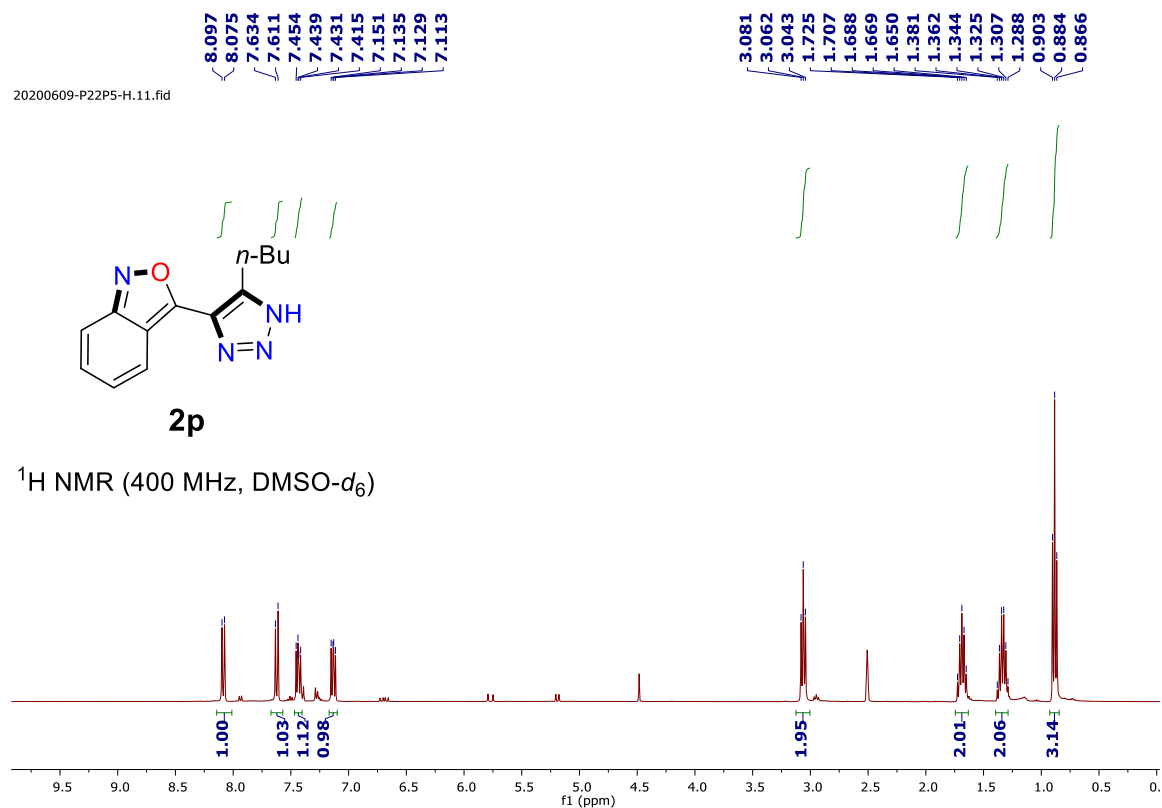

20200613-P22P5-C.12.fid

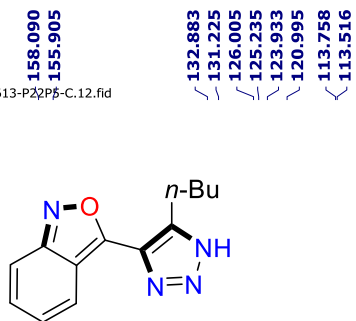

2p

$^{13}\text{C}\{^1\text{H}\}$  NMR (100 MHz, DMSO- $d_6$ )

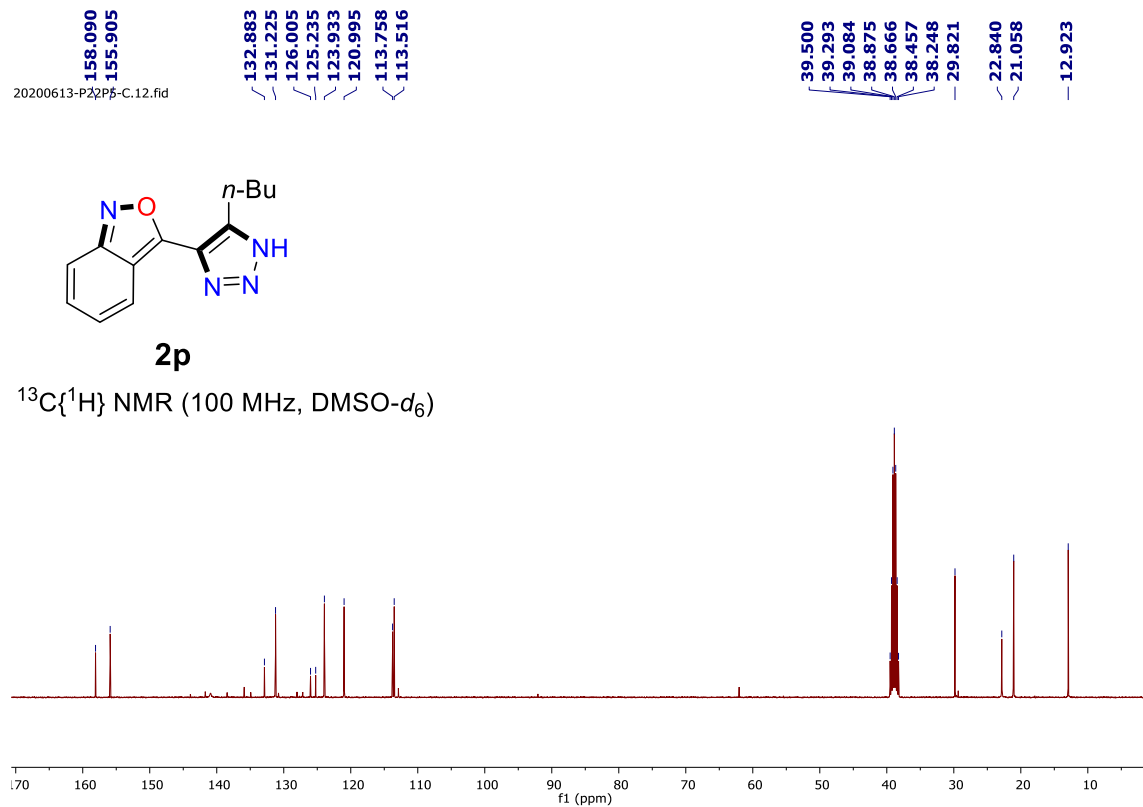

20200718-P22P17-H.11.fid

8.104  
8.082  
7.653  
7.630  
7.476  
7.460  
7.453  
7.437  
7.173  
7.157  
7.151  
7.135

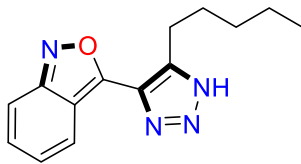

**2q**

$^1\text{H}$  NMR (400 MHz, DMSO- $d_6$ )

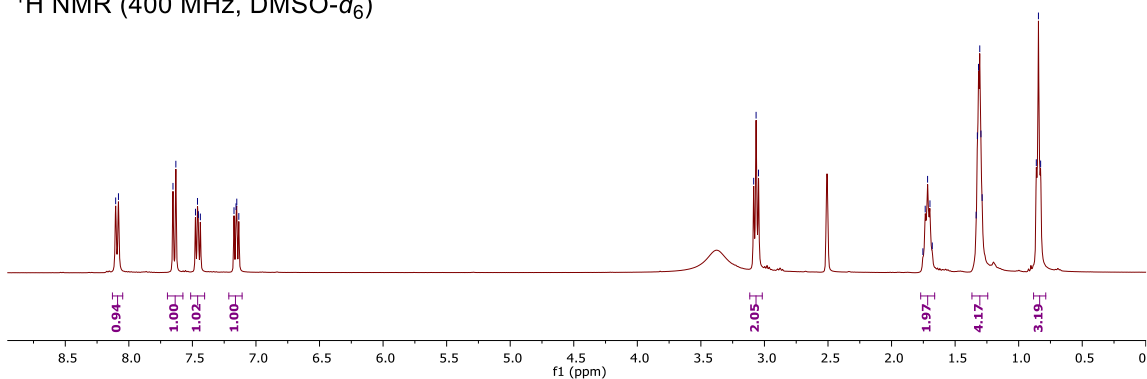

20200718-P22P17-C.28.fid

158.053  
155.906  
132.887  
131.279  
124.003  
120.969  
113.753  
113.540  
39.501  
39.291  
39.083  
38.874  
38.666  
38.456  
38.248  
30.062  
27.346  
23.045  
21.076  
13.148

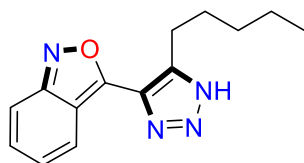

**2q**

$^{13}\text{C}\{^1\text{H}\}$  NMR (100 MHz, DMSO- $d_6$ )

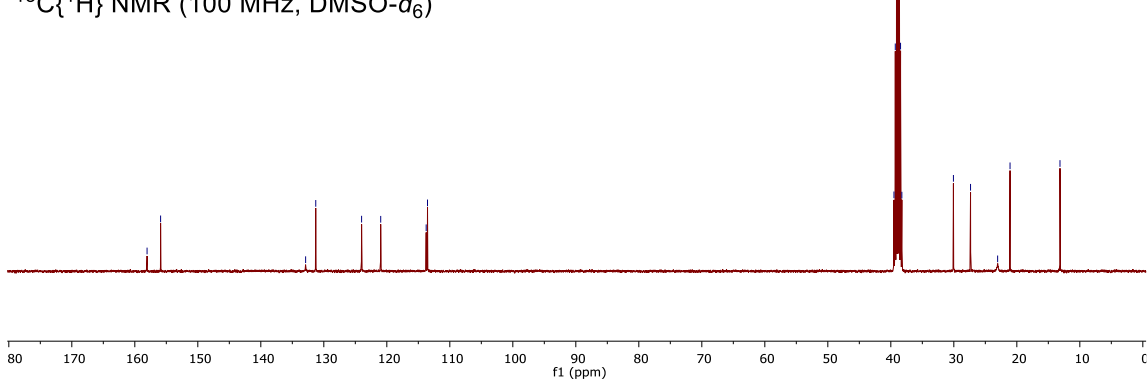

8.125  
8.118  
7.981  
7.959  
7.780  
7.770  
7.760  
7.685  
7.663  
7.567  
7.555  
7.488  
7.472  
7.466  
7.450  
7.184  
7.168  
7.162  
7.146

20200729-P22P14-H.4.fid

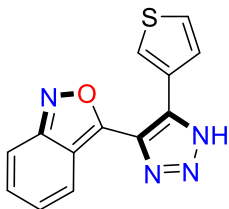

**2r**

$^1\text{H}$  NMR (400 MHz, DMSO- $d_6$ )

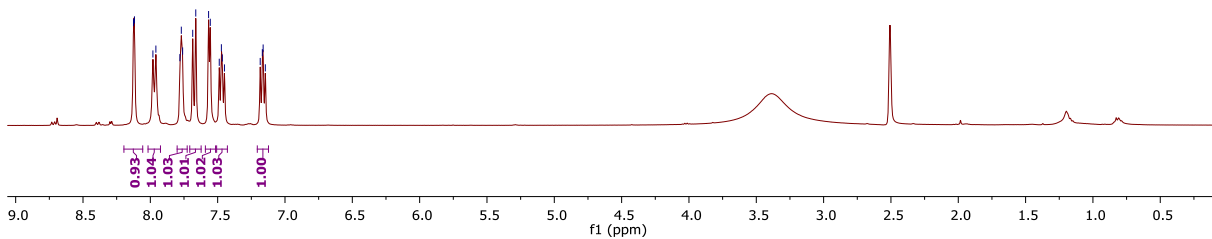

157.090  
156.005  
131.260  
126.962  
126.677  
125.643  
124.354  
120.859  
114.740  
113.771  
39.500  
39.292  
39.083  
38.875  
38.665  
38.456  
38.248

20200822-P22P14-C.7.fid

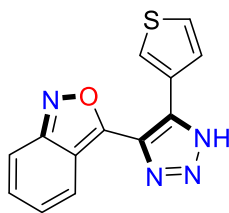

**2r**

$^{13}\text{C}\{^1\text{H}\}$  NMR (100 MHz, DMSO- $d_6$ )

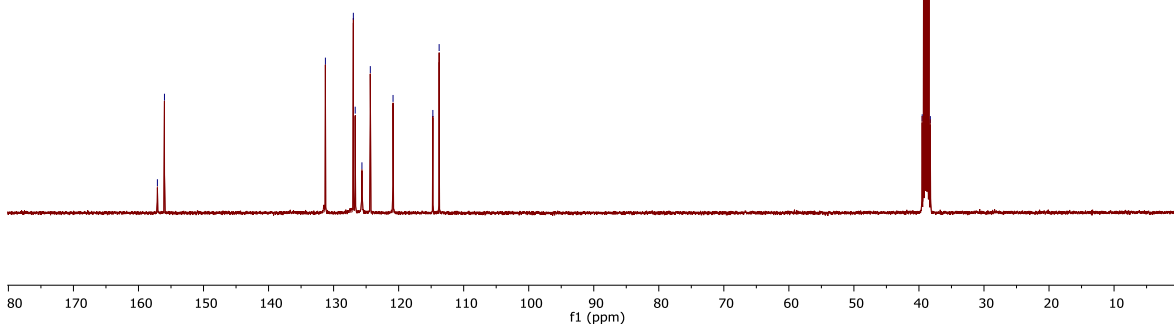

2020-0724-P22P8-H.185.fid

8.949  
8.944  
8.735  
8.731  
8.720  
8.188  
8.183  
8.178  
8.168  
8.163  
8.158  
7.978  
7.956  
7.946  
7.926  
7.692  
7.679  
7.669  
7.622  
7.610  
7.602  
7.590  
7.581  
7.500  
7.484  
7.477  
7.461  
7.209  
7.193  
7.187  
7.171

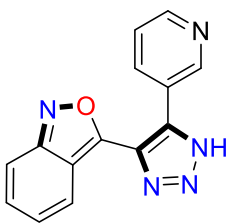

**2s**

$^1\text{H}$  NMR (400 MHz,  $\text{DMSO-}d_6$ )

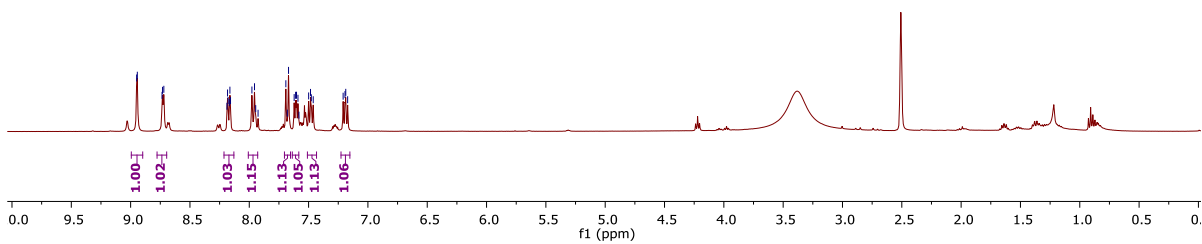

2020-0724-P22P8-C.193.fid

156.721  
156.017  
149.663  
148.434  
138.432  
135.652  
135.553  
131.367  
128.461  
127.237  
124.679  
123.095  
120.649  
114.720  
113.898

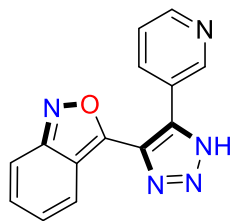

**2s**

$^{13}\text{C}\{^1\text{H}\}$  NMR (100 MHz,  $\text{DMSO-}d_6$ )

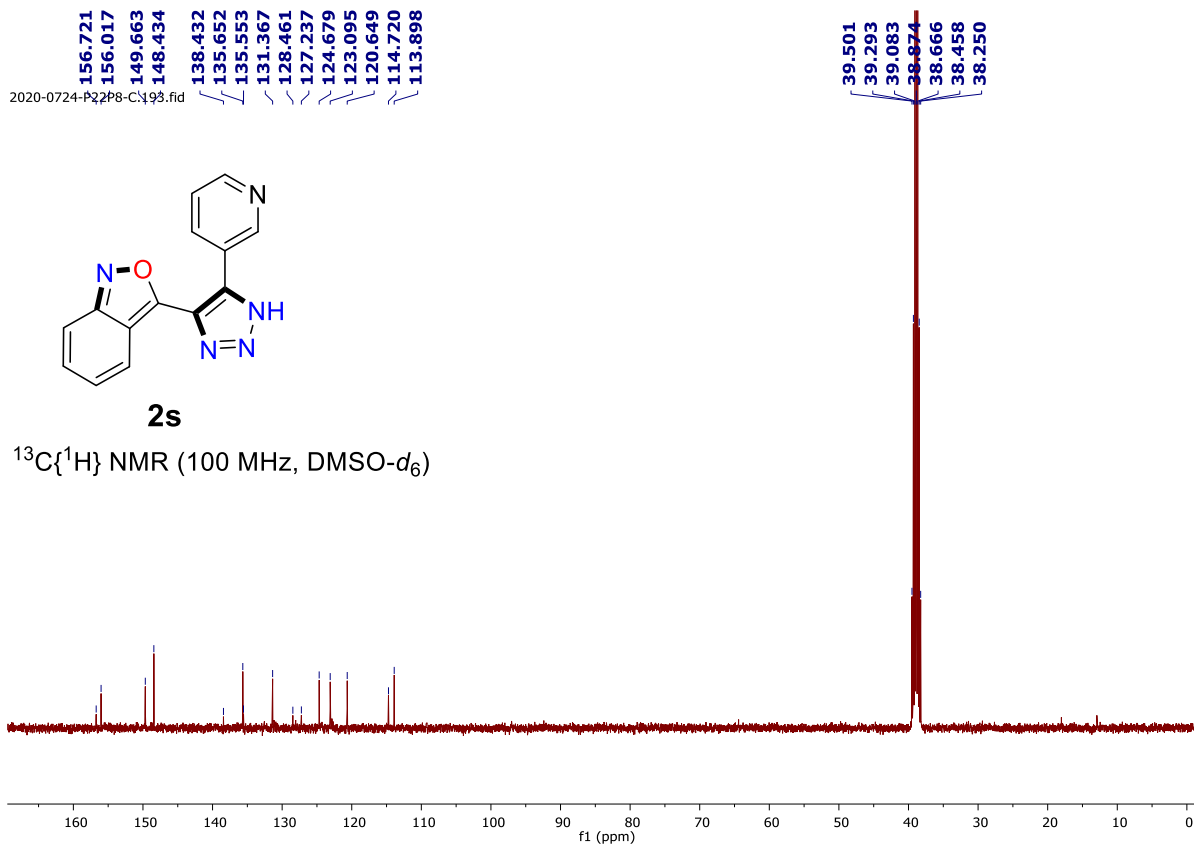



8.327  
8.089  
8.067  
8.027  
8.022  
8.005  
7.990  
7.984  
7.953  
7.932  
7.817  
7.796  
7.679  
7.656  
7.624  
7.618  
7.608  
7.599  
7.593  
7.479  
7.463  
7.456  
7.440  
7.165  
7.149  
7.143  
7.127

20200718-P22P15-H.9.fid

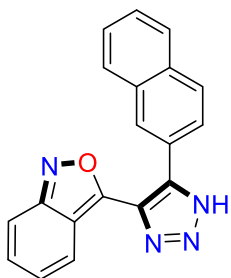

**2t**

$^1\text{H}$  NMR (400 MHz, DMSO- $d_6$ )

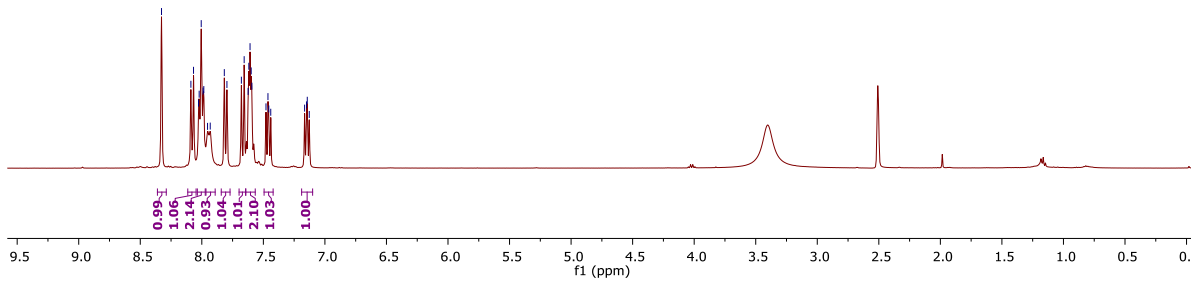

157.152  
156.019  
132.437  
131.975  
131.260  
127.694  
127.674  
127.499  
127.115  
126.571  
126.248  
125.373  
124.429  
120.761  
114.768  
113.863  
39.500  
39.292  
39.083  
38.874  
38.665  
38.457  
38.248

20200718-P22P15-C.24.fid

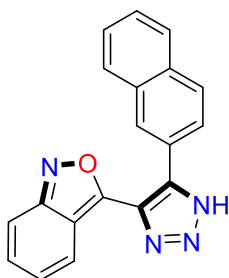

**2t**

$^{13}\text{C}\{^1\text{H}\}$  NMR (100 MHz, DMSO- $d_6$ )

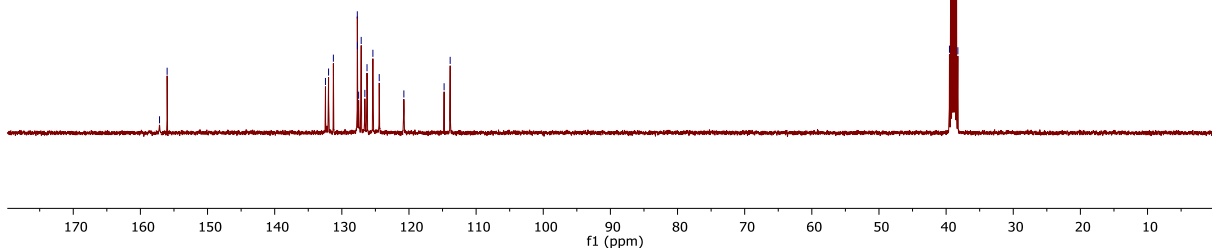

20200718-P22P16-H-10.fid

9.014  
8.993  
8.982  
8.961  
8.145  
8.087  
8.067  
8.029  
8.015  
8.005  
7.849  
7.831  
7.811  
7.778  
7.757  
7.738  
7.719  
7.620  
7.599  
7.582  
7.563  
7.540  
7.431  
7.415  
7.408  
7.393  
7.151  
7.135  
7.129  
7.113

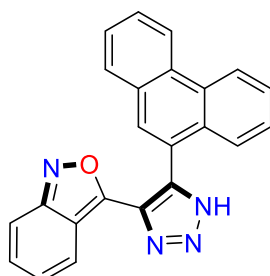

**2u**

$^1\text{H}$  NMR (400 MHz,  $\text{DMSO}-d_6$ )

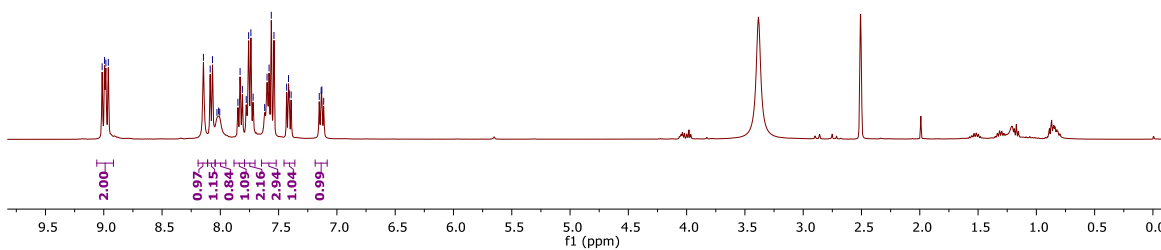

20200718-P22P17-C-27.fid

155.782  
131.225  
129.838  
129.668  
129.343  
128.450  
127.546  
126.818  
126.719  
124.936  
124.423  
122.905  
122.454  
120.617  
114.324  
113.713

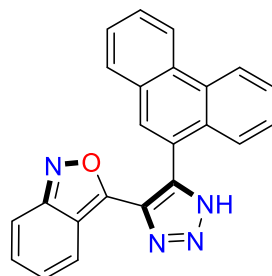

**2u**

$^{13}\text{C}\{^1\text{H}\}$  NMR (100 MHz,  $\text{DMSO}-d_6$ )

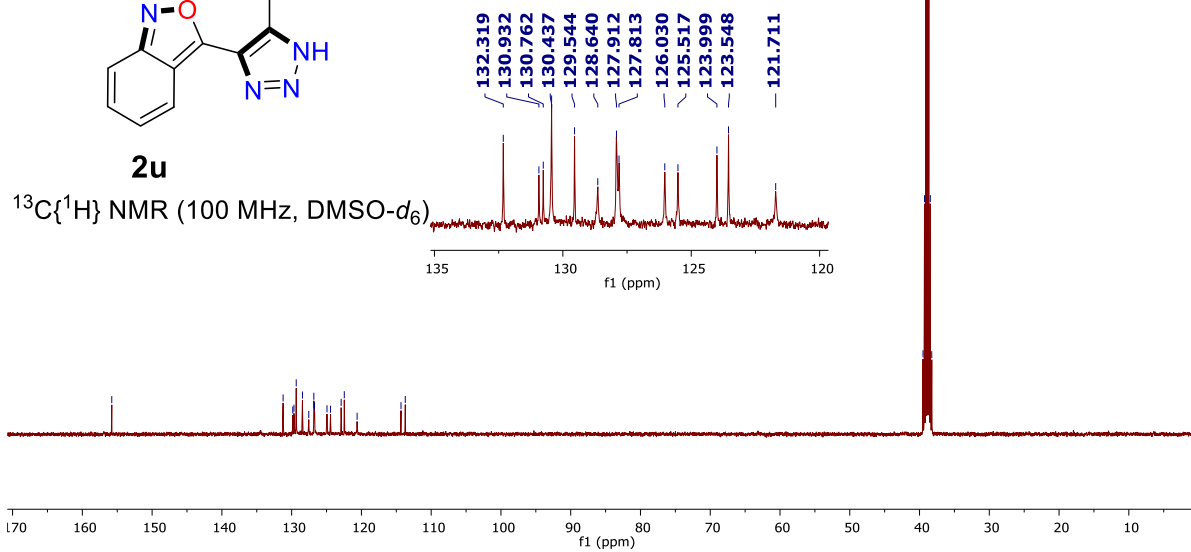

2020-0724-P22P29-H.189.fid

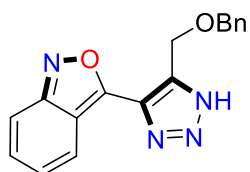

2v

$^1\text{H}$  NMR (400 MHz, DMSO- $d_6$ )

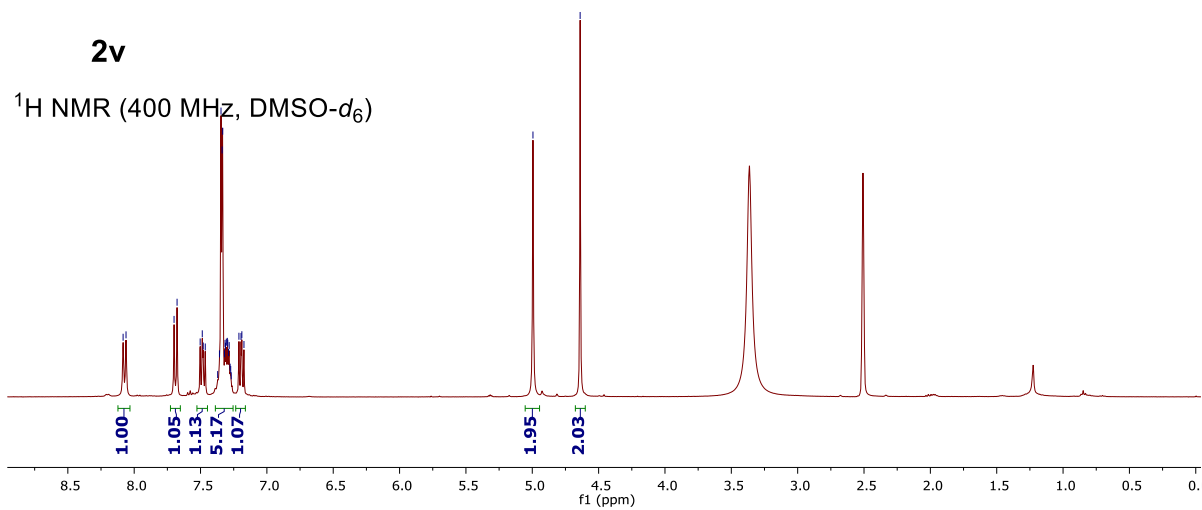

2020-0724-P22P29-C.197.fid

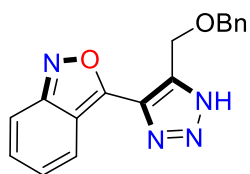

2v

$^{13}\text{C}\{^1\text{H}\}$  NMR (100 MHz, DMSO- $d_6$ )

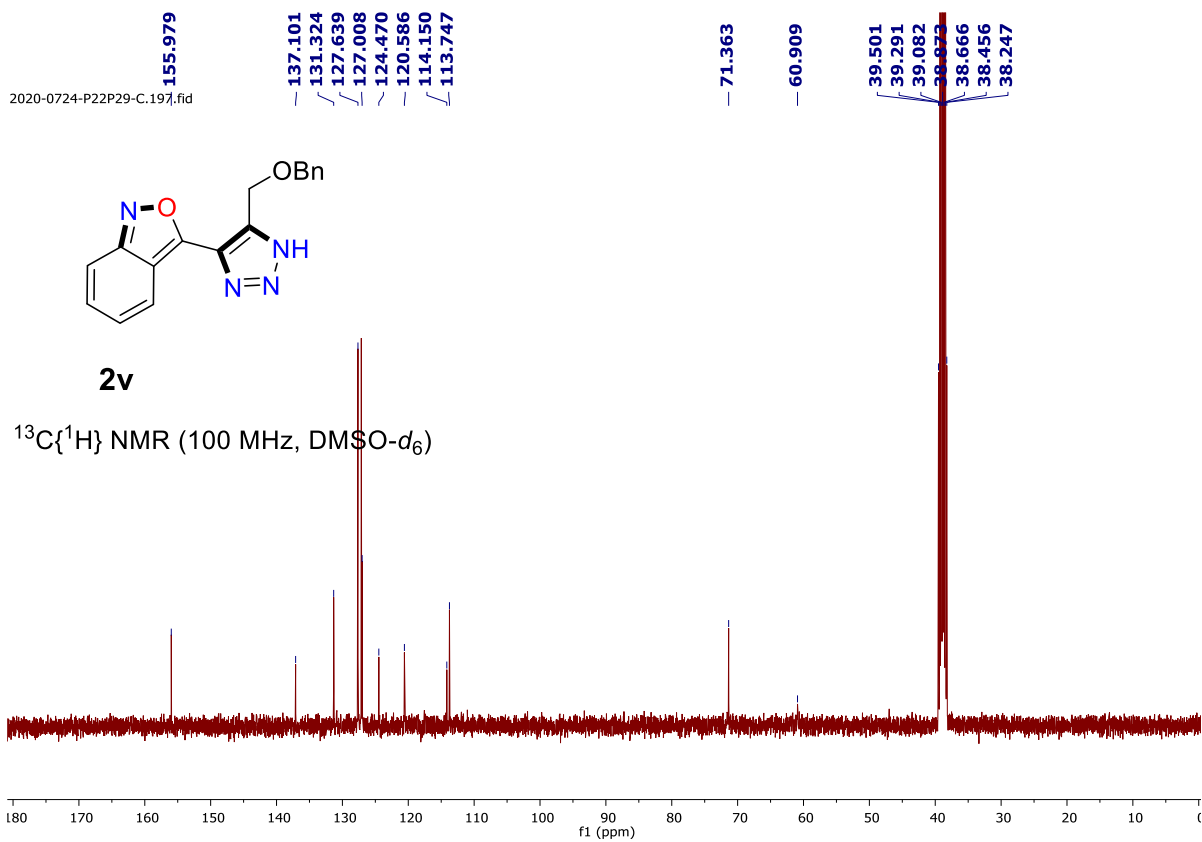

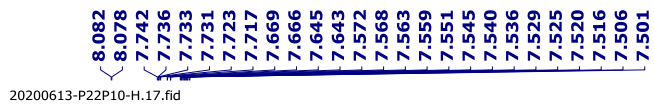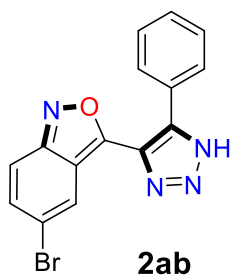

$^1\text{H}$  NMR (400 MHz,  $\text{DMSO}-d_6$ )

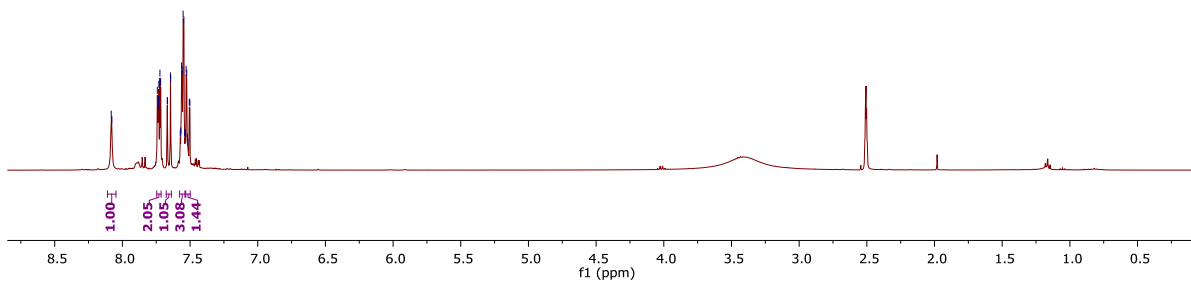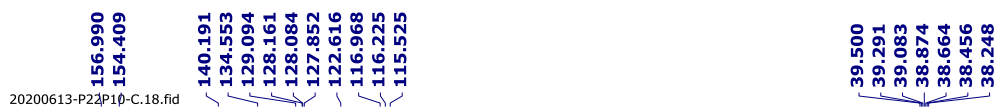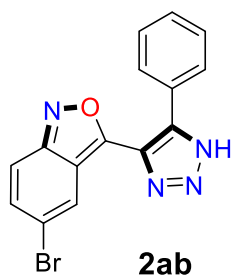

$^{13}\text{C}\{^1\text{H}\}$  NMR (100 MHz,  $\text{DMSO}-d_6$ )

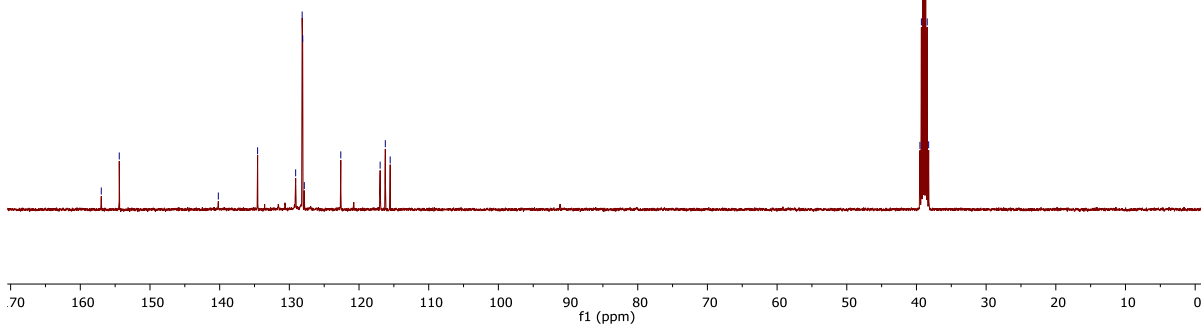

20200613-P22P11-H.19.fid

8.090  
7.660  
7.658  
7.637  
7.635  
7.624  
7.619  
7.608  
7.603  
7.522  
7.518  
7.499  
7.494  
7.369  
7.349  
7.328

2.397

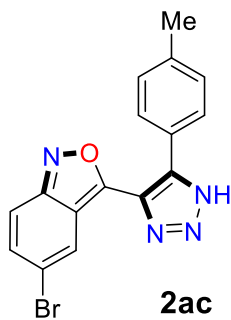

$^1\text{H}$  NMR (400 MHz,  $\text{DMSO}-d_6$ )

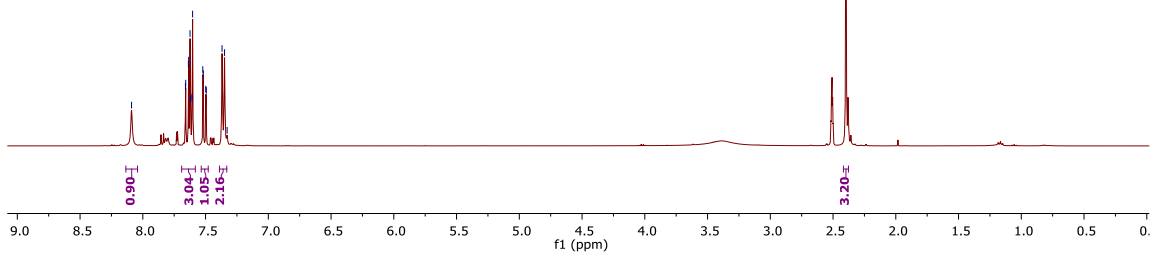

20200613-P22P11-C.20.fid

157.099  
154.371

140.149  
138.841  
134.491  
128.701  
128.415  
128.035  
127.927  
122.678  
116.846  
116.162  
115.456

39.500  
39.292  
39.084  
38.875  
38.665  
38.457  
38.248

20.326

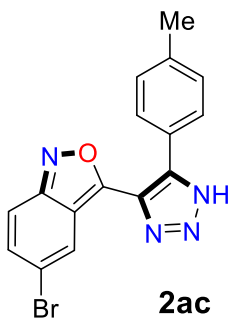

$^{13}\text{C}\{^1\text{H}\}$  NMR (100 MHz,  $\text{DMSO}-d_6$ )

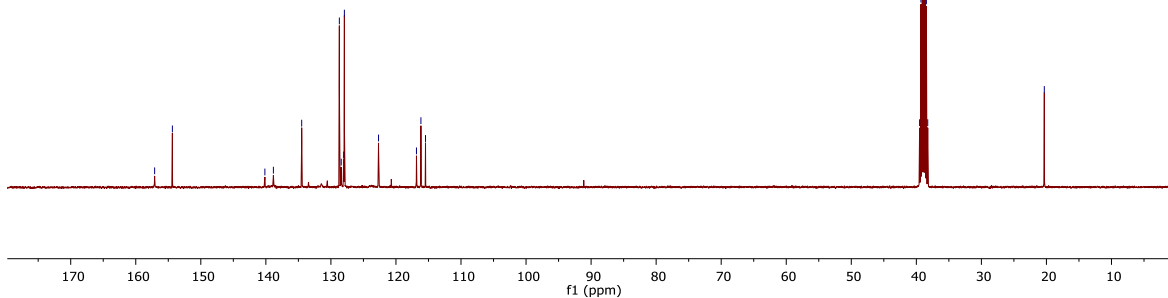

20200718-P22P20-H.14.fid

7.881  
7.738  
7.727  
7.716  
7.702  
7.557  
7.545  
7.540  
7.421  
7.397

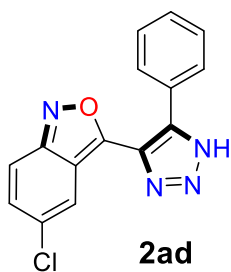

$^1\text{H}$  NMR (400 MHz, DMSO- $d_6$ )

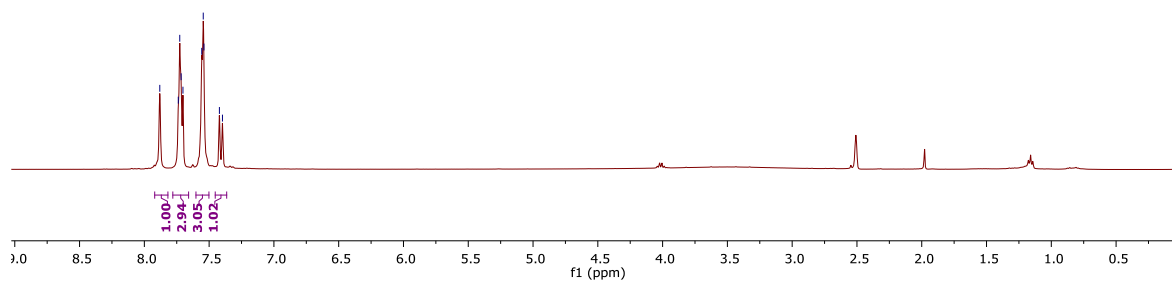

20200718-P22P20-C.31.fid

157.194  
154.448

132.410  
129.052  
128.608  
128.138  
128.065  
119.104  
116.218  
114.719

39.499  
39.291  
39.082  
38.874  
38.664  
38.456  
38.247

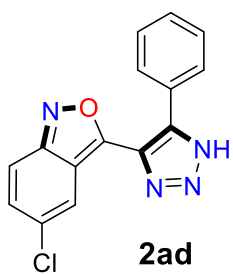

$^{13}\text{C}\{^1\text{H}\}$  NMR (100 MHz, DMSO- $d_6$ )

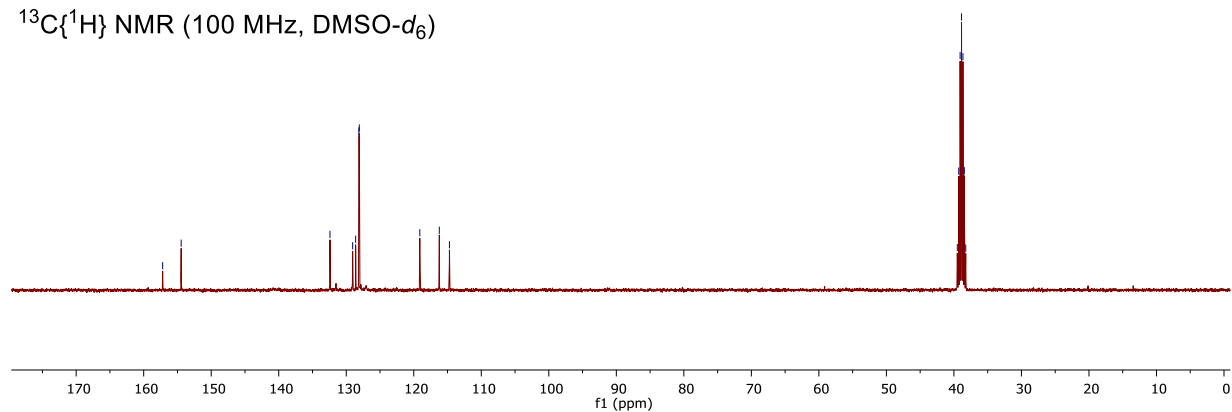

20200718-P22P18-H.12.fid

7.721  
7.713  
7.701  
7.610  
7.580  
7.557  
7.546  
7.532  
7.301  
7.278

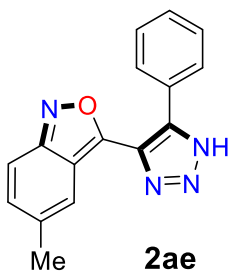

$^1\text{H}$  NMR (400 MHz,  $\text{DMSO}-d_6$ )

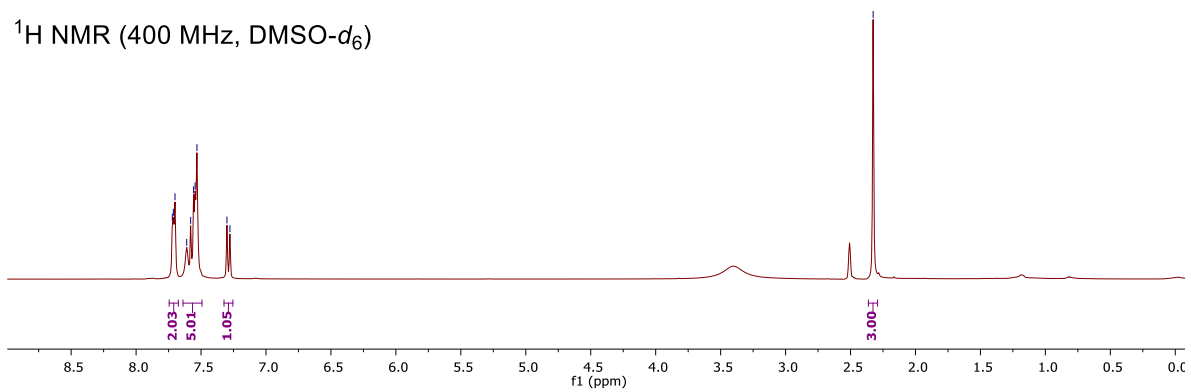

20200718-P22P18-C.29.fid

155.618  
155.390  
134.468  
133.777  
128.851  
128.106  
127.996  
117.707  
115.094  
113.618

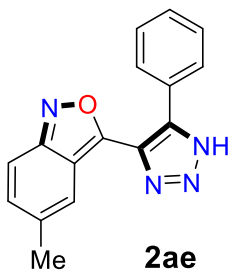

$^{13}\text{C}\{^1\text{H}\}$  NMR (100 MHz,  $\text{DMSO}-d_6$ )

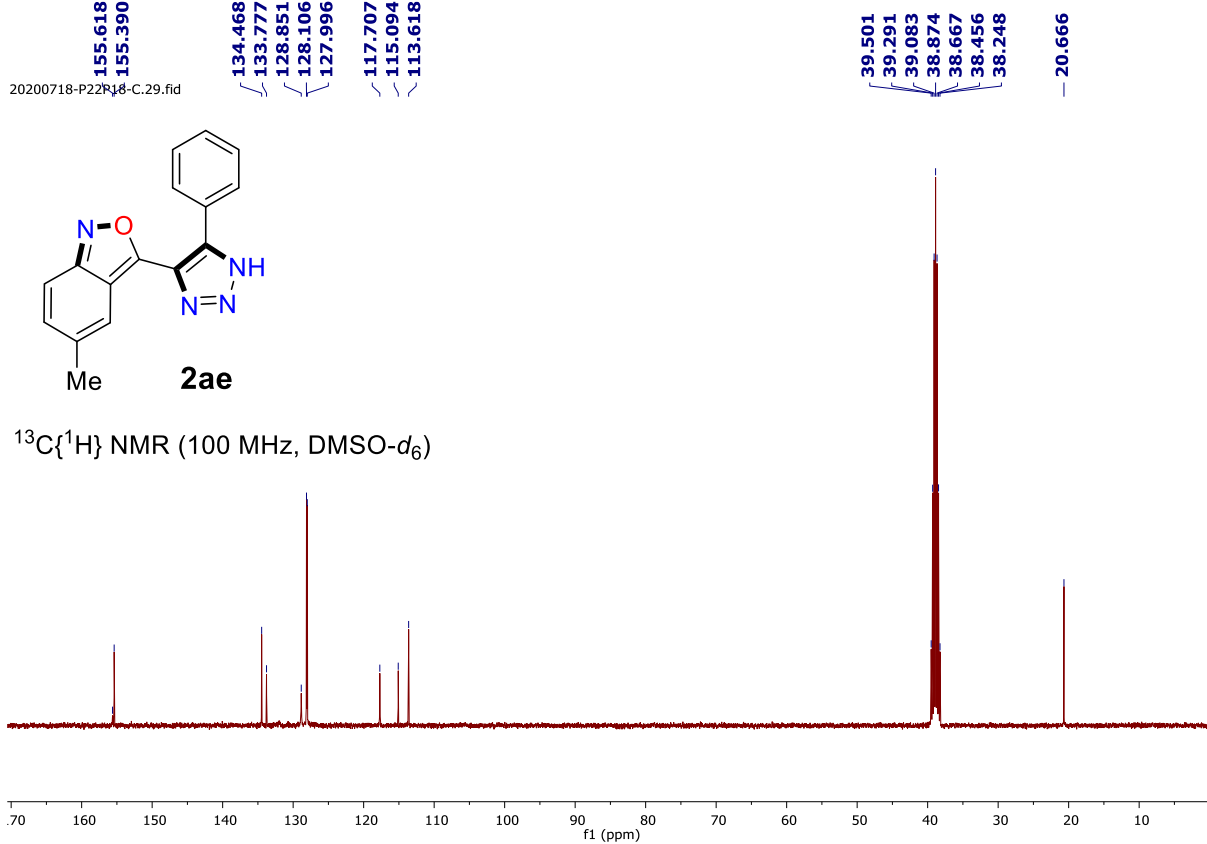

20200718-P22P19-H.13.fid

7.783  
7.760  
7.728  
7.720  
7.708  
7.704  
7.563  
7.551  
7.539  
7.534  
6.992  
6.970

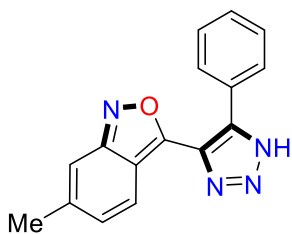

**2af**

$^1\text{H}$  NMR (400 MHz,  $\text{DMSO-}d_6$ )

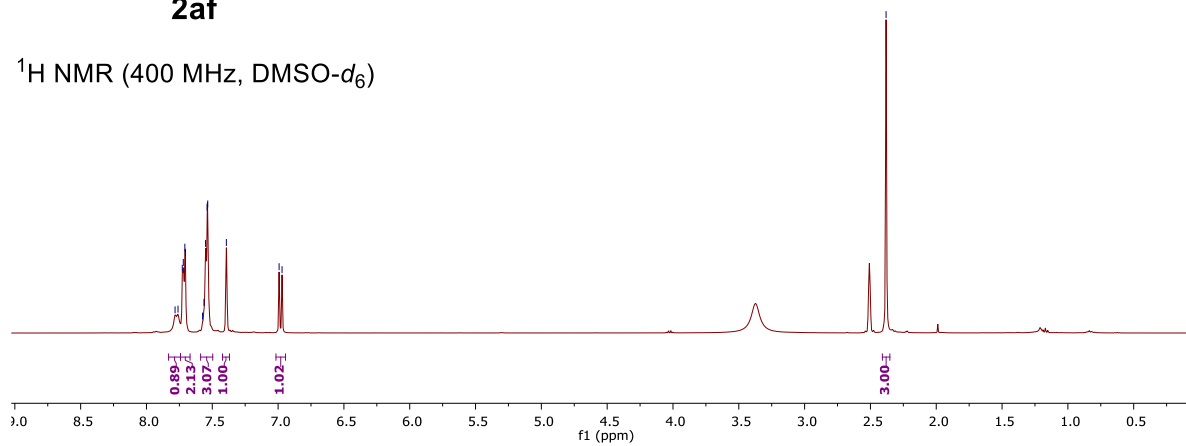

20200718-P22P19-C.30.fid

156.568  
141.351  
128.906  
128.121  
127.990  
127.637  
120.137  
113.579  
111.146

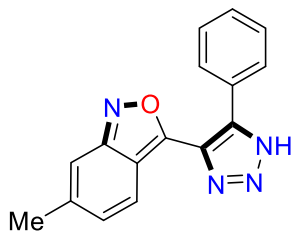

**2af**

$^{13}\text{C}\{^1\text{H}\}$  NMR (100 MHz,  $\text{DMSO-}d_6$ )

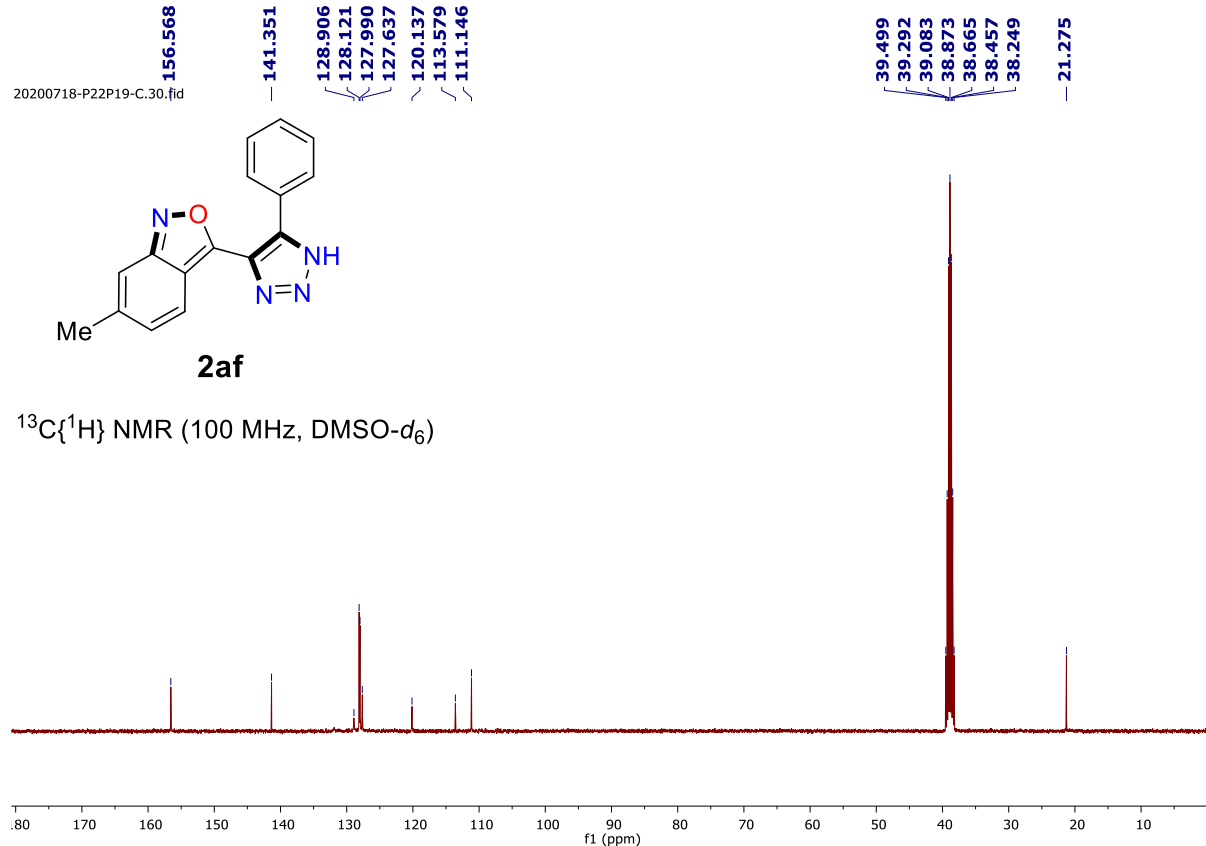



20200818-RT-P22P1-H.4.fid

7.944  
7.942  
7.923  
7.908  
7.902  
7.888  
7.884  
7.859  
7.844  
7.839  
7.831  
7.827  
7.821  
7.816  
7.813  
7.806  
7.799  
7.787  
7.783  
7.782  
7.774  
7.767  
7.762  
7.759  
7.754  
7.747  
7.739

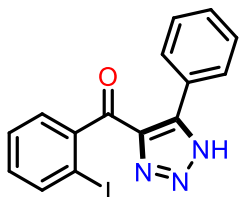

**3a**

$^1\text{H}$  NMR (400 MHz,  $\text{DMSO-}d_6$ )

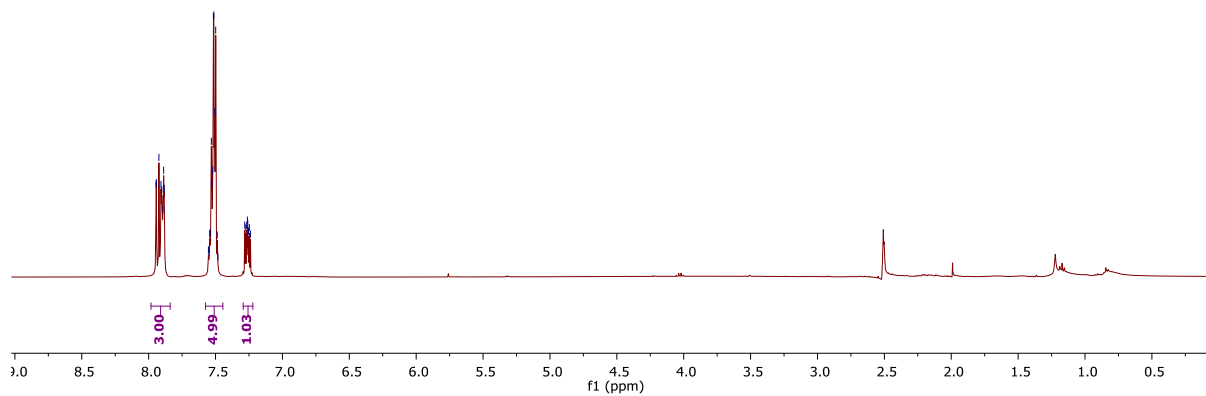

20200822-RT-P22P1-C.2.fid

189.859  
144.041  
138.397  
130.985  
129.099  
128.362  
128.109  
127.836  
127.205  
92.428  
39.502  
39.292  
39.083  
38.875  
38.667  
38.459  
38.248

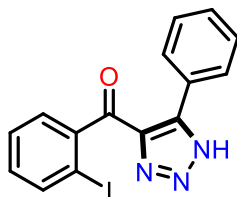

**3a**

$^{13}\text{C}\{^1\text{H}\}$  NMR (100 MHz,  $\text{DMSO-}d_6$ )

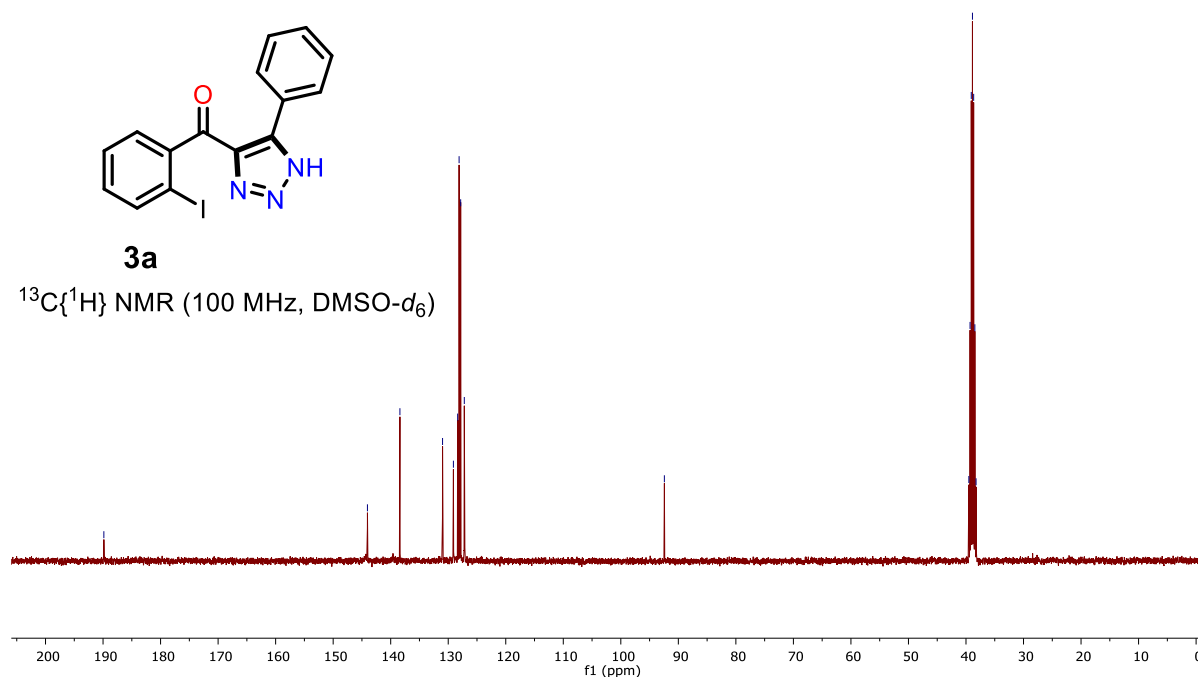

7.617  
7.597  
7.402  
7.384  
7.327  
7.322  
7.307  
7.290  
7.286  
7.282  
7.266  
7.263  
7.259  
7.255  
7.244  
7.240  
7.236  
7.155  
7.151  
7.147  
7.135  
7.117  
7.099  
7.086  
7.082  
7.076  
7.026  
7.007  
6.988  
6.924  
6.920  
6.916  
6.905  
6.901  
6.897  
6.882  
6.878  
6.874  
6.860  
6.855  
6.844  
6.840  
5.952

20200729-No.Cu-1-H.8.fid

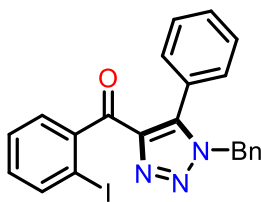

**3b**

$^1\text{H}$  NMR (400 MHz, DMSO- $d_6$ )

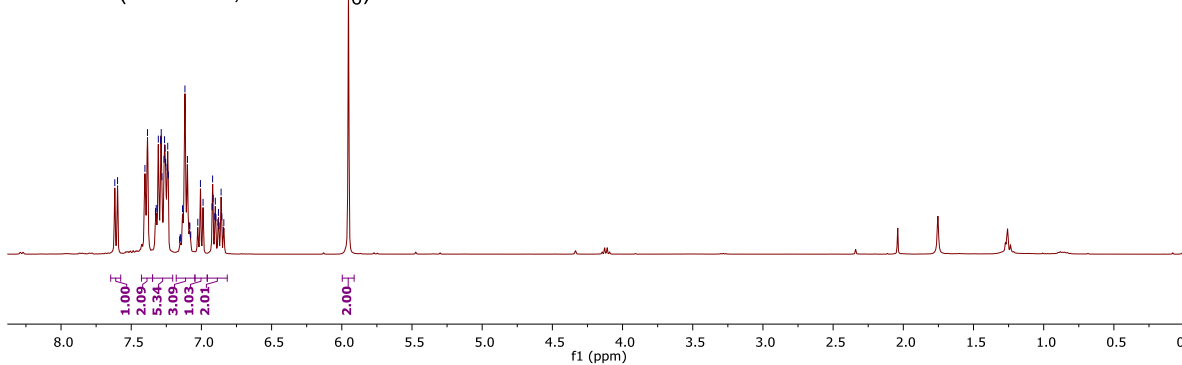

187.078  
151.158  
141.028  
140.188  
134.520  
132.415  
130.248  
129.417  
129.132  
128.895  
128.624  
128.469  
128.403  
128.350  
127.637  
127.378  
93.240  
77.201  
76.883  
76.565  
53.790

20200729-No.Cu-1-C.11.fid

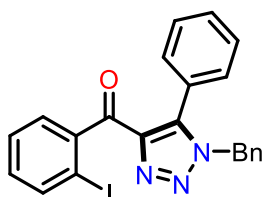

**3b**

$^{13}\text{C}\{^1\text{H}\}$  NMR (100 MHz, DMSO- $d_6$ )

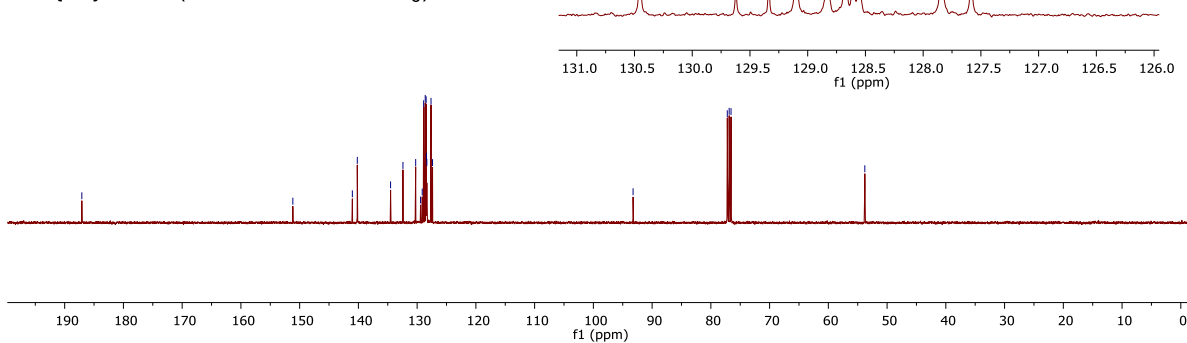

7.638  
7.634  
7.621  
7.617  
7.614  
7.453  
7.435  
7.416  
7.407  
7.390  
7.316  
7.312  
7.298  
7.294  
7.290  
7.277  
7.273  
6.860  
6.839  
6.480  
6.461  
6.442

20200818-ringopen-H.7.fid

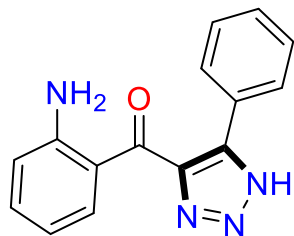

4

$^1\text{H}$  NMR (400 MHz,  $\text{DMSO-}d_6$ )

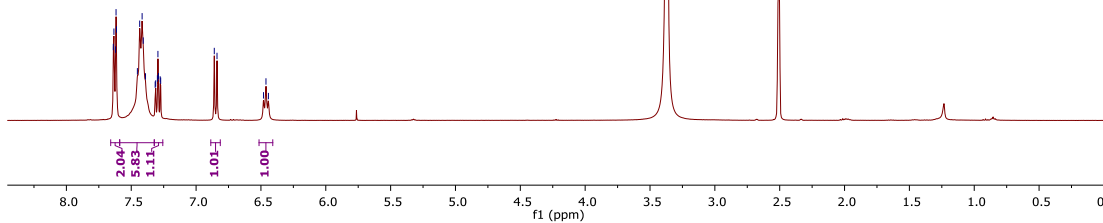

190.526

20200822-ringopen-C2.6.fid

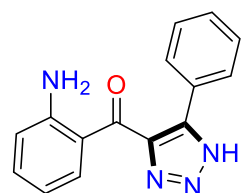

4

$^{13}\text{C}\{^1\text{H}\}$  NMR (100 MHz,  $\text{DMSO-}d_6$ )

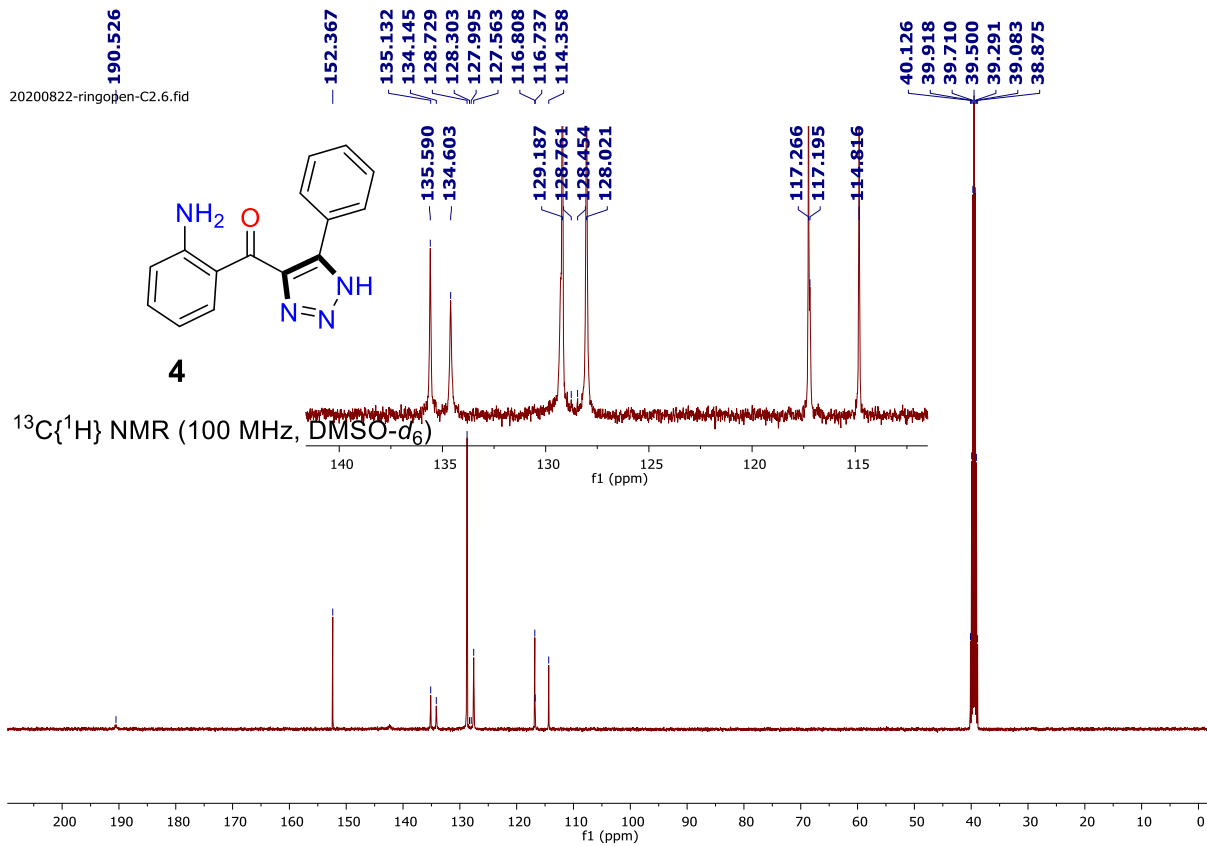

Supplement: d0ob02608e1.pdf [file d0ob02608e1.pdf]
